# Supplementary material for: Role of 5-HT2 Receptors Family in the Allergy-Induced Increased Aorta Contractile Responses to 5-HT
Source: Research Square preprint supplement (doi:10.21203/rs.3.rs-287268/v1), 2021-03-15
Supplement: Supplementary file 1 [file 46229b319ebc4beb9bf83e18.xlsx]

## Sheet: 5-HT Controles
Registros de contracción de aorta cobayos control frente a 5-HT
	VALORES ABSOLUTOS														VALORES EN FUNCIÓN DE LA BASAL														VALORES EN FUNCIÓN DE K+ 80 mM
	Respuesta 5-HT 10-4 expresada en gramos de tensión														Respuesta 5-HT 10-4 expresada en gramos de tensión														Respuesta 5-HT 10-4 expresada en gramos de tensión
	Respuestas	Cobayo 1 210116	Cobayo 2 210116	Cobayo 3 220116	cobayo 4 220116	Cobayo 5R	Cobayo 6R	Cobayo 7R	Cobayo 8R						Respuestas	Cobayo 1	Cobayo 2	Cobayo 3	cobayo 4	Cobayo 5R	Cobayo 6R	Cobayo 7R	Cobayo 8R						Respuestas	Cobayo 1	Cobayo 2	Cobayo 3	cobayo 4	Cobayo 5R	Cobayo 6R	Cobayo 7R	Cobayo 8R
	Basal KCl 80 mM	1.5	1.46	1.52	1.41	1.45	1.52	1.44	1.42						Basal KCl 80 mM	1.5	1.46	1.52	1.41	1.45	1.52	1.44	1.42						Basal KCl 80 mM	1.5	1.46	1.52	1.41	1.45	1.52	1.44	1.42
	Máx KCl 80 mM	4.96	3.43	4.17	4.3	5.93	4.92	5.61	7.46						Máx KCl 80 mM	4.96	3.43	4.17	4.3	5.93	4.92	5.61	7.46						Máx KCl 80 mM	4.96	3.43	4.17	4.3	5.93	4.92	5.61	7.46				Respuesta 5-HT 10-4 expresada en gramos de tensión
	Diferencia	3.46	1.97	2.65	2.89	4.48	3.4	4.17	6.04						Diferencia	3.46	1.97	2.65	2.89	4.48	3.4	4.17	6.04						Diferencia	3.46	1.97	2.65	2.89	4.48	3.4	4.17	6.04
	Basal 5-HT	1.50108	1.52519	1.61739	1.53032	1.49482	1.58035	1.69361	1.34386						Basal 5-HT	1.50108	1.52519	1.61739	1.53032	1.49482	1.58035	1.69361	1.34386						Basal 5-HT	1.50108	1.52519	1.61739	1.53032	1.49482	1.58035	1.69361	1.34386
	Máx 5-HT	3.53	2.76	2.96	2.67	3.59	3	3.58	6.54						Máx 5-HT	3.53	2.76	2.96	2.67	3.59	3	3.58	6.54						Máx 5-HT	3.53	2.76	2.96	2.67	3.59	3	3.58	6.54
	Diferencia	2.02892	1.23481	1.34261	1.13968	2.09518	1.41965	1.88639	5.19614						Diferencia	2.02892	1.23481	1.34261	1.13968	2.09518	1.41965	1.88639	5.19614						Diferencia	2.02892	1.23481	1.34261	1.13968	2.09518	1.41965	1.88639	5.19614
T (min)	0	1.50108	1.52519	1.61739	1.53032	1.49482	1.58035	1.69361	1.34386					T (min)	0	0	0	0	0	0	0	0	0					T (min)	0	0	0	0	0	0	0	0	0
	2	2.57403	2.057	2.05591	1.81151	2.57188	2.30946	3.16073	5.69497						2	1.07295	0.531808	0.438522	0.281192	1.07706	0.729115	1.46712	4.35111						2	31.0102	26.9953	16.548	9.72982	24.0415	21.4445	35.1828	72.0382				MINUTO	PROMEDIO	n	DE	EE
	4	3.19845	2.46608	2.49443	2.06789	3.42252	2.64771	3.54759	6.50706						4	1.69738	0.94089	0.877045	0.537573	1.92769	1.06736	1.85397	5.1632						4	49.0571	47.7609	33.096	18.6011	43.0289	31.393	44.4598	85.4834				0	0	8	0	0
	6	3.42711	2.6788	2.76292	2.33254	3.54529	2.78301	3.52569	5.86593						6	1.92604	1.15361	1.14553	0.802224	2.05047	1.20266	1.83208	4.52207						6	55.6658	58.5591	43.2275	27.7586	45.7693	35.3724	43.9347	74.8688				2	23.5646	8	9.71193	3.43368
	8	3.52385	2.74426	2.89716	2.49795	3.53652	2.82811	3.33591	4.77174						8	2.02278	1.21907	1.27977	0.967631	2.0417	1.24776	1.6423	3.42788						8	58.4618	61.8816	48.2932	33.482	45.5736	36.6989	39.3837	56.7531				4	38.1996	8	14.3162	5.06156
	10	3.49747	2.68698	2.96875	2.5393	3.46636	2.84315	3.23373	3.86562						10	1.99639	1.1618	1.35136	1.00898	1.97154	1.2628	1.54011	2.52176						10	57.6993	58.9744	50.9949	34.9129	44.0076	37.1411	36.9331	41.751				6	44.3268	8	14.0384	4.96331
	12	3.47988	2.68698	2.9419	2.61374	3.38744	2.85066	3.16803	3.4724						12	1.97881	1.1618	1.32452	1.08342	1.89262	1.27031	1.47442	2.12854						12	57.1909	58.9744	49.9818	37.4884	42.2459	37.3621	35.3578	35.2407				8	46.2535	8	12.7464	4.50652
	14	3.4447	2.66244	2.96875	2.65509	3.37867	2.8657	3.17533	3.26724						14	1.94363	1.13725	1.35136	1.12477	1.88385	1.28535	1.48172	1.92338						14	56.1742	57.7284	50.9949	38.9193	42.0502	37.8043	35.5328	31.844				10	45.809	8	11.0569	3.90919
	16	3.43591	2.71971	2.93296	2.64682	3.33482	2.90328	3.21183	3.22449						16	1.93483	1.19452	1.31557	1.1165	1.84	1.32293	1.51821	1.88064						16	55.92	60.6356	49.644	38.6331	41.0714	38.9097	36.408	31.1363				12	45.5145	8	9.75507	3.44894
	18	3.4535	2.68698	2.93296	2.65509	3.3699	2.94838	3.19723	3.25014						18	1.95242	1.1618	1.31557	1.12477	1.87508	1.36803	1.50362	1.90628						18	56.4284	58.9744	49.644	38.9193	41.8544	40.2362	36.058	31.5609				14	45.6006	8	8.52407	3.01372
	20	3.48868	2.70335	2.90611	2.63028	3.35236	2.97093	3.24832	3.29288						20	1.9876	1.17816	1.28872	1.09996	1.85754	1.39058	1.55471	1.94902						20	57.4451	59.805	48.6309	38.0608	41.4629	40.8994	37.2832	32.2686				16	45.8888	8	9.5159	3.36438
	22	3.49747	2.74426	2.83451	2.66336	3.41375	2.97845	3.27752	3.4382						22	1.99639	1.21907	1.21712	1.13304	1.91892	1.3981	1.58391	2.09434						22	57.6993	61.8816	45.9292	39.2054	42.8331	41.1205	37.9834	34.6746				18	46.0164	8	8.95991	3.16781
	24	3.54144	2.7688	2.87926	2.67028	3.38744	3.03858	3.23373	3.51514						24	2.04037	1.24361	1.26187	1.13996	1.89262	1.45823	1.54011	2.17128						24	58.9702	63.1275	47.6178	39.4448	42.2459	42.8891	36.9331	35.9483				20	46.2268	8	9.8675	3.48869
	26	3.53265	2.7688	2.85241	2.69311	3.40498	2.98596	3.21913	3.62627						26	2.03157	1.24361	1.23502	1.16278	1.91016	1.40561	1.52551	2.28241						26	58.716	63.1275	46.6046	40.2348	42.6374	41.3415	36.5831	37.7882				22	46.6646	8	10.456	3.69676
																																									24	47.3183	8	10.7843	3.81283
	Respuesta 5-HT 10-5 expresada en gramos de tensión														Respuesta 5-HT 10-5 expresada en gramos de tensión														Respuesta 5-HT 10-5 expresada en gramos de tensión												26	47.035	8	10.5884	3.74355
	Respuestas	Cobayo 1	Cobayo 2	Cobayo 3	cobayo 4	Cobayo 5	Cobayo 6	Cobayo 7	Cobayo 8						Respuestas	Cobayo 1	Cobayo 2	Cobayo 3	cobayo 4	Cobayo 5	Cobayo 6	Cobayo 7	Cobayo 8						Respuestas	Cobayo 1	Cobayo 2	Cobayo 3	cobayo 4	Cobayo 5	Cobayo 6	Cobayo 7	Cobayo 8
	Basal KCl 80 mM	1.51	1.29	1.49	1.5	1.48	1.52	1.43	1.48						Basal KCl 80 mM	1.51	1.29	1.49	1.5	1.48	1.52	1.43	1.48						Basal KCl 80 mM					1.48	1.52	1.43	1.48
	Máx KCl 80 mM	4.4	5.66	5.3	5.21	6.33	5.96	5.61	4						Máx KCl 80 mM	4.4	5.66	5.3	5.21	6.33	5.96	5.61	4						Máx KCl 80 mM					6.33	5.96	5.61	4				Respuesta 5-HT 10-5 expresada en gramos de tensión
	Diferencia	2.89	4.37	3.81	3.71	4.85	4.44	4.18	2.52						Diferencia	2.89	4.37	3.81	3.71	4.85	4.44	4.18	2.52						Diferencia					4.85	4.44	4.18	2.52
	Basal 5-HT	1.40591	1.39714	1.66943	1.60076	1.66406	1.63741	1.44454	1.52938						Basal 5-HT	1.40591	1.39714	1.66943	1.60076	1.66406	1.63741	1.44454	1.52938						Basal 5-HT					1.66406	1.63741	1.44454	1.52938
	Máx 5-HT	2.47	2.14	2.21	1.81	1.83	1.84	2.44	1.8						Máx 5-HT	2.47	2.14	2.21	1.81	1.83	1.84	2.44	1.8						Máx 5-HT					1.83	1.84	2.44	1.8
	Diferencia	1.06409	0.742865	0.54057	0.209235	0.165944	0.202595	0.995459	0.270617						Diferencia	1.06409	0.742865	0.54057	0.209235	0.165944	0.202595	0.995459	0.270617						Diferencia					0.165944	0.202595	0.995459	0.270617
T (min)	0	1.40591	1.39714	1.66943	1.60076	1.66406	1.63741	1.44454	1.52938					T (min)	0	0	0	0	0	0	0	0	0					T (min)	0	0	0	0	0	0	0	0	0
	2	1.51459	1.39714	1.70092	1.6091	1.73605	1.69674	2.1626	1.78166						2	0.108681	0	0.0314939	0.00833814	0.0719943	0.0593397	0.718061	0.252279						2	3.76058	0	0.826611	0.224748	1.48442	1.33648	17.1785	10.0111				MINUTO	PROMEDIO	n	DE	EE
	4	1.60878	1.45748	1.8269	1.61744	1.77605	1.73065	2.24809	1.76539						4	0.202871	0.0603455	0.157469	0.0166763	0.111991	0.0932482	0.803544	0.236003						4	7.01975	1.3809	4.13306	0.449495	2.3091	2.10018	19.2235	9.36518				0	0	4	0	0
	6	1.7392	1.49196	1.89776	1.68415	1.83204	1.74761	2.17115	1.74911						6	0.333288	0.0948286	0.228331	0.0833814	0.167987	0.110202	0.726609	0.219727						6	11.5325	2.16999	5.99293	2.24748	3.46364	2.48204	17.383	8.71931				2	4.3528	4	1.74041	0.870205
	8	1.8986	1.57817	1.92138	1.73417	1.80804	1.77304	2.05147	1.74097						8	0.492686	0.181036	0.251951	0.13341	0.143989	0.135634	0.606932	0.211589						8	17.048	4.14271	6.61289	3.59596	2.96884	3.05481	14.5199	8.39637				4	5.74765	4	2.96238	1.48119
	10	2.05075	1.65576	2.03948	1.75085	1.80005	1.79847	2.02583	1.74911						10	0.64484	0.258624	0.370053	0.150086	0.135989	0.161065	0.581287	0.219727						10	22.3128	5.91816	9.71268	4.04546	2.8039	3.62759	13.9064	8.71931				6	6.74885	4	4.40835	2.20417
	12	2.2029	1.75059	2.07885	1.73417	1.80005	1.78152	1.96599	1.73283						12	0.796993	0.353452	0.409421	0.13341	0.135989	0.144111	0.521449	0.203451						12	27.5776	8.08815	10.7459	3.59596	2.8039	3.24574	12.4749	8.07343				8	7.54243	4	6.27094	3.13547
	14	2.29709	1.78507	2.11822	1.74251	1.79205	1.78152	1.94889	1.73283						14	0.891183	0.387935	0.448788	0.141748	0.12799	0.144111	0.504352	0.203451						14	30.8368	8.87724	11.7792	3.82071	2.63897	3.24574	12.0658	8.07343				10	8.88078	4	8.22225	4.11113
	16	2.33332	1.88852	2.14971	1.7842	1.75205	1.78999	1.94034	1.75725						16	0.92741	0.491385	0.480282	0.183439	0.087993	0.152588	0.495804	0.227865						16	32.0903	11.2445	12.6058	4.94445	1.81429	3.43666	11.8613	9.04225				12	9.5757	4	10.4747	5.23734
	18	2.39128	1.95749	2.15759	1.77587	1.77605	1.78152	1.95744	1.7247						18	0.985373	0.560351	0.488155	0.175101	0.111991	0.144111	0.5129	0.195312						18	34.0959	12.8227	12.8125	4.7197	2.3091	3.24574	12.2703	7.7505				14	10.1672	4	11.8061	5.90305
	20	2.45649	1.99197	2.18908	1.79254	1.75205	1.83238	1.97454	1.74911						20	1.05058	0.594834	0.519649	0.191777	0.087993	0.194973	0.529997	0.219727						20	36.3523	13.6118	13.6391	5.16919	1.81429	4.39129	12.6794	8.71931				16	10.88	4	11.7308	5.86538
	22	2.45649	2.05232	2.18121	1.81756	1.80804	1.8239	1.96599	1.74911						22	1.05058	0.65518	0.511776	0.216792	0.143989	0.186496	0.521449	0.219727						22	36.3523	14.9927	13.4324	5.84344	2.96884	4.20037	12.4749	8.71931				18	11.2533	4	12.5819	6.29096
	24	2.45476	2.05232	2.2127	1.76753	1.72805	1.78999	1.96599	1.73283						24	1.04885	0.65518	0.54327	0.166763	0.0639949	0.152588	0.521449	0.203451						24	36.2922	14.9927	14.259	4.49495	1.31948	3.43666	12.4749	8.07343				20	12.0471	4	13.3804	6.6902
	26	2.47823	2.14714	2.2127	1.80922	1.68006	1.77304	1.99163	1.75725						26	1.07232	0.750008	0.54327	0.208453	0.0159987	0.135634	0.547094	0.227865						26	37.1044	17.1627	14.259	5.61869	0.329871	3.05481	13.0884	9.04225				22	12.373	4	13.0897	6.54485
																																									24	11.9179	4	13.4048	6.70242
	Respuesta 5-HT 10-6 expresada en gramos de tensión														Respuesta 5-HT 10-6 expresada en gramos de tensión														Respuesta 5-HT 10-6 expresada en gramos de tensión												26	12.4575	4	13.3144	6.65721
	Respuestas	Cobayo 1	Cobayo 2	Cobayo 3	cobayo 4	Cobayo 5	Cobayo 6	Cobayo 7	Cobayo 8						Respuestas					Cobayo 5	Cobayo 6	Cobayo 7	Cobayo 8						Respuestas	Cobayo 1	Cobayo 2	Cobayo 3	cobayo 4	Cobayo 5	Cobayo 6	Cobayo 7	Cobayo 8
	Basal KCl 80 mM	1.48	1.42	1.51	1.5	1.49	1.49	1.45	1.49						Basal KCl 80 mM	1.48	1.42	1.51	1.5	1.49	1.49	1.45	1.49						Basal KCl 80 mM					1.49	1.49	1.45	1.49
	Máx KCl 80 mM	5.7	5.49	3.57	5.7	6.63	5.15	6.1	4.22						Máx KCl 80 mM	5.7	5.49	3.57	5.7	6.63	5.15	6.1	4.22						Máx KCl 80 mM					6.63	5.15	6.1	4.22				Respuesta 5-HT 10-6 expresada en gramos de tensión
	Diferencia	4.22	4.07	2.06	4.2	5.14	3.66	4.65	2.73						Diferencia	4.22	4.07	2.06	4.2	5.14	3.66	4.65	2.73						Diferencia					5.14	3.66	4.65	2.73
	Basal 5-HT	1.43068	1.40886	1.57124	1.46719	1.52301	1.4308	1.4615	1.58382						Basal 5-HT	1.43068	1.40886	1.57124	1.46719	1.52301	1.4308	1.4615	1.58382						Basal 5-HT					1.52301	1.4308	1.4615	1.58382
	Máx 5-HT	1.55	1.48	1.63	1.51	1.65	1.53	1.84	2						Máx 5-HT	1.55	1.48	1.63	1.51	1.65	1.53	1.84	2						Máx 5-HT					1.65	1.53	1.84	2
	Diferencia	0.119324	0.0711401	0.0587631	0.0428053	0.126987	0.0991976	0.378504	0.416178						Diferencia	0.119324	0.0711401	0.0587631	0.0428053	0.126987	0.0991976	0.378504	0.416178						Diferencia					0.126987	0.0991976	0.378504	0.416178
T (min)	0	1.43068	1.40886	1.57124	1.46719	1.52301	1.4308	1.4615	1.58382					T (min)	0	0	0	0	0	0	0	0	0					T (min)	0	0	0	0	0	0	0	0	0
	2	1.43837	1.44455	1.57876	1.47589	1.62302	1.42233	1.7846	1.98225						2	0.00769092	0.0356931	0.0075185	0.00869447	0.100007	-0.00847711	0.3231	0.398424						2	0.182249	0.87698	0.364976	0.207011	1.94567	-0.231615	6.94839	14.5943				MINUTO	PROMEDIO	n	DE	EE
	4	1.49989	1.39994	1.6389	1.46719	1.59994	1.41385	1.83075	2.01615						4	0.0692183	-0.00892327	0.0676665	0	0.0769286	-0.0169542	0.369257	0.432332						4	1.64024	-0.219245	3.28478	0	1.49667	-0.46323	7.94102	15.8364				0	0	4	0	0
	6	1.53066	1.48917	1.60131	1.44981	1.56148	1.4308	1.81537	1.96529						6	0.099982	0.0803094	0.030074	-0.0173889	0.0384643	0	0.353872	0.38147						6	2.36924	1.9732	1.4599	-0.414022	0.748333	0	7.61014	13.9733				2	0.407804	4	0.323086	0.161543
	8	1.52297	1.48025	1.61635	1.46719	1.57686	1.46471	1.80768	1.97377						8	0.0922911	0.0713861	0.045111	0	0.05385	0.0339084	0.346179	0.389947						8	2.18699	1.75396	2.18985	0	1.04767	0.92646	7.4447	14.2838				4	1.17644	4	1.63219	0.816096
	10	1.51528	1.47132	1.63138	1.49328	1.5384	1.44776	1.79998	1.93138						10	0.0846001	0.0624629	0.060148	0.0260834	0.0153857	0.0169542	0.338486	0.347561						10	2.00474	1.53471	2.9198	0.621033	0.299333	0.46323	7.27927	12.7312				6	1.34708	4	1.23167	0.615837
	12	1.55373	1.45348	1.61635	1.49328	1.50763	1.46471	1.76921	1.93986						12	0.123055	0.0446163	0.045111	0.0260834	-0.0153857	0.0339084	0.307714	0.356038						12	2.91599	1.09622	2.18985	0.621033	-0.299333	0.92646	6.61751	13.0417				8	1.5327	4	1.04213	0.521063
	14	1.4922	1.43563	1.65394	1.50197	1.5384	1.49014	1.76921	1.95681						14	0.0615274	0.0267698	0.0827035	0.0347779	0.0153857	0.0593397	0.307714	0.372993						14	1.45799	0.657735	4.01473	0.828044	0.299333	1.6213	6.61751	13.6627				10	1.77007	4	0.957886	0.478943
	16	1.50759	1.47132	1.62387	1.51936	1.52301	1.47319	1.76921	1.93138						16	0.0769092	0.0624629	0.0526295	0.0521668	0	0.0423855	0.307714	0.347561						16	1.82249	1.53471	2.55483	1.24207	0	1.15807	6.61751	12.7312				12	1.70578	4	1.04038	0.52019
	18	1.49989	1.48025	1.61635	1.50197	1.49993	1.49862	1.76921	1.92291						18	0.0692183	0.0713861	0.045111	0.0347779	-0.0230786	0.0678168	0.307714	0.339084						18	1.64024	1.75396	2.18985	0.828044	-0.449	1.85292	6.61751	12.4207				14	1.73963	4	1.5553	0.777651
	20	1.50759	1.4624	1.62387	1.50197	1.52301	1.45623	1.7769	1.93138						20	0.0769092	0.0535396	0.0526295	0.0347779	0	0.0254313	0.315407	0.347561						20	1.82249	1.31547	2.55483	0.828044	0	0.694845	6.78295	12.7312				16	1.78853	4	0.56315	0.281575
	22	1.44606	1.47132	1.60131	1.50197	1.51532	1.41385	1.76152	1.91443						22	0.0153818	0.0624629	0.030074	0.0347779	-0.00769286	-0.0169542	0.300022	0.330607						22	0.364499	1.53471	1.4599	0.828044	-0.149667	-0.46323	6.45208	12.1102				18	1.60303	4	0.568369	0.284184
	24	1.47682	1.45348	1.61635	1.50197	1.46147	1.41385	1.76921	1.93986						24	0.0461455	0.0446163	0.045111	0.0347779	-0.0615429	-0.0169542	0.307714	0.356038						24	1.0935	1.09622	2.18985	0.828044	-1.19733	-0.46323	6.61751	13.0417				20	1.63021	4	0.738111	0.369056
	26	1.43837	1.43563	1.63138	1.49328	1.44608	1.40537	1.75383	1.96529						26	0.00769092	0.0267698	0.060148	0.0260834	-0.0769286	-0.0254313	0.292329	0.38147						26	0.182249	0.657735	2.9198	0.621033	-1.49667	-0.694845	6.28664	13.9733				22	1.04679	4	0.554408	0.277204
																																									24	1.3019	4	0.605182	0.302591
	Respuesta 5-HT 10-7 expresada en gramos de tensión														Respuesta 5-HT 10-7 expresada en gramos de tensión														Respuesta 5-HT 10-7 expresada en gramos de tensión												26	1.09521	4	1.23543	0.617716
	Respuestas	Cobayo 1	Cobayo 2	Cobayo 3	cobayo 4	Cobayo 5	Cobayo 6	Cobayo 7	Cobayo 8						Respuestas	Cobayo 1	Cobayo 2	Cobayo 3	cobayo 4	Cobayo 5	Cobayo 6	Cobayo 7	Cobayo 8						Respuestas	Cobayo 1	Cobayo 2	Cobayo 3	cobayo 4	Cobayo 5	Cobayo 6	Cobayo 7	Cobayo 8
	Basal KCl 80 mM	1.25	1.45	1.46	1.41			1.4	1.46						Basal KCl 80 mM	1.25	1.45	1.46	1.41	0	0	1.4	1.46						Basal KCl 80 mM					0	0	1.4	1.46
	Máx KCl 80 mM	4.45	3.54	4	5			6.1	4						Máx KCl 80 mM	4.45	3.54	4	5	0	0	6.1	4						Máx KCl 80 mM					0	0	6.1	4				Respuesta 5-HT 10-7 expresada en gramos de tensión
	Diferencia	3.2	2.09	2.54	3.59	0	0	4.7	2.54						Diferencia	3.2	2.09	2.54	3.59	0	0	4.7	2.54						Diferencia					0	0	4.7	2.54
	Basal 5-HT	1.48397	1.5076	1.59557	1.30745			1.42527	1.51641						Basal 5-HT	1.48397	1.5076	1.59557	1.30745	0	0	1.42527	1.51641						Basal 5-HT					0	0	1.42527	1.51641
	Máx 5-HT	1.51	1.52	1.64	1.38			1.55	2.1						Máx 5-HT	1.51	1.52	1.64	1.38	0	0	1.55	2.1						Máx 5-HT					0	0	1.55	2.1
	Diferencia	0.0260307	0.0123951	0.0444263	0.0725522	0	0	0.124725	0.583592						Diferencia	0.0260307	0.0123951	0.0444263	0.0725522	0	0	0.124725	0.583592						Diferencia					0	0	0.124725	0.583592
T (min)	0	1.48397	1.5076	1.59557	1.30745			1.42527	1.51641					T (min)	0	0	0	0	0	0	0	0	0					T (min)	0	0	0	0	0			0	0
	2	1.46784	1.51906	1.58031	1.34678			1.38591	1.5492						2	-0.0161298	0.0114512	-0.0152664	0.0393297	0	0	-0.0393674	0.032797						2	-0.504056	0.547907	-0.60104	1.09553			-0.837603	1.29122				MINUTO	PROMEDIO	n	DE	EE
	4	1.51623	1.5076	1.58794	1.33871			1.34654	1.90177						4	0.0322596	0	-0.00763321	0.0312627	0	0	-0.0787347	0.385364						4	1.00811	0	-0.30052	0.870826			-1.67521	15.1718				0	0	4	0	0
	6	1.51623	1.51142	1.59557	1.36291			1.48039	1.97557						6	0.0322596	0.00381708	0	0.0554638	0	0	0.0551143	0.459158						6	1.00811	0.182636	0	1.54495			1.17264	18.0771				2	0.134586	4	0.825281	0.41264
	8	1.54849	1.51142	1.61084	1.37905			1.47252	2.09035						8	0.0645192	0.00381708	0.0152664	0.0715978	0	0	0.0472408	0.573947						8	2.01622	0.182636	0.60104	1.99437			1.00512	22.5963				4	0.394605	4	0.643452	0.321726
	10	1.51623	1.52287	1.64137	1.33871			1.45677	2.11495						10	0.0322596	0.0152683	0.0457993	0.0312627	0	0	0.0314939	0.598545						10	1.00811	0.730542	1.80312	0.870826			0.670083	23.5648				6	0.683925	4	0.722382	0.361191
	12	1.56462	1.52287	1.61847	1.37098			1.46464	2.18055						12	0.080649	0.0152683	0.0228996	0.0635308	0	0	0.0393674	0.664139						12	2.52028	0.730542	0.90156	1.76966			0.837603	26.1472				8	1.19857	4	0.947104	0.473552
	14	1.48397	1.51906	1.63374	1.38711			1.5355	2.08216						14	0	0.0114512	0.0381661	0.0796648	0	0	0.110229	0.565748						14	0	0.547907	1.5026	2.21908			2.34529	22.2735				10	1.10315	4	0.480209	0.240105
	16	1.48397	1.49997	1.62611	1.37905			1.52763	2.08216						16	0	-0.00763417	0.0305328	0.0715978	0	0	0.102355	0.565748						16	0	-0.365271	1.20208	1.99437			2.17777	22.2735				12	1.48051	4	0.829129	0.414565
	18	1.49203	1.49615	1.61847	1.33064			1.52763	2.00016						18	0.0080649	-0.0114512	0.0228996	0.0231956	0	0	0.102355	0.483755						18	0.252028	-0.547907	0.90156	0.646118			2.17777	19.0455				14	1.0674	4	0.987417	0.493708
	20	1.53236	1.4847	1.62611	1.36291			1.50401	2.00016						20	0.0483894	-0.0229025	0.0305328	0.0554638	0	0	0.0787347	0.483755						20	1.51217	-1.09581	1.20208	1.54495			1.67521	19.0455				16	0.707794	4	1.08812	0.544061
	22	1.50816	1.47325	1.61847	1.33871			1.50401	1.95097						22	0.0241947	-0.0343537	0.0228996	0.0312627	0	0	0.0787347	0.43456						22	0.756084	-1.64372	0.90156	0.870826			1.67521	17.1087				18	0.31295	4	0.633048	0.316524
	24	1.5001	1.48811	1.62611	1.35484			1.50401	1.96737						24	0.0161298	-0.0194903	0.0305328	0.0473967	0	0	0.0787347	0.450958						24	0.504056	-0.932548	1.20208	1.32024			1.67521	17.7543				20	0.790847	4	1.26723	0.633613
	26	1.5001	1.48531	1.61084	1.35596			1.52763	1.98376						26	0.0161298	-0.022293	0.0152664	0.0485077	0	0	0.102355	0.467357						26	0.504056	-1.06665	0.60104	1.35119			2.17777	18.3999				22	0.221188	4	1.24485	0.622423
																																									24	0.523458	4	1.03533	0.517665
																																									26	0.347409	4	1.01588	0.507938

## Sheet: 5-HT Sensibilizados
Registros de contracción de aorta cobayos sensibilizados frente a 5-HT
	VALORES ABSOLUTOS														VALORES EN FUNCIÓN DE LA BASAL														VALORES EN FUNCIÓN DE K+ 80 mM
	Respuesta 5-HT 10-4 expresada en gramos de tensión														Respuesta 5-HT 10-4 expresada en gramos de tensión														Respuesta 5-HT 10-4 expresada en gramos de tensión
	Respuestas	Cobayo 1- 041215	Cobayo 2-041215	Cobayo 3 201215	cobayo 4 201215	Cobayo 5 211215	Cobayo 6 211215	Cobayo 7 250216	Cobayo 8 110616	Cobayo 9 110616					Respuestas	Cobayo 1- 041215	Cobayo 2-041215	Cobayo 3 201215	cobayo 4 201215	Cobayo 5 211215	Cobayo 6 211215	Cobayo 7 250216	Cobayo 8 110616	Cobayo 9 110616					Respuestas	Cobayo 1- 041215	Cobayo 2-041215	Cobayo 3 201215	cobayo 4 201215	Cobayo 5 211215	Cobayo 6 211215	Cobayo 7 250216	Cobayo 8 110616	Cobayo 9 110616
	Basal KCl 80 mM	1.41	1.35	1.41	1.44	1.36	1.32	1.46	1.5	1.45					Basal KCl 80 mM	1.41	1.35	1.41	1.44	1.36	1.32	1.46	1.5	1.45					Basal KCl 80 mM	1.41	1.35	1.41	1.44	1.36	1.32	1.46	1.5	1.45
	Máx KCl 80 mM	3.79	4	5	4.63	4.89	4.45	3.48	4.75	4.86					Máx KCl 80 mM	3.79	4	5	4.63	4.89	4.45	3.48	4.75	4.86					Máx KCl 80 mM	3.79	4	5	4.63	4.89	4.45	3.48	4.75	4.86					Respuesta 5-HT 10-4 expresada en gramos de tensión
	Diferencia	2.38	2.65	3.59	3.19	3.53	3.13	2.02	3.25	3.41					Diferencia	2.38	2.65	3.59	3.19	3.53	3.13	2.02	3.25	3.41					Diferencia	2.38	2.65	3.59	3.19	3.53	3.13	2.02	3.25	3.41
	Basal 5-HT	1.45372	1.51629	1.55154	1.30679	1.45508	1.42416	1.57215	1.58177	1.52789					Basal 5-HT	1.45372	1.51629	1.55154	1.30679	1.45508	1.42416	1.57215	1.58177	1.52789					Basal 5-HT	1.45372	1.51629	1.55154	1.30679	1.45508	1.42416	1.57215	1.58177	1.52789
	Máx 5-HT	3.45	3.61	3.47	3.43	1.84	2.39	2.19	2.27	3.49					Máx 5-HT	3.45	3.61	3.47	3.43	1.84	2.39	2.19	2.27	3.49					Máx 5-HT	3.45	3.61	3.47	3.43	1.84	2.39	2.19	2.27	3.49
	Diferencia	1.99628	2.09371	1.91846	2.12321	0.384919	0.965838	0.617847	0.688228	1.96211					Diferencia	1.99628	2.09371	1.91846	2.12321	0.384919	0.965838	0.617847	0.688228	1.96211					Diferencia	1.99628	2.09371	1.91846	2.12321	0.384919	0.965838	0.617847	0.688228	1.96211
T (min)	0	1.45372	1.51629	1.55154	1.30679	1.45508	1.42416	1.57215	1.58177	1.52789				T (min)	0	0	0	0	0	0	0	0	0	0				T (min)	0	0	0	0	0	0	0	0	0	0
	2	1.44813	1.73033	1.71588	1.71549	2.2535	2.26705	1.93155	1.99381	2.07095					2	-0.00559431	0.214048	0.164343	0.408695	0.798422	0.842887	0.359395	0.412041	0.543055					2	-0.235055	8.07728	4.57781	12.8118	22.6182	26.9293	17.7918	12.6782	15.9254						PROMEDIO	n	DE	EE
	4	1.44216	1.91573	1.91305	1.95368	3.08986	2.77459	2.66127	2.7197	2.70682					4	-0.0115616	0.399445	0.361509	0.64689	1.63477	1.35043	1.08912	1.13793	1.17893					4	-0.48578	15.0734	10.0699	20.2787	46.3109	43.1447	53.9167	35.0133	34.5728					0	0	9	0	0
	6	1.43159	2.02558	2.03642	2.10473	3.37294	2.98947	3.17319	3.1492	3.05756					6	-0.0221286	0.50929	0.484883	0.797943	1.91786	1.56531	1.60104	1.56743	1.52966					6	-0.929773	19.2185	13.5065	25.0139	54.3303	50.0099	79.2593	48.2285	44.8582					2	19.1886	9	8.56293	2.85431
	8	1.48878	2.07923	2.10532	2.24475	3.39975	3.07569	3.34905	3.3459	3.18358					8	0.0350577	0.56294	0.553786	0.937959	1.94467	1.65153	1.7769	1.76413	1.65569					8	1.47301	21.243	15.4258	29.4031	55.0897	52.7645	87.9653	54.2809	48.5538					4	42.5917	9	18.3184	6.10612
	10	1.63945	2.10378	2.12721	2.31634	3.34758	3.07641	3.40308	3.4185	3.20989					10	0.185731	0.587498	0.575667	1.00954	1.8925	1.65225	1.83093	1.83673	1.682					10	7.80383	22.1697	16.0353	31.6471	53.6119	52.7876	90.64	56.5148	49.3256					6	55.3372	9	24.7328	8.24428
	12	1.744	2.11241	2.13687	2.34041	3.30987	3.05833	3.3768	3.46273	3.18155					12	0.290282	0.596126	0.585328	1.03362	1.85479	1.63416	1.80465	1.88095	1.65366					12	12.1967	22.4953	16.3044	32.4017	52.5437	52.2097	89.3391	57.8755	48.4945					8	59.7308	9	26.2595	8.75316
	14	1.79833	2.11872	2.14839	2.35723	3.26849	3.09269	3.29586	3.43767	3.17366					14	0.344609	0.602431	0.59685	1.05043	1.81341	1.66853	1.72371	1.8559	1.64577					14	14.4794	22.7333	16.6254	32.929	51.3715	53.3077	85.3321	57.1045	48.2629					10	60.576	9	25.5555	8.51849
	16	1.79932	2.11285	2.15118	2.36238	3.26794	3.16842	3.2412	3.43681	3.23601					16	0.345604	0.596568	0.599644	1.05559	1.81286	1.74426	1.66905	1.85504	1.70812					16	14.5212	22.512	16.7032	33.0904	51.3557	55.7271	82.6262	57.0782	50.0915					12	60.0925	9	24.4127	8.13757
	18	1.79249	2.11186	2.15048	2.37236	3.26749	3.21629	3.17529	3.49164	3.29634					18	0.338766	0.595573	0.598945	1.06557	1.81241	1.79213	1.60314	1.90986	1.76845					18	14.2339	22.4744	16.6837	33.4034	51.3431	57.2565	79.3634	58.7651	51.8606					14	59.0758	9	22.9499	7.64996
	20	1.7895	2.13133	2.15817	2.39124	3.29263	3.29142	3.11401	3.55771	3.34573					20	0.335783	0.615042	0.606627	1.08445	1.83755	1.86725	1.54186	1.97593	1.81784					20	14.1085	23.2091	16.8977	33.9952	52.0553	59.6567	76.3295	60.7979	53.3092					16	59.3757	9	22.555	7.51834
	22	1.78751	2.16396	2.16107	2.40114	3.34146	3.34833	3.13829	3.52205	3.39665					22	0.333794	0.647674	0.609537	1.09435	1.88638	1.92417	1.56614	1.94028	1.86876					22	14.0249	24.4405	16.9787	34.3058	53.4386	61.4751	77.5316	59.7008	54.8023					18	59.7177	9	22.2355	7.41183
	24	1.77297	2.15412	2.16131	2.4029	3.38918	3.42804	3.13503	3.49421	3.4257					24	0.319249	0.637829	0.60977	1.09611	1.9341	2.00388	1.56288	1.91243	1.89781					24	13.4138	24.069	16.9852	34.3608	54.7904	64.0216	77.3703	58.8442	55.6542					20	60.4297	9	22.0253	7.34176
	26	1.76054	2.2196	2.1584	2.40787	3.40086	3.41441	3.18759	3.49239	3.46457					26	0.306817	0.703316	0.60686	1.10108	1.94578	1.99025	1.61544	1.91061	1.93668					26	12.8915	26.5402	16.9042	34.5165	55.1212	63.5863	79.9722	58.7881	56.7941					22	61.3897	9	22.3248	7.44161
																																											24	62.1361	9	22.7518	7.58393
	Respuesta 5-HT 10-5 expresada en gramos de tensión														Respuesta 5-HT 10-5 expresada en gramos de tensión														Respuesta 5-HT 10-5 expresada en gramos de tensión														26	62.8524	9	23.1062	7.70205
	Respuestas	Cobayo 1	Cobayo 2	Cobayo 3	cobayo 4	Cobayo 5	Cobayo 6	Cobayo 7	Cobayo 8	Cobayo 9					Respuestas	Cobayo 1	Cobayo 2	Cobayo 3	cobayo 4	Cobayo 5	Cobayo 6	Cobayo 7	Cobayo 8	Cobayo 9					Respuestas	Cobayo 1	Cobayo 2	Cobayo 3	cobayo 4	Cobayo 5	Cobayo 6	Cobayo 7	Cobayo 8	Cobayo 9
	Basal KCl 80 mM	1.37	1.47	1.42	1.42	1.3	1.35	1.45	1.46	1.5					Basal KCl 80 mM	1.37	1.47	1.42	1.42	1.3	1.35	1.45	1.46	1.5					Basal KCl 80 mM	1.37	1.47	1.42	1.42	1.3	1.35	1.45	1.46	1.5
	Máx KCl 80 mM	4.67	4.32	4.5	4.27	4.75	4.47	5.19	5.57	4.85					Máx KCl 80 mM	4.67	4.32	4.5	4.27	4.75	4.47	5.19	5.57	4.85					Máx KCl 80 mM	4.67	4.32	4.5	4.27	4.75	4.47	5.19	5.57	4.85					Respuesta 5-HT 10-5 expresada en gramos de tensión
	Diferencia	3.3	2.85	3.08	2.85	3.45	3.12	3.74	4.11	3.35					Diferencia	3.3	2.85	3.08	2.85	3.45	3.12	3.74	4.11	3.35					Diferencia	3.3	2.85	3.08	2.85	3.45	3.12	3.74	4.11	3.35
	Basal 5-HT	1.45477	1.32405	1.37768	1.3829	1.27542	1.45105	1.62032	1.54738	1.65831					Basal 5-HT	1.45477	1.32405	1.37768	1.3829	1.27542	1.45105	1.62032	1.54738	1.65831					Basal 5-HT	1.45477	1.32405	1.37768	1.3829	1.27542	1.45105	1.62032	1.54738	1.65831
	Máx 5-HT	3.49	2.46	1.86	1.93	1.44	1.57	1.75	1.85	2.05					Máx 5-HT	3.49	2.46	1.86	1.93	1.44	1.57	1.75	1.85	2.05					Máx 5-HT	3.49	2.46	1.86	1.93	1.44	1.57	1.75	1.85	2.05
	Diferencia	2.03523	1.13595	0.482315	0.547101	0.164578	0.118953	0.129675	0.302624	0.391686					Diferencia	2.03523	1.13595	0.482315	0.547101	0.164578	0.118953	0.129675	0.302624	0.391686					Diferencia	2.03523	1.13595	0.482315	0.547101	0.164578	0.118953	0.129675	0.302624	0.391686
T (min)	0	1.45477	1.32405	1.37768	1.3829	1.27542	1.45105	1.62032	1.54738	1.65831				T (min)	0	0	0	0	0	0	0	0	0	0				T (min)	0	0	0	0	0	0	0	0	0	0
	2	1.46335	1.36709	1.42411	1.54653	1.27561	1.44528	1.81935	1.7097	1.79644					2	0.00857325	0.0430394	0.0464277	0.16363	0.000192082	-0.00576935	0.199028	0.162325	0.138123					2	0.259795	1.51015	1.50739	5.74142	0.00556759	-0.184915	5.3216	3.94952	4.12308						PROMEDIO	n	DE	EE
	4	1.58407	1.49298	1.63318	1.87346	1.2809	1.42739	1.98416	1.71875	1.85965					4	0.129297	0.168927	0.255495	0.490557	0.00547433	-0.0236544	0.363837	0.171372	0.201336					4	3.91808	5.92725	8.2953	17.2125	0.158676	-0.758152	9.72825	4.16963	6.01003					0	0	9	0	0
	6	2.17164	1.66352	1.59896	1.88595	1.27072	1.43143	2.08007	1.71988	1.94986					6	0.716863	0.339469	0.22127	0.503049	-0.00470601	-0.0196158	0.459742	0.172503	0.291543					6	21.7231	11.9112	7.1841	17.6509	-0.136406	-0.628712	12.2926	4.19715	8.70279					2	2.4704	9	2.3348	0.778267
	8	2.71195	1.85772	1.70058	1.81981	1.30414	1.45024	2.1172	1.70991	1.97854					8	1.25718	0.533665	0.322896	0.436906	0.0287162	-0.00080771	0.496871	0.162531	0.320225					8	38.0963	18.7251	10.4837	15.33	0.832355	-0.0258881	13.2853	3.95452	9.55897					4	6.07351	9	5.38892	1.79631
	10	3.01142	2.03922	1.74939	1.77374	1.41929	1.53159	2.13419	1.69706	1.95548					10	1.55664	0.715169	0.371708	0.390839	0.143869	0.0805402	0.513864	0.149681	0.297167					10	47.171	25.0937	12.0684	13.7137	4.17012	2.58142	13.7397	3.64186	8.87067					6	9.21074	9	7.56861	2.52287
	12	3.1779	2.14676	1.78695	1.7444	1.40383	1.50643	2.14036	1.69634	1.99237					12	1.72312	0.82271	0.409269	0.361504	0.128407	0.0553858	0.520033	0.148961	0.33406					12	52.2159	28.867	13.288	12.6843	3.72193	1.77519	13.9046	3.62436	9.97195					8	12.2489	9	11.623	3.87433
	14	3.23362	2.2355	1.81107	1.72031	1.38568	1.49201	2.15328	1.68102	1.99069					14	1.77885	0.911443	0.433389	0.337411	0.110255	0.0409624	0.532952	0.133643	0.332373					14	53.9045	31.9804	14.0711	11.839	3.1958	1.3129	14.2501	3.25166	9.92158					10	14.5612	9	14.0759	4.69196
	16	3.23951	2.2955	1.80593	1.70548	1.37223	1.48059	2.14944	1.67886	2.01195					16	1.78473	0.971444	0.428241	0.322576	0.0968092	0.0295391	0.529111	0.131485	0.353631					16	54.0828	34.0858	13.9039	11.3185	2.80607	0.946766	14.1474	3.19914	10.5562					12	15.5615	9	15.9716	5.32388
	18	3.22984	2.3435	1.77914	1.69298	1.35274	1.48278	2.15467	1.69305	1.98529					18	1.77506	1.01944	0.401452	0.310084	0.0773129	0.0317315	0.534349	0.145671	0.326974					18	53.7897	35.77	13.0341	10.8801	2.24095	1.01703	14.2874	3.54431	9.76042					14	15.9697	9	16.9386	5.64622
	20	3.2101	2.34361	1.76608	1.6661	1.36791	1.48151	2.16038	1.76295	1.96268					20	1.75532	1.01956	0.388391	0.283202	0.0924874	0.0304622	0.540052	0.215577	0.304366					20	53.1916	35.774	12.6101	9.93692	2.68079	0.976352	14.4399	5.24519	9.08555					16	16.1163	9	17.3248	5.77493
	22	3.24718	2.38135	1.7226	1.66878	1.37482	1.46385	2.16061	1.75637	1.9322					22	1.79241	1.05729	0.344919	0.285879	0.0994024	0.012808	0.540285	0.208998	0.273884					22	54.3154	37.098	11.1987	10.0308	2.88123	0.410512	14.4461	5.0851	8.17565					18	16.036	9	17.5525	5.85084
	24	3.32245	2.41135	1.78228	1.65037	1.3827	1.45451	2.15979	1.78362	1.9322					24	1.86767	1.08729	0.404598	0.267475	0.107278	0.00346161	0.53947	0.23624	0.273884					24	56.5961	38.1506	13.1363	9.38509	3.1095	0.110949	14.4243	5.74794	8.17565					20	15.9934	9	17.2898	5.76327
	26	3.33092	2.43269	1.74729	1.64457	1.37089		2.16201	1.79205	1.94581					26	1.87615	1.10864	0.36961	0.261675	0.0954647		0.541681	0.24467	0.287494					26	56.8529	38.8996	12.0003	9.18157	2.76709	0	14.4835	5.95305	8.58192					22	15.9602	9	17.9226	5.97421
																																											24	16.5374	9	18.6262	6.20874
	Respuesta 5-HT 10-6 expresada en gramos de tensión														Respuesta 5-HT 10-6 expresada en gramos de tensión														Respuesta 5-HT 10-6 expresada en gramos de tensión														26	16.5244	9	18.8505	6.28352
	Respuestas	Cobayo 1	Cobayo 2	Cobayo 3	cobayo 4	Cobayo 5	Cobayo 6	Cobayo 7	Cobayo 8	Cobayo 9					Respuestas	Cobayo 1	Cobayo 2	Cobayo 3	cobayo 4	Cobayo 5	Cobayo 6	Cobayo 7	Cobayo 8	Cobayo 9					Respuestas	Cobayo 1	Cobayo 2	Cobayo 3	cobayo 4	Cobayo 5	Cobayo 6	Cobayo 7	Cobayo 8	Cobayo 9
	Basal KCl 80 mM	1.39	1.46	1.48	1.49	1.3	1.35	1.43	1.52	1.5					Basal KCl 80 mM	1.39	1.46	1.48	1.49	1.3	1.35	1.43	1.52	1.5					Basal KCl 80 mM	1.39	1.46	1.48	1.49	1.3	1.35	1.43	1.52	1.5
	Máx KCl 80 mM	4.98	4.14	3.7	4.26	5.21	3	4.87	5.4	5					Máx KCl 80 mM	4.98	4.14	3.7	4.26	5.21	3	4.87	5.4	5					Máx KCl 80 mM	4.98	4.14	3.7	4.26	5.21	3	4.87	5.4	5					Respuesta 5-HT 10-6 expresada en gramos de tensión
	Diferencia	3.59	2.68	2.22	2.77	3.91	1.65	3.44	3.88	3.5					Diferencia	3.59	2.68	2.22	2.77	3.91	1.65	3.44	3.88	3.5					Diferencia	3.59	2.68	2.22	2.77	3.91	1.65	3.44	3.88	3.5
	Basal 5-HT	1.42091	1.44906	1.51532	1.47228	1.40563	1.44201	1.52076	1.57347	1.50086					Basal 5-HT	1.42091	1.44906	1.51532	1.47228	1.40563	1.44201	1.52076	1.57347	1.50086					Basal 5-HT	1.42091	1.44906	1.51532	1.47228	1.40563	1.44201	1.52076	1.57347	1.50086
	Máx 5-HT	1.7	1.54	2	1.65	1.64	1.5	1.67	1.93	1.8					Máx 5-HT	1.7	1.54	2	1.65	1.64	1.5	1.67	1.93	1.8					Máx 5-HT	1.7	1.54	2	1.65	1.64	1.5	1.67	1.93	1.8
	Diferencia	0.27909	0.0909371	0.484678	0.177721	0.234366	0.057986	0.149241	0.356531	0.299136					Diferencia	0.27909	0.0909371	0.484678	0.177721	0.234366	0.057986	0.149241	0.356531	0.299136					Diferencia	0.27909	0.0909371	0.484678	0.177721	0.234366	0.057986	0.149241	0.356531	0.299136
T (min)	0	1.42091	1.44906	1.51532	1.47228	1.40563	1.44201	1.52076	1.57347	1.50086				T (min)	0	0	0	0	0	0	0	0	0	0				T (min)	0	0	0	0	0	0	0	0	0	0
	2	1.42454	1.44427	1.55499	1.47286	1.39501	1.44051	1.56349	1.63677	1.60647					2	0.00362594	-0.00479626	0.0396674	0.000576935	-0.0106235	-0.00150003	0.0427335	0.0633025	0.105605					2	0.101001	-0.178965	1.78682	0.020828	-0.2717	-0.090911	1.24225	1.63151	3.01727						PROMEDIO	n	DE	EE
	4	1.53601	1.45576	1.55635	1.6037	1.38283	1.43544	1.6318	1.63926	1.62087					4	0.115098	0.00669245	0.0410319	0.131426	-0.0228063	-0.00657706	0.111044	0.0657947	0.12001					4	3.20606	0.249718	1.84828	4.74462	-0.583282	-0.39861	3.22802	1.69574	3.42887					0	0	9	0	0
	6	1.54999	1.45431	1.55168	1.62321	1.36324	1.44501	1.61623	1.63717	1.63063					6	0.129084	0.00524242	0.0363537	0.150926	-0.0423964	0.00300006	0.0954661	0.0637012	0.129765					6	3.59564	0.195613	1.63755	5.4486	-1.08431	0.181822	2.77518	1.64178	3.70759					2	0.806456	9	1.16045	0.386815
	8	1.54616	1.46635	1.65976	1.60301	1.38234	1.43867	1.60275	1.64056	1.69858					8	0.12525	0.0172888	0.14444	0.130734	-0.0232936	-0.00334623	0.0819935	0.0670907	0.197711					8	3.48887	0.645106	6.50631	4.71962	-0.595745	-0.202802	2.38353	1.72914	5.64888					4	1.93549	9	1.87435	0.624783
	10	1.53021	1.47862	1.74378	1.59447	1.55124	1.46682	1.57991	1.64475	1.71638					10	0.109296	0.0295583	0.228453	0.122195	0.14561	0.0248082	0.0591532	0.0712776	0.21552					10	3.04446	1.10292	10.2907	4.41137	3.72403	1.50353	1.71957	1.83705	6.1577					6	2.01105	9	2.07029	0.690097
	12	1.53425	1.47282	1.862	1.58836	1.56011	1.48575	1.59128	1.64843	1.7224					12	0.113337	0.0237582	0.346675	0.116079	0.154479	0.0437317	0.0705207	0.0749661	0.221531					12	3.15701	0.8865	15.616	4.19059	3.95086	2.65041	2.05002	1.93212	6.32947					8	2.70255	9	2.56024	0.853412
	14	1.54937	1.47014	1.9003	1.58755	1.56333	1.4704	1.57707	1.64624	1.76981					14	0.128462	0.0210812	0.384978	0.115272	0.157695	0.0283852	0.0563113	0.0727729	0.268946					14	3.57833	0.786613	17.3414	4.16143	4.03312	1.72032	1.63696	1.87559	7.68417					10	3.75459	9	2.94425	0.981416
	16	1.56066	1.48509	1.93675	1.58905	1.55134	1.46348	1.53518	1.69828	1.74633					16	0.139754	0.0360277	0.42143	0.116772	0.145707	0.021462	0.0144199	0.124811	0.245466					16	3.89287	1.34432	18.9833	4.21559	3.72652	1.30073	0.419183	3.21677	7.0133					12	4.52922	9	4.44664	1.48221
	18	1.60117	1.4968	1.95956	1.57105	1.53643	1.45517	1.51508	1.73656	1.74928					18	0.180261	0.0477395	0.444236	0.0987714	0.130795	0.0131541	-0.00568376	0.163091	0.248415					18	5.0212	1.78132	20.0106	3.56575	3.34515	0.79722	-0.165226	4.20338	7.09756					14	4.75754	9	5.15055	1.71685
	20	1.61257	1.48688	1.97194	1.57947	1.48721	1.46071	1.52581	1.7549	1.7469					20	0.191657	0.0378124	0.456614	0.107195	0.0815764	0.0186927	0.00505223	0.181434	0.246033					20	5.33863	1.41091	20.5682	3.86984	2.08635	1.13289	0.146867	4.67613	7.0295					16	4.9014	9	5.63664	1.87888
	22	1.62873	1.48676	1.97291	1.56724	1.43809	1.4539	1.52339	1.76806	1.74395					22	0.207818	0.0377008	0.457588	0.0949636	0.0324551	0.0118849	0.00263137	0.194593	0.243083					22	5.78881	1.40675	20.6121	3.42829	0.830055	0.720295	0.0764933	5.01528	6.94524					18	5.073	9	6.01876	2.00625
	24	1.65867	1.48063	1.95088	1.55351	1.42659	1.43924	1.5396	1.78441	1.74123					24	0.237758	0.0315661	0.435562	0.0812325	0.0209545	-0.00276929	0.0188406	0.210942	0.240361					24	6.62279	1.17784	19.6199	2.93258	0.535921	-0.167836	0.547692	5.43664	6.86746					20	5.13992	9	6.20167	2.06722
	26	1.66996	1.48565	1.95313	1.56309	1.41265		1.52518	1.79398	1.78342					26	0.24905	0.0365854	0.437803	0.0908096	0.00701733		0.0044207	0.220512	0.282558					26	6.93734	1.36513	19.7209	3.27833	0.179471	0	0.128509	5.6833	8.07307					22	4.98037	9	6.35872	2.11957
																																											24	4.84144	9	6.17624	2.05875
	Respuesta 5-HT 10-7 expresada en gramos de tensión														Respuesta 5-HT 10-7 expresada en gramos de tensión														Respuesta 5-HT 10-7 expresada en gramos de tensión														26	5.04067	9	6.3097	2.10323
	Respuestas	Cobayo 1	Cobayo 2	Cobayo 3	cobayo 4	Cobayo 5	Cobayo 6	Cobayo 7	Cobayo 8	Cobayo 9					Respuestas	Cobayo 1	Cobayo 2	Cobayo 3	cobayo 4	Cobayo 5	Cobayo 6	Cobayo 7	Cobayo 8	Cobayo 9					Respuestas	Cobayo 1	Cobayo 2	Cobayo 3	cobayo 4	Cobayo 5	Cobayo 6	Cobayo 7	Cobayo 8	Cobayo 9
	Basal KCl 80 mM	1.48	1.43	1.44	1.45	1.37	1.35	1.4	1.48	1.52					Basal KCl 80 mM	1.48	1.43	1.44	1.45	1.37	1.35	1.4	1.48	1.52					Basal KCl 80 mM	1.48	1.43	1.44	1.45	1.37	1.35	1.4	1.48	1.52
	Máx KCl 80 mM	5.21	2.66	3.9	2.74	5.4	4.11	4.51	5.44	5.26					Máx KCl 80 mM	5.21	2.66	3.9	2.74	5.4	4.11	4.51	5.44	5.26					Máx KCl 80 mM	5.21	2.66	3.9	2.74	5.4	4.11	4.51	5.44	5.26					Respuesta 5-HT 10-7 expresada en gramos de tensión
	Diferencia	3.73	1.23	2.46	1.29	4.03	2.76	3.11	3.96	3.74					Diferencia	3.73	1.23	2.46	1.29	4.03	2.76	3.11	3.96	3.74					Diferencia	3.73	1.23	2.46	1.29	4.03	2.76	3.11	3.96	3.74
	Basal 5-HT	1.50912	1.42933	1.42451	1.47081	1.47485	1.37396	1.59976	1.56326	1.48882					Basal 5-HT	1.50912	1.42933	1.42451	1.47081	1.47485	1.37396	1.59976	1.56326	1.48882					Basal 5-HT	1.50912	1.42933	1.42451	1.47081	1.47485	1.37396	1.59976	1.56326	1.48882
	Máx 5-HT	1.66	1.49	1.73	1.6	1.61	1.47	1.71	1.76	1.65					Máx 5-HT	1.66	1.49	1.73	1.6	1.61	1.47	1.71	1.76	1.65					Máx 5-HT	1.66	1.49	1.73	1.6	1.61	1.47	1.71	1.76	1.65
	Diferencia	0.150885	0.0606653	0.305489	0.129188	0.135149	0.09604	0.110243	0.196738	0.161177					Diferencia	0.150885	0.0606653	0.305489	0.129188	0.135149	0.09604	0.110243	0.196738	0.161177					Diferencia	0.150885	0.0606653	0.305489	0.129188	0.135149	0.09604	0.110243	0.196738	0.161177
T (min)	0	1.50912	1.42933	1.42451	1.47081	1.47485	1.37396	1.59976	1.56326	1.48882				T (min)	0	0	0	0	0	0	0	0	0	0				T (min)	0	0	0	0	0	0	0	0	0	0
	2	1.552	1.43838	1.4384	1.46861	1.44071	1.36934	1.62821	1.63428	1.50729					2	0.0428866	0.00904956	0.0138936	-0.00219983	-0.0341418	-0.00461725	0.0284561	0.0710183	0.018463					2	1.14977	0.735737	0.564782	-0.170529	-0.847192	-0.167292	0.914987	1.79339	0.493664						PROMEDIO	n	DE	EE
	4	1.59218	1.44547	1.46409	1.49756	1.4505	1.35395	1.66085	1.6378	1.50511					4	0.0830614	0.0161318	0.0395758	0.0267515	-0.024356	-0.0200081	0.0610939	0.0745425	0.0162853					4	2.22685	1.31153	1.60877	2.07376	-0.604366	-0.724931	1.96443	1.88239	0.435437					0	0	9	0	0
	6	1.59117	1.46116	1.53029	1.54199	1.43277	1.35441	1.67105	1.68597	1.49933					6	0.082057	0.0318265	0.105781	0.0711801	-0.0420793	-0.0195464	0.0712932	0.122707	0.0105097					6	2.19992	2.58752	4.30004	5.51784	-1.04415	-0.708202	2.29239	3.09866	0.281009					2	0.496369	9	0.793472	0.264491
	8	1.59318	1.46116	1.60365	1.55283	1.42603	1.37211	1.67054	1.69857	1.5373					8	0.0840658	0.0318265	0.179144	0.0820221	-0.0488206	-0.0018469	0.0707833	0.135309	0.0484773					8	2.25377	2.58752	7.28226	6.35831	-1.21143	-0.0669167	2.27599	3.41688	1.29618					4	1.13043	9	1.14834	0.382781
	10	1.60262	1.45736	1.63292	1.56505	1.51987	1.36065	1.67207	1.71907	1.56731					10	0.0935068	0.028023	0.208405	0.094239	0.045015	-0.0133131	0.0723132	0.155813	0.0784915					10	2.50689	2.2783	8.47173	7.30535	1.117	-0.482358	2.32518	3.93467	2.0987					6	2.05834	9	2.20422	0.734739
	12	1.60332	1.45473	1.65723	1.56965	1.55488	1.39043	1.67697	1.69473	1.56059					12	0.0942099	0.0254	0.232718	0.0988351	0.0800267	0.0164682	0.0772088	0.131464	0.0717691					12	2.52573	2.06504	9.4601	7.66164	1.98577	0.596674	2.4826	3.3198	1.91896					8	2.68806	9	2.74341	0.91447
	14	1.60041	1.46024	1.67607	1.57782	1.57836	1.44545	1.68523	1.67454	1.59108					14	0.0912972	0.0309084	0.251559	0.107006	0.103513	0.0714905	0.0854703	0.11128	0.102257					14	2.44765	2.51288	10.226	8.29503	2.56856	2.59023	2.74824	2.8101	2.73414					10	3.28394	9	2.87941	0.959804
	16	1.60805	1.47458	1.68702	1.57672	1.57902	1.44468	1.64708	1.67967	1.60254					16	0.0989304	0.0452478	0.262505	0.105906	0.104165	0.0707209	0.0473248	0.116406	0.113713					16	2.65229	3.67868	10.671	8.20977	2.58474	2.56235	1.5217	2.93954	3.04046					12	3.55737	9	2.96037	0.986788
	18	1.60563	1.46405	1.70744	1.57581	1.56238	1.45161	1.63454	1.72132	1.61835					18	0.0965199	0.0347119	0.282925	0.105002	0.0875292	0.0776468	0.0347797	0.158056	0.129525					18	2.58767	2.8221	11.501	8.13973	2.17194	2.81329	1.11832	3.99131	3.46324					14	4.10364	9	2.96556	0.98852
	20	1.61628	1.45836	1.70565	1.57157	1.56314	1.44922	1.64535	1.73702	1.61276					20	0.107166	0.0290286	0.281136	0.10076	0.0882903	0.0752612	0.0455909	0.173755	0.123939					20	2.87309	2.36004	11.4283	7.81085	2.19083	2.72686	1.46595	4.38774	3.31388					16	4.20672	9	3.08253	1.02751
	22	1.63346	1.44888	1.71259	1.5823	1.54835	1.45538	1.65973	1.73029	1.61456					22	0.124341	0.0195418	0.288082	0.111484	0.0735028	0.0814176	0.059972	0.167026	0.125738					22	3.33354	1.58877	11.7107	8.64218	1.82389	2.94991	1.92836	4.21784	3.36198					18	4.28984	9	3.34236	1.11412
	24	1.64019	1.4254	1.71596	1.57165	1.5377	1.45261	1.66983	1.7037	1.61238					24	0.13107	-0.00393459	0.291451	0.100839	0.0628471	0.0786472	0.0700693	0.140435	0.12356					24	3.51395	-0.319886	11.8476	7.81694	1.55948	2.84954	2.25303	3.54633	3.30375					20	4.28417	9	3.25713	1.08571
	26	1.62793	1.43559	1.70007	1.57008	1.52324		1.66656	1.70167	1.62251					26	0.118817	0.00625163	0.275557	0.0992672	0.0483857		0.0668055	0.138406	0.133691					26	3.18544	0.508263	11.2015	7.69513	1.20064	0	2.14809	3.49509	3.57463					22	4.39524	9	3.47205	1.15735
																																											24	4.04119	9	3.64105	1.21368
																																											26	3.66764	9	3.62421	1.20807

## Sheet: Agonistas C
	VALORES ABSOLUTOS												VALORES EN FUNCIÓN DE LA BASAL														VALORES EN FUNCIÓN DE K+ 80 mM
	Respuesta 5-HT 10-4 expresada en gramos de tensión												Respuesta 5-HT 10-4 menos la respuesta basal														Respuesta 5-HT 10-4 expresada como porcentaje a 100% KCl
	Respuestas	Cobayo 1 200716	Cobayo 2 20716	Cobayo 3 210716	cobayo 4 210716	Cobayo 5	Cobayo 6	Cobayo 7	Cobayo 8				Respuestas	Cobayo 1	Cobayo 2	Cobayo 3	cobayo 4	Cobayo 5	Cobayo 6	Cobayo 7	Cobayo 8						Respuestas	Cobayo 1	Cobayo 2	Cobayo 3	cobayo 4	Cobayo 5	Cobayo 6	Cobayo 7	Cobayo 8
	Basal KCl 80 mM	1.5	1.46	1.52	1.41	1.45	1.52	1.44	1.42				Basal KCl 80 mM	1.5	1.46	1.52	1.41	1.45	1.52	1.44	1.42						Basal KCl 80 mM	1.5	1.46	1.52	1.41	1.45	1.52	1.44	1.42
	Máx KCl 80 mM	4.96	3.43	4.17	4.3	5.93	4.92	5.61	7.46				Máx KCl 80 mM	4.96	3.43	4.17	4.3	5.93	4.92	5.61	7.46						Máx KCl 80 mM	4.96	3.43	4.17	4.3	5.93	4.92	5.61	7.46
	Diferencia	3.46	1.97	2.65	2.89	4.48	3.4	4.17	6.04				Diferencia	3.46	1.97	2.65	2.89	4.48	3.4	4.17	6.04						Diferencia	3.46	1.97	2.65	2.89	4.48	3.4	4.17	6.04				Promedio de las respuestas a 5-HT 10-4 expresada como porcentaje a 100% KCl
	Basal 5-HT	1.50108	1.52519	1.61739	1.53032	1.49482	1.58035	1.69361	1.54751				Basal 5-HT	1.50108	1.52519	1.61739	1.53032	1.49482	1.58035	1.69361	1.54751						Basal 5-HT	1.50108	1.52519	1.61739	1.53032	1.49482	1.58035	1.69361	1.54751
	Máx 5-HT	3.53	2.76	2.96	2.67	3.59	3	3.58	4.16				Máx 5-HT	3.53	2.76	2.96	2.67	3.59	3	3.58	4.16						Máx 5-HT	3.53	2.76	2.96	2.67	3.59	3	3.58	4.16
	Diferencia	2.02892	1.23481	1.34261	1.13968	2.09518	1.41965	1.88639	2.61249				Diferencia	2.02892	1.23481	1.34261	1.13968	2.09518	1.41965	1.88639	2.61249						Diferencia	2.02892	1.23481	1.34261	1.13968	2.09518	1.41965	1.88639	2.61249					PROMEDIO	n	DE	EE
T (min)	0	1.50108	1.52519	1.61739	1.53032	1.49482	1.58035	1.69361	1.54751			T (min)	0	0	0	0	0	0	0	0	0					T (min)	0	0	0	0	0	0	0	0	0				0	0	8	0	0						0
	2	2.57403	2.057	2.05591	1.81151	2.57188	2.30946	3.16073	2.14644				2	1.07295	0.531808	0.438522	0.281192	1.07706	0.729115	1.46712	0.598925						2	31.0102	26.9953	16.548	9.72982	24.0415	21.4445	35.1828	9.91598	0.820797			2	21.8585	8	9.33919	3.3019						2
	4	3.19845	2.46608	2.49443	2.06789	3.42252	2.64771	3.54759	2.66161				4	1.69738	0.94089	0.877045	0.537573	1.92769	1.06736	1.85397	1.1141						4	49.0571	47.7609	33.096	18.6011	43.0289	31.393	44.4598	18.4454	0.400579			4	35.7303	8	12.362	4.37064						4
	6	3.42711	2.6788	2.76292	2.33254	3.54529	2.78301	3.52569	2.88025				6	1.92604	1.15361	1.14553	0.802224	2.05047	1.20266	1.83208	1.33274						6	55.6658	58.5591	43.2275	27.7586	45.7693	35.3724	43.9347	22.0652	0.205351			6	41.5441	8	12.6654	4.4779						6
	8	3.52385	2.74426	2.89716	2.49795	3.53652	2.82811	3.33591	2.97721				8	2.02278	1.21907	1.27977	0.967631	2.0417	1.24776	1.6423	1.4297						8	58.4618	61.8816	48.2932	33.482	45.5736	36.6989	39.3837	23.6705	0.19289			8	43.4307	8	12.7936	4.52324						8
	10	3.49747	2.68698	2.96875	2.5393	3.46636	2.84315	3.23373	2.99147				10	1.99639	1.1618	1.35136	1.00898	1.97154	1.2628	1.54011	1.44396						10	57.6993	58.9744	50.9949	34.9129	44.0076	37.1411	36.9331	23.9067	0.116236			10	43.0712	8	12.1728	4.30372						10
	12	3.47988	2.68698	2.9419	2.61374	3.38744	2.85066	3.16803	2.98103				12	1.97881	1.1618	1.32452	1.08342	1.89262	1.27031	1.47442	1.43352						12	57.1909	58.9744	49.9818	37.4884	42.2459	37.3621	35.3578	23.7337	0.118177			12	42.7919	8	11.9361	4.22003						12
	14	3.4447	2.66244	2.96875	2.65509	3.37867	2.8657	3.17533	3.00084				14	1.94363	1.13725	1.35136	1.12477	1.88385	1.28535	1.48172	1.45333						14	56.1742	57.7284	50.9949	38.9193	42.0502	37.8043	35.5328	24.0617	0.107019			14	42.9082	8	11.4224	4.03844						14
	16	3.43591	2.71971	2.93296	2.64682	3.33482	2.90328	3.21183	2.97153				16	1.93483	1.19452	1.31557	1.1165	1.84	1.32293	1.51821	1.42402						16	55.92	60.6356	49.644	38.6331	41.0714	38.9097	36.408	23.5765	0.101146			16	43.0998	8	11.8457	4.1881						16
	18	3.4535	2.68698	2.93296	2.65509	3.3699	2.94838	3.19723	2.98598				18	1.95242	1.1618	1.31557	1.12477	1.87508	1.36803	1.50362	1.43847						18	56.4284	58.9744	49.644	38.9193	41.8544	40.2362	36.058	23.8157	0.0622442			18	43.2413	8	11.4705	4.05544						18
	20	3.48868	2.70335	2.90611	2.63028	3.35236	2.97093	3.24832	2.96292				20	1.9876	1.17816	1.28872	1.09996	1.85754	1.39058	1.55471	1.4154						20	57.4451	59.805	48.6309	38.0608	41.4629	40.8994	37.2832	23.4339	0.0440906			20	43.3776	8	11.7614	4.1583						20
	22	3.49747	2.74426	2.83451	2.66336	3.41375	2.97845	3.27752	2.97054				22	1.99639	1.21907	1.21712	1.13304	1.91892	1.3981	1.58391	1.42303						22	57.6993	61.8816	45.9292	39.2054	42.8331	41.1205	37.9834	23.5601	0.0369729			22	43.7766	8	11.9366	4.22022						22
	24	3.54144	2.7688	2.87926	2.67028	3.38744	3.03858	3.23373	2.97899				24	2.04037	1.24361	1.26187	1.13996	1.89262	1.45823	1.54011	1.43148						24	58.9702	63.1275	47.6178	39.4448	42.2459	42.8891	36.9331	23.7	0.031273			24	44.3661	8	12.4733	4.40996						24
	26	3.53265	2.7688	2.85241	2.69311	3.40498	2.98596	3.21913	2.9835				26	2.03157	1.24361	1.23502	1.16278	1.91016	1.40561	1.52551	1.43599						26	58.716	63.1275	46.6046	40.2348	42.6374	41.3415	36.5831	23.7746	0.0243297			26	44.1274	8	12.3996	4.38393						26

	Respuesta TCB-2 10-4 expresada en gramos de tensión												Respuesta TCB-2 10-4 menos la respuesta basal														Respuesta TCB-2 10-4 expresada como porcentaje a 100% KCl
	Respuestas	Cobayo 1	Cobayo 2	Cobayo 3	cobayo 4	Cobayo 5	Cobayo 6	Cobayo 7	Cobayo 8				Respuestas	Cobayo 1	Cobayo 2	Cobayo 3	cobayo 4	Cobayo 5	Cobayo 6	Cobayo 7	Cobayo 8						Respuestas	Cobayo 1	Cobayo 2	Cobayo 3	cobayo 4	Cobayo 5	Cobayo 6	Cobayo 7	Cobayo 8														p de la t->
	Basal KCl 80 mM	1.52	1.44	1.48	1.48	1.49	1.51	1.54	1.46				Basal KCl 80 mM	1.52	1.44	1.48	1.48	1.49	1.51	1.54	1.46						Basal KCl 80 mM	1.52	1.44	1.48	1.48	1.49	1.51	1.54	1.46
	Máx KCl 80 mM	4.35	7.58	5.2	5.4	6	5.5	5.5	5.5				Máx KCl 80 mM	4.35	7.58	5.2	5.4	6	5.5	5.5	5.5						Máx KCl 80 mM	4.35	7.58	5.2	5.4	6	5.5	5.5	5.5
	Diferencia	2.83	6.14	3.72	3.92	4.51	3.99	3.96	4.04				Diferencia	2.83	6.14	3.72	3.92	4.51	3.99	3.96	4.04						Diferencia	2.83	6.14	3.72	3.92	4.51	3.99	3.96	4.04				Promedio de las respuestas a TCB-2 10-4 expresada como porcentaje a 100% KCl
	Basal TCB-2	1.55507	1.52902	1.64811	1.52559	1.55703	1.57057	1.57411	1.54131				Basal TCB-2	1.55507	1.52902	1.64811	1.52559	1.55703	1.57057	1.57411	1.54131						Basal TCB-2	1.55507	1.52902	1.64811	1.52559	1.55703	1.57057	1.57411	1.54131
	Máx TCB-2	2.26	2.71754	2.36024	2.1	2.7	2.3	2.35	2.4				Máx TCB-2	2.26	2.71754	2.36024	2.1	2.7	2.3	2.35	2.4						Máx TCB-2	2.26	2.71754	2.36024	2.1	2.7	2.3	2.35	2.4
	Diferencia	0.704927	1.18853	0.71213	0.57441	1.14297	0.729431	0.775887	0.858688				Diferencia	0.704927	1.18853	0.71213	0.57441	1.14297	0.729431	0.775887	0.858688						Diferencia	0.704927	1.18853	0.71213	0.57441	1.14297	0.729431	0.775887	0.858688					PROMEDIO	n	DE	EE
T (min)	0	1.55507	1.52902	1.64811	1.52559	1.55703	1.57057	1.57411	1.54131			T (min)	0	0	0	0	0	0	0	0	0					T (min)	0	0	0	0	0	0	0	0	0				0	0	8	0	0						0
	2	1.59645	1.9566	1.74413	1.68617	1.67156	1.70271	1.73615	1.67887				2	0.0413817	0.427579	0.0960176	0.16058	0.114528	0.132145	0.162039	0.137554						2	1.46225	6.96383	2.58112	4.09644	2.53942	3.3119	4.09189	3.40481				2	3.55646	8	1.63194	0.576979						2
	4	1.61821	2.10154	1.91216	1.89784	1.82658	1.86078	1.8794	1.86221				4	0.0631321	0.572522	0.264048	0.372255	0.269547	0.290207	0.305285	0.320901						4	2.23082	9.32446	7.09807	9.49629	5.97665	7.27335	7.70922	7.94309				4	7.13149	8	2.29177	0.810262						4
	6	1.67007	2.29721	2.1042	2.05113	2.03058	2.00678	2.03654	2.04085				6	0.114999	0.768194	0.456083	0.525536	0.47354	0.436215	0.462428	0.499538						6	4.06356	12.5113	12.2603	13.4065	10.4998	10.9327	11.6775	12.3648				6	10.9646	8	2.93609	1.03806						6
	8	1.7303	2.50013	2.24022	2.10952	2.20668	2.11161	2.15962	2.1581				8	0.175231	0.971113	0.592108	0.583929	0.649645	0.541038	0.585511	0.616787						8	6.1919	15.8162	15.9169	14.8961	14.4046	13.5598	14.7856	15.267				8	13.8548	8	3.18823	1.12721						8
	10	1.81664	2.59434	2.33624	2.10952	2.36502	2.17809	2.24319	2.23727				10	0.261563	1.06533	0.688126	0.583929	0.807986	0.607523	0.669075	0.695957						10	9.24252	17.3506	18.498	14.8961	17.9154	15.2261	16.8958	17.2267				10	15.9064	8	2.96289	1.04754						10
	12	1.86058	2.67406	2.36024	2.11682	2.43738	2.21975	2.28802	2.2771				12	0.30551	1.14504	0.71213	0.591228	0.880344	0.649184	0.713907	0.735786						12	10.7954	18.6489	19.1433	15.0823	19.5198	16.2703	18.0279	18.2125				12	16.9626	8	2.90036	1.02543						12
	14	1.91055	2.75378	2.32024	2.11682	2.49347	2.23859	2.31545	2.30514				14	0.355481	1.22476	0.672123	0.591228	0.93643	0.668018	0.74134	0.763829						14	12.5612	19.9473	18.0678	15.0823	20.7634	16.7423	18.7207	18.9067				14	17.599	8	2.70352	0.955839						14
	16	1.95751	2.71754	2.30423	2.11682	2.52732	2.24272	2.3209	2.32207				16	0.402439	1.18853	0.65612	0.591228	0.970282	0.672151	0.746791	0.780755						16	14.2205	19.3571	17.6376	15.0823	21.514	16.8459	18.8584	19.3256				16	17.8552	8	2.41357	0.853325						16
	18	1.98071	2.64507	2.27223	2.09492	2.54638	2.22325	2.30364	2.32065				18	0.42564	1.11605	0.624114	0.569331	0.989341	0.652683	0.729527	0.779336						18	15.0403	18.1768	16.7773	14.5237	21.9366	16.358	18.4224	19.2905				18	17.5657	8	2.41716	0.854594						18
	20	1.9951	2.60159	2.25622	2.10222	2.56297	2.21055	2.29799	2.33259				20	0.440029	1.07257	0.608111	0.57663	1.00593	0.639985	0.723877	0.791282						20	15.5487	17.4686	16.3471	14.7099	22.3045	16.0397	18.2797	19.5862				20	17.5356	8	2.48102	0.877173						20
	22	2.00157	2.5726	2.24822	2.09492	2.58865	2.19433	2.29326	2.34178				22	0.446498	1.04358	0.60011	0.569331	1.03161	0.623758	0.719149	0.800472						22	15.7773	16.9965	16.132	14.5237	22.8739	15.633	18.1603	19.8137				22	17.4888	8	2.72825	0.964582						22
	24	2.01953	2.49288	2.16821	2.08032	2.62478	2.16226	2.26788	2.35255				24	0.464456	0.963866	0.520095	0.554732	1.06774	0.591688	0.693763	0.811237						24	16.4119	15.6981	13.9811	14.1513	23.675	14.8293	17.5193	20.0801				24	17.0433	8	3.34406	1.1823						24
	26	2.05277	2.45665	2.1202	2.08762	2.67373	2.15118	2.2669	2.38068				26	0.497695	0.92763	0.472086	0.562031	1.1167	0.58061	0.692792	0.839364						26	17.5864	15.108	12.6905	14.3375	24.7605	14.5516	17.4947	20.7763				26	17.1632	8	3.96586	1.40214						26
																																								17.8552
	Respuesta WAY 161503 10-4 expresada en gramos de tensión												Respuesta WAY 161503 10-4 menos la respuesta basal														Respuesta WAY 161503 10-4 expresada como porcentaje a 100% KCl																						como % de 5-HT
	Respuestas	Cobayo 1	Cobayo 2	Cobayo 3	Cobayo 4	Cobayo 5	Cobayo 6	Cobayo 7	Cobayo 8				Respuestas	Cobayo 1	Cobayo 2	Cobayo 3	cobayo 4	Cobayo 5	Cobayo 6	Cobayo 7	Cobayo 8						Respuestas	Cobayo 1	Cobayo 2	Cobayo 3	cobayo 4	Cobayo 5	Cobayo 6	Cobayo 7	Cobayo 8
	Basal KCl 80 mM	1.5	1.5	1.49	1.49	1.5	1.53	1.45	1.45				Basal KCl 80 mM	1.5	1.5	1.49	1.49	1.5	1.53	1.45	1.45						Basal KCl 80 mM	1.5	1.5	1.49	1.49	1.5	1.53	1.45	1.45
	Máx KCl 80 mM	4.59	4.3	4.2	4.2	6	5.3	4.96	5				Máx KCl 80 mM	4.59	4.3	4.2	4.2	6	5.3	4.96	5						Máx KCl 80 mM	4.59	4.3	4.2	4.2	6	5.3	4.96	5
	Diferencia	3.09	2.8	2.71	2.71	4.5	3.77	3.51	3.55				Diferencia	3.09	2.8	2.71	2.71	4.5	3.77	3.51	3.55						Diferencia	3.09	2.8	2.71	2.71	4.5	3.77	3.51	3.55				Promedio de las respuestas a WAY 161503 10-4 expresada como porcentaje a 100% KCl
	Basal WAY 161503	1.52864	1.51216	1.5476	1.49885	1.54706	1.52975	1.53719	1.52181				Basal WAY 161503	1.52864	1.51216	1.5476	1.49885	1.54706	1.52975	1.53719	1.52181						Basal WAY 161503	1.52864	1.51216	1.5476	1.49885	1.54706	1.52975	1.53719	1.52181
	Máx WAY 161503	2.51	2.16	1.8	2	3.12917	2.2	1.9	2				Máx WAY 161503	2.51	2.16	1.8	2	3.12917	2.2	1.9	2						Máx WAY 161503	2.51	2.16	1.8	2	3.12917	2.2	1.9	2
	Diferencia	0.981357	0.647837	0.252395	0.501152	1.58211	0.670246	0.362807	0.478185				Diferencia	0.981357	0.647837	0.252395	0.501152	1.58211	0.670246	0.362807	0.478185						Diferencia	0.981357	0.647837	0.252395	0.501152	1.58211	0.670246	0.362807	0.478185					PROMEDIO	n	DE	EE
T (min)	0	1.52864	1.51216	1.5476	1.49885	1.54706	1.52975	1.53719	1.52181			T (min)	0	0	0	0	0	0	0	0	0					T (min)	0	0	0	0	0	0	0	0	0				0	0	8	0	0						0
	2	1.60337	1.58796	1.5589	1.64619	1.72301	1.85806	1.71108	1.62161				2	0.0747251	0.0757978	0.011296	0.147344	0.175953	0.328306	0.173889	0.0997907						2	2.41829	2.70706	0.416825	5.43704	3.91006	8.70839	4.95411	2.811				2	3.92035	8	2.49365	0.881639						2
	4	1.66705	1.69381	1.64412	1.68482	1.85055	2.00729	1.78064	1.67245				4	0.138402	0.181651	0.0965109	0.185971	0.303494	0.477537	0.243445	0.150634						4	4.47903	6.48752	3.56129	6.86238	6.74432	12.6668	6.93576	4.2432				4	6.49753	8	2.83406	1.00199						4
	6	1.73213	1.80797	1.66784	1.75084	1.95613	2.10429	1.8415	1.73969				6	0.203485	0.295803	0.120237	0.251992	0.40907	0.574536	0.304306	0.217879						6	6.58529	10.5644	4.43678	9.2986	9.09045	15.2397	8.6697	6.13744				6	8.75279	8	3.29386	1.16456						6
	8	1.79802	1.87226	1.67701	1.81144	2.03678	2.20129	1.85889	1.78968				8	0.269372	0.360096	0.129408	0.312597	0.489717	0.671536	0.321695	0.267868						8	8.71754	12.8606	4.77521	11.5349	10.8826	17.8126	9.16511	7.54559				8	10.4118	8	3.90353	1.38011						8
	10	1.83668	1.9323	1.69446	1.82986	2.06307	2.19383	1.88497	1.82333				10	0.30804	0.420138	0.146854	0.331016	0.516007	0.664074	0.347779	0.301512						10	9.96894	15.0049	5.41896	12.2146	11.4668	17.6147	9.90822	8.49329				10	11.2613	8	3.79148	1.34049						10
	12	1.86189	1.96361	1.67771	1.87013	2.08991	2.21621	1.91975	1.84334				12	0.33325	0.451443	0.130106	0.371285	0.542851	0.686459	0.382557	0.321521						12	10.7848	16.123	4.80096	13.7005	12.0634	18.2085	10.899	9.05693				12	11.9546	8	4.1679	1.47358						12
	14	1.89092	1.97847	1.67821	1.89038	2.09734	2.21621	1.89367	1.8595				14	0.362276	0.466309	0.130605	0.391534	0.550285	0.686459	0.356473	0.337681						14	11.7241	16.6539	4.81935	14.4477	12.2285	18.2085	10.1559	9.51214				14	12.2188	8	4.26099	1.50649						14
	16	1.91462	1.99591	1.713	1.91887	2.08741	2.17891	1.86758	1.8856				16	0.385979	0.483742	0.165396	0.42002	0.540347	0.649151	0.33039	0.363784						16	12.4912	17.2765	6.10317	15.4989	12.0077	17.2189	9.41281	10.2474				16	12.5321	8	3.96114	1.40047						16
	18	1.88499	1.9988	1.71579	1.94163	2.09631	2.19383	1.85019	1.8853				18	0.35635	0.486634	0.168187	0.442785	0.549255	0.664074	0.313001	0.363489						18	11.5324	17.3798	6.20617	16.3389	12.2057	17.6147	8.9174	10.2391				18	12.5543	8	4.19639	1.48365						18
	20	1.96595	1.99788	1.71878	1.93523	2.05482	2.11175	1.88497	1.90446				20	0.437303	0.485717	0.171178	0.436379	0.507758	0.581998	0.347779	0.382644						20	14.1522	17.347	6.31653	16.1025	11.2835	15.4376	9.90822	10.7787				20	12.6658	8	3.72265	1.31615						20
	22	1.99708	2.0089	1.71948	1.9644	2.06406	2.11921	1.85889	1.92247				22	0.468438	0.496736	0.171876	0.465551	0.516998	0.589459	0.321695	0.40065						22	15.1598	17.7406	6.34228	17.179	11.4889	15.6355	9.16511	11.2859				22	12.9996	8	4.06731	1.43801						22
	24	2.06407	2.00312	1.71818	1.97115	2.05371	2.10429	1.85889	1.93913				24	0.53543	0.490959	0.17058	0.472301	0.506648	0.574536	0.321695	0.417317						24	17.3278	17.5342	6.29446	17.4281	11.2588	15.2397	9.16511	11.7554				24	13.2505	8	4.27054	1.50987						24
	26	2.14824	1.99205	1.75108	1.966	2.05563	2.11921	1.85889	1.96434				26	0.619596	0.479888	0.203477	0.467153	0.508574	0.589459	0.321695	0.442528						26	20.0516	17.1388	7.50838	17.2381	11.3016	15.6355	9.16511	12.4656				26	13.8131	8	4.38355	1.54982						26

	Respuesta BW723C86 10-4 expresada en gramos de tensión												Respuesta BW723C86 10-4 menos la basal														Respuesta BW723C86 10-4 expresada como porcentaje a 100% KCl																						como % de 5-HT
	Respuestas	Cobayo 1	Cobayo 2	Cobayo 3	cobayo 4	Cobayo 5	Cobayo 6	Cobayo 7	Cobayo 8				Respuestas	Cobayo 1	Cobayo 2	Cobayo 3	cobayo 4	Cobayo 5	Cobayo 6	Cobayo 7	Cobayo 8						Respuestas	Cobayo 1	Cobayo 2	Cobayo 3	cobayo 4	Cobayo 5	Cobayo 6	Cobayo 7	Cobayo 8
	Basal KCl 80 mM	1.39	1.46	1.47	1.5	1.43	1.45	1.48	1.53				Basal KCl 80 mM	1.39	1.46	1.47	1.5	1.43	1.45	1.48	1.53						Basal KCl 80 mM	1.39	1.46	1.47	1.5	1.43	1.45	1.48	1.53
	Máx KCl 80 mM	5.3	5.8	5.52	5.27	3.9	5.2	5.7	4.98				Máx KCl 80 mM	5.3	5.8	5.52	5.27	3.9	5.2	5.7	4.98						Máx KCl 80 mM	5.3	5.8	5.52	5.27	3.9	5.2	5.7	4.98
	Diferencia	3.91	4.34	4.05	3.77	2.47	3.75	4.22	3.45				Diferencia	3.91	4.34	4.05	3.77	2.47	3.75	4.22	3.45						Diferencia	3.91	4.34	4.05	3.77	2.47	3.75	4.22	3.45				Promedio de las respuestas a BW723C86 10-4 expresada como porcentaje a 100% KCl
	Basal BW723C86	1.48877	1.41405	1.52069	1.55664	1.52026	1.52198	1.54501	1.50597				Basal BW723C86	1.48877	1.41405	1.52069	1.55664	1.52026	1.52198	1.54501	1.50597						Basal BW723C86	1.48877	1.41405	1.52069	1.55664	1.52026	1.52198	1.54501	1.50597
	Máx BW723C86	1.6	1.47655	1.53808	1.59697	1.55	1.6	1.67	1.51				Máx BW723C86	1.6	1.47655	1.53808	1.59697	1.55	1.6	1.67	1.51						Máx BW723C86	1.6	1.47655	1.53808	1.59697	1.55	1.6	1.67	1.51
	Diferencia	0.111234	0.062504	0.0173889	0.0403245	0.0297448	0.0780169	0.124995	0.00402819				Diferencia	0.111234	0.062504	0.0173889	0.0403245	0.0297448	0.0780169	0.124995	0.00402819						Diferencia	0.111234	0.062504	0.0173889	0.0403245	0.0297448	0.0780169	0.124995	0.00402819					PROMEDIO	n	DE	EE
T (min)	0	1.48877	1.41405	1.52069	1.55664	1.52026	1.52198	1.54501	1.50597			T (min)	0	0	0	0	0	0	0	0	0					T (min)	0	0	0	0	0	0	0	0	0				0	0	8	0	0						0
	2	1.48877	1.41405	1.51199	1.59697	1.49586	1.5313	1.56363	1.44807				2	2.66454e-15	0	-0.00869447	0.0403245	-0.0243945	0.00932057	0.0186284	-0.0579063						2	6.81467e-14	0	-0.214678	1.06962	-0.987633	0.248548	0.441431	-1.67844				2	-0.140145	8	0.852079	0.301255						2
	4	1.52637	1.3828	1.53808	1.5889	1.48773	1.54435	1.58715	1.45316				4	0.0376017	-0.031252	0.0173889	0.0322596	-0.0325261	0.0223692	0.0421447	-0.0528141						4	0.961682	-0.720092	0.429356	0.855692	-1.31684	0.596512	0.99869	-1.53084				4	0.0342688	8	1.05433	0.372762						4
	6	1.53389	1.39842	1.51199	1.5889	1.51212	1.55029	1.59532	1.46278				6	0.0451221	-0.015626	-0.00869447	0.0322596	-0.00813152	0.028306	0.0503189	-0.0431878						6	1.15402	-0.360046	-0.214678	0.855692	-0.329211	0.754827	1.19239	-1.25182				6	0.225147	8	0.886498	0.313424						6
	8	1.54893	1.3828	1.48591	1.54858	1.52839	1.54658	1.61014	1.45955				8	0.0601628	-0.031252	-0.0347779	-0.0080649	0.00813152	0.0246	0.0651349	-0.0464256						8	1.53869	-0.720092	-0.858713	-0.213923	0.329211	0.656	1.54348	-1.34567				8	0.116123	8	1.08846	0.38483						8
	10	1.53389	1.3828	1.49461	1.57277	1.52839	1.55001	1.63396	1.47241				10	0.0451221	-0.031252	-0.0260834	0.0161298	0.00813152	0.0280285	0.088958	-0.0335641						10	1.15402	-0.720092	-0.644035	0.427846	0.329211	0.747426	2.10801	-0.972871				10	0.303689	8	1.0534	0.372432						10
	12	1.51885	1.41405	1.5033	1.56471	1.52839	1.54379	1.63382	1.4688				12	0.0300814	0	-0.0173889	0.0080649	0.00813152	0.0218072	0.0888129	-0.0371719						12	0.769345	0	-0.429356	0.213923	0.329211	0.581526	2.10457	-1.07745				12	0.311472	8	0.932167	0.329571						12
	14	1.51133	1.40624	1.48591	1.58084	1.54465	1.56255	1.64444	1.48424				14	0.022561	-0.007813	-0.0347779	0.0241947	0.0243945	0.040567	0.09943	-0.0217294						14	0.577009	-0.180023	-0.858713	0.641769	0.987633	1.08179	2.35616	-0.629839				14	0.496973	8	1.04421	0.369184						14
	16	1.50381	1.41405	1.5033	1.54858	1.52026	1.55626	1.64102	1.46765				16	0.0150407	0	-0.0173889	-0.0080649	0	0.0342766	0.0960131	-0.0383198						16	0.384673	0	-0.429356	-0.213923	0	0.914043	2.27519	-1.11072				16	0.227489	8	1.01487	0.358811						16
	18	1.48877	1.46874	1.5033	1.54051	1.52026	1.56244	1.64124	1.46723				18	0	0.054691	-0.0173889	-0.0161298	0	0.0404524	0.0962308	-0.0387376						18	0	1.26016	-0.429356	-0.427846	0	1.07873	2.28035	-1.12283				18	0.329901	8	1.11542	0.394361						18
	20	1.4662	1.47655	1.52069	1.54858	1.51212	1.57219	1.64311	1.47012				20	-0.022561	0.062504	0	-0.0080649	-0.00813152	0.0502036	0.098106	-0.0358477						20	-0.577009	1.44018	0	-0.213923	-0.329211	1.33876	2.32479	-1.03906				20	0.368066	8	1.18044	0.417347						20
	22	1.48877	1.46874	1.5033	1.54858	1.54465	1.56893	1.64375	1.4776				22	0	0.054691	-0.0173889	-0.0080649	0.0243945	0.0469443	0.0987398	-0.0283726						22	0	1.26016	-0.429356	-0.213923	0.987633	1.25185	2.33981	-0.822393				22	0.546722	8	1.07706	0.380799						22
	24	1.47373	1.46874	1.52069	1.52438	1.54465	1.56757	1.64848	1.47239				24	-0.0150407	0.054691	0	-0.0322596	0.0243945	0.0455832	0.103471	-0.0335787						24	-0.384673	1.26016	0	-0.855692	0.987633	1.21555	2.45193	-0.973294				24	0.462702	8	1.20521	0.426105						24
	26	1.47373	1.47655	1.49461	1.53245	1.53652	1.56075	1.65844	1.47316				26	-0.0150407	0.062504	-0.0260834	-0.0241947	0.016263	0.0387664	0.113439	-0.0328075						26	-0.384673	1.44018	-0.644035	-0.641769	0.658422	1.03377	2.68813	-0.950942				26	0.399886	8	1.27627	0.451229						26

																																																	como % de 5-HT
[truncated: 24 more columns]

## Sheet: Agonistas S
Registros de contracción de aorta cobayos control frente a 5-HT, TCB-2, BW723C86 y WAY 161503
	VALORES ABSOLUTOS												VALORES EN FUNCIÓN DE LA BASAL														VALORES EN FUNCIÓN DE K+ 80 mM
	Respuesta 5-HT 10-4 expresada en gramos de tensión												Respuesta 5-HT 10-4 menos la respuesta basal														Respuesta 5-HT 10-4 expresada como porcentaje a 100% KCl
	Respuestas	Cobayo 1 200716	Cobayo 2 20716	Cobayo 3 210716	cobayo 4 210716	Cobayo 5	Cobayo 6	Cobayo 7	Cobayo 8				Respuestas	Cobayo 1	Cobayo 2	Cobayo 3	cobayo 4	Cobayo 5	Cobayo 6	Cobayo 7	Cobayo 8						Respuestas	Cobayo 1	Cobayo 2	Cobayo 3	cobayo 4	Cobayo 5	Cobayo 6	Cobayo 7	Cobayo 8
	Basal KCl 80 mM	1.51	1.46	1.51	1.51	1.48	1.5	1.45	1.45				Basal KCl 80 mM	1.51	1.46	1.51	1.51	1.48	1.5	1.45	1.45						Basal KCl 80 mM	1.51	1.46	1.51	1.51	1.48	1.5	1.45	1.45
	Máx KCl 80 mM	4.7	4.3	5.23	4.17	4.46	4.96	5.1	4				Máx KCl 80 mM	4.7	4.3	5.23	4.17	4.46	4.96	5.1	4						Máx KCl 80 mM	4.7	4.3	5.23	4.17	4.46	4.96	5.1	4
	Diferencia	3.19	2.84	3.72	2.66	2.98	3.46	3.65	2.55				Diferencia	3.19	2.84	3.72	2.66	2.98	3.46	3.65	2.55						Diferencia	3.19	2.84	3.72	2.66	2.98	3.46	3.65	2.55				Promedio de las respuestas a 5-HT 10-4 expresada como porcentaje a 100% KCl
	Basal 5-HT	1.53999	1.55117	1.58655	1.57745	1.55291	1.50108	1.52789	1.56702				Basal 5-HT	1.53999	1.55117	1.58655	1.57745	1.55291	1.50108	1.52789	1.56702						Basal 5-HT	1.53999	1.55117	1.58655	1.57745	1.55291	1.50108	1.52789	1.56702
	Máx 5-HT	3.19	3.48	3.91	3.17	3	3.53	3.49	3.45				Máx 5-HT	3.19	3.48	3.91	3.17	3	3.53	3.49	3.45						Máx 5-HT	3.19	3.48	3.91	3.17	3	3.53	3.49	3.45									T Student (1 COLA)
	Diferencia	1.65001	1.92883	2.32345	1.59255	1.44709	2.02892	1.96211	1.88298				Diferencia	1.65001	1.92883	2.32345	1.59255	1.44709	2.02892	1.96211	1.88298						Diferencia	1.65001	1.92883	2.32345	1.59255	1.44709	2.02892	1.96211	1.88298					PROMEDIO	n	DE	EE	5-HT CC vs CS
T (min)	0	1.53999	1.55117	1.58655	1.57745	1.55291	1.50108	1.52789	1.56702			T (min)	0	0	0	0	0	0	0	0	0					T (min)	0	0	0	0	0	0	0	0	0				0	0	8	0	0	#DIV/0!					0
	2	2.29565	2.08772	2.76966	1.75239	2.04227	2.57403	2.07095	2.16301				2	0.75566	0.536546	1.1831	0.174945	0.489357	1.07295	0.543055	0.595988						2	23.6884	18.8925	31.8039	6.57687	16.4214	31.0102	14.8782	23.3721				2	20.8304	8	8.45543	2.98944	0.410399					2
	4	3.01503	2.81677	3.51069	2.19462	2.49315	3.19845	2.70682	2.75381				4	1.47504	1.26561	1.92414	0.617169	0.940234	1.69738	1.17893	1.18679						4	46.2395	44.5636	51.7242	23.2019	31.5515	49.0571	32.2995	46.5407				4	40.6472	8	10.2227	3.61428	0.200289					4
	6	3.11553	3.10309	3.68543	2.53248	2.71971	3.42711	3.05756	3.01018				6	1.57554	1.55192	2.09887	0.955034	1.1668	1.92604	1.52966	1.44316						6	49.3901	54.645	56.4214	35.9035	39.1542	55.6658	41.9086	56.5943				6	48.7104	8	8.5128	3.00973	0.102675					6
	8	3.09217	3.18507	3.57993	2.684	2.77571	3.52385	3.18358	3.05618				8	1.55218	1.6339	1.99338	1.10656	1.22279	2.02278	1.65569	1.48916						8	48.6577	57.5317	53.5854	41.5998	41.0333	58.4618	45.3613	58.3983				8	50.5786	8	7.40001	2.6163	0.0964449					8
	10	3.03734	3.22554	3.53612	2.79903	2.82449	3.49747	3.20989	3.0963				10	1.49735	1.67437	1.94957	1.22158	1.27158	1.99639	1.682	1.52928						10	46.9388	58.9566	52.4078	45.9241	42.6705	57.6993	46.0823	59.9716				10	51.3314	8	6.82017	2.4113	0.0581181					10
	12	3.01714	3.2316	3.49122	2.79505	2.8242	3.47988	3.18155	3.08552				12	1.47715	1.68043	1.90467	1.21761	1.27129	1.97881	1.65366	1.5185						12	46.3057	59.1702	51.2009	45.7747	42.6607	57.1909	45.3058	59.549				12	50.8947	8	6.86007	2.4254	0.0590887					12
	14	3.01151	3.23641	3.54647	2.79965	2.82735	3.4447	3.17366	3.10247				14	1.47152	1.68524	1.95991	1.22221	1.27444	1.94363	1.64577	1.53545						14	46.1291	59.3395	52.6859	45.9477	42.7663	56.1742	45.0895	60.2138				14	51.0432	8	6.92841	2.44956	0.0535093					14
	16	3.03006	3.2841	3.55427	2.8007	2.82999	3.43591	3.23601	3.12976				16	1.49007	1.73293	1.96771	1.22325	1.27708	1.93483	1.70812	1.56274						16	46.7106	61.0185	52.8955	45.987	42.855	55.92	46.7978	61.284				16	51.6836	8	7.14866	2.52743	0.0505731					16
	18	3.05331	3.30355	3.70003	2.81963	2.85308	3.4535	3.29634	3.16907				18	1.51332	1.75238	2.11348	1.24218	1.30017	1.95242	1.76845	1.60205						18	47.4394	61.7034	56.8139	46.6986	43.6297	56.4284	48.4506	62.8255				18	52.9987	8	7.34571	2.5971	0.0311221	*				18
	20	3.10133	3.34705	3.74566	2.85623	2.87465	3.48868	3.34573	3.2059				20	1.56134	1.79588	2.15911	1.27878	1.32173	1.9876	1.81784	1.63887						20	48.9447	63.2351	58.0405	48.0745	44.3535	57.4451	49.8039	64.2696				20	54.2709	8	7.46122	2.63794	0.0220453	*				20
	22	3.13362	3.40561	3.76464	2.90318	2.88208	3.49747	3.39665	3.23888				22	1.59363	1.85444	2.17809	1.32573	1.32917	1.99639	1.86876	1.67186						22	49.9569	65.2971	58.5508	49.8396	44.603	57.6993	51.1988	65.563				22	55.3386	8	7.66433	2.70975	0.0184864	*				22
	24	3.15346	3.4512	3.82159	2.98317	2.91651	3.54144	3.4257	3.29312				24	1.61347	1.90003	2.23504	1.40573	1.3636	2.04037	1.89781	1.7261						24	50.5789	66.9024	60.0816	52.8469	45.7584	58.9702	51.9948	67.6901				24	56.8529	8	7.88712	2.78852	0.0156365	*				24
	26	3.11589	3.41021	3.85152	3.03786	2.93239	3.53265	3.46457	3.30799				26	1.5759	1.85904	2.26497	1.46042	1.37947	2.03157	1.93668	1.74097						26	49.4011	65.4591	60.8863	54.9029	46.291	58.716	53.0597	68.2735				26	57.1237	8	7.64312	2.70225	0.0121649	*				26

	Respuesta TCB-2 10-4 expresada en gramos de tensión												Respuesta TCB-2 10-4 menos la respuesta basal														Respuesta TCB-2 10-4 expresada como porcentaje a 100% KCl
	Respuestas	Cobayo 1	Cobayo 2	Cobayo 3	cobayo 4	Cobayo 5	Cobayo 6	Cobayo 7	Cobayo 8				Respuestas	Cobayo 1	Cobayo 2	Cobayo 3	cobayo 4	Cobayo 5	Cobayo 6	Cobayo 7	Cobayo 8						Respuestas	Cobayo 1	Cobayo 2	Cobayo 3	cobayo 4	Cobayo 5	Cobayo 6	Cobayo 7	Cobayo 8
	Basal KCl 80 mM	1.5	1.48	1.51	1.51	1.59	1.5	1.44	1.55				Basal KCl 80 mM	1.5	1.48	1.51	1.51	1.59	1.5	1.44	1.55						Basal KCl 80 mM	1.5	1.48	1.51	1.51	1.59	1.5	1.44	1.55
	Máx KCl 80 mM	5.95	5	4	4.2	3.1	3.8	4	4.2				Máx KCl 80 mM	5.95	5	4	4.2	3.1	3.8	4	4.2						Máx KCl 80 mM	5.95	5	4	4.2	3.1	3.8	4	4.2
	Diferencia	4.45	3.52	2.49	2.69	1.51	2.3	2.56	2.65				Diferencia	4.45	3.52	2.49	2.69	1.51	2.3	2.56	2.65						Diferencia	4.45	3.52	2.49	2.69	1.51	2.3	2.56	2.65				Promedio de las respuestas a TCB-2 10-4 expresada como porcentaje a 100% KCl
	Basal TCB-2	1.57766	1.49545	1.59995	1.5253	1.50174	1.55281	1.62581	1.55757				Basal TCB-2	1.57766	1.49545	1.59995	1.5253	1.50174	1.55281	1.62581	1.55757						Basal TCB-2	1.57766	1.49545	1.59995	1.5253	1.50174	1.55281	1.62581	1.55757
	Máx TCB-2	4	2.59	2.39	2.3	1.86	2.3	2.1	2.1				Máx TCB-2	4	2.59	2.39	2.3	1.86	2.3	2.1	2.1						Máx TCB-2	4	2.59	2.39	2.3	1.86	2.3	2.1	2.1									T
	Diferencia	2.42234	1.09455	0.790047	0.774702	0.358258	0.74719	0.47419	0.542428				Diferencia	2.42234	1.09455	0.790047	0.774702	0.358258	0.74719	0.47419	0.542428						Diferencia	2.42234	1.09455	0.790047	0.774702	0.358258	0.74719	0.47419	0.542428					PROMEDIO	n	DE	EE	TCB-2 CC vs CS
T (min)	0	1.57766	1.49545	1.59995	1.5253	1.50174	1.55281	1.62581	1.55757			T (min)	0	0	0	0	0	0	0	0	0					T (min)	0	0	0	0	0	0	0	0	0				0	0	8	0	0	#DIV/0!					0
	2	1.73446	1.7278	1.62754	1.59724	1.66851	1.60367	1.6771	1.65487				2	0.1568	0.232348	0.027582	0.0719415	0.166763	0.0508626	0.05129	0.0973024						2	3.5236	6.6008	1.10771	2.6744	11.0439	2.21142	2.00352	3.67179				2	4.10464	8	3.24995	1.14903	0.338167					2
	4	2.00216	2.05453	1.63143	1.87781	1.76856	1.82408	1.83097	1.84063				4	0.424498	0.559077	0.0314805	0.352513	0.26682	0.271267	0.20516	0.283062						4	9.53929	15.8829	1.26428	13.1046	17.6702	11.7942	8.01407	10.6816				4	10.9939	8	5.06147	1.7895	0.0347125	*				4
	6	2.48621	2.20096	1.76506	2.06486	1.80192	2.03601	1.9421	1.94678				6	0.908551	0.70551	0.165102	0.539561	0.300173	0.483195	0.316289	0.38921						6	20.4169	20.0429	6.63061	20.058	19.879	21.0085	12.355	14.6872				6	16.8848	8	5.19595	1.83705	0.00701086	**				6
	8	3.01241	2.30473	1.77929	2.15838	1.82693	2.14621	2.00194	2.05293				8	1.43475	0.809272	0.179332	0.633085	0.325187	0.593397	0.376127	0.495358						8	32.2415	22.9907	7.20208	23.5348	21.5356	25.7999	14.6925	18.6927				8	20.8362	8	7.51533	2.65707	0.0148871	*				8
	10	3.31839	2.38057	1.94448	2.23752	1.83527	2.23098	2.06178	2.09716				10	1.74073	0.88512	0.344531	0.712221	0.333525	0.678168	0.435965	0.539586						10	39.1175	25.1454	13.8366	26.4766	22.0878	29.4856	17.0299	20.3617				10	24.1926	8	7.879	2.78565	0.00731319	**				10
	12	3.48122	2.40231	2.0054	2.25191	1.82693	2.31575	2.09597	2.11485				12	1.90356	0.906856	0.405446	0.726609	0.325187	0.762939	0.470159	0.557278						12	42.7767	25.7629	16.283	27.0115	21.5356	33.1713	18.3656	21.0293				12	25.742	8	8.70777	3.07866	0.00853472	**				12
	14	3.53613	2.43903	2.08815	2.20874	1.82693	2.34966	2.11307	2.106				14	1.95847	0.943578	0.488192	0.683444	0.325187	0.796848	0.487255	0.548432						14	44.0105	26.8062	19.6061	25.4068	21.5356	34.6456	19.0334	20.6955				14	26.4675	8	8.74939	3.09338	0.00799085	**				14
	16	3.55572	2.45848	2.13756	2.20155	1.79358	2.38357	2.10452	2.11485				16	1.97806	0.963027	0.537605	0.67625	0.291835	0.830756	0.478707	0.557278						16	44.4507	27.3587	21.5906	25.1394	19.3268	36.1198	18.6995	21.0293				16	26.7144	8	9.12864	3.22746	0.00944511	**				16
	18	3.57135	2.47084	2.16261	2.20874	1.81859	2.32423	2.11307	2.13254				18	1.99369	0.975382	0.562653	0.683444	0.316849	0.771417	0.487255	0.574969						18	44.802	27.7097	22.5965	25.4068	20.9834	33.5399	19.0334	21.6969				18	26.9711	8	8.53475	3.01749	0.00478522	**				18
	20	3.62991	2.44681	2.18005	2.19435	1.76856	2.26489	2.13016	2.1237				20	2.05225	0.951358	0.580099	0.669056	0.26682	0.712077	0.504352	0.566123						20	46.118	27.0272	23.2972	24.872	17.6702	30.9599	19.7013	21.3631				20	26.3761	8	9.01108	3.1859	0.00905481	**				20
	22	3.66632	2.49223	2.19448	2.17277	1.76856	2.19707	2.10452	2.14139				22	2.08866	0.996775	0.594524	0.647473	0.26682	0.64426	0.478707	0.583815						22	46.9361	28.3175	23.8764	24.0696	17.6702	28.0113	18.6995	22.0307				22	26.2014	8	9.21247	3.2571	0.0112303	*				22
	24	3.72617	2.51751	2.2359	2.15838	1.75189	2.12925	2.11307	2.13254				24	2.14851	1.02206	0.635945	0.633085	0.250144	0.576443	0.487255	0.574969						24	48.2811	29.0357	25.54	23.5348	16.5658	25.0627	19.0334	21.6969				24	26.0938	8	9.7747	3.45588	0.0132885	*				24
	26	3.84775	2.53376	2.26065	2.15119	1.76856	2.08687	2.12161	2.13254				26	2.27009	1.0383	0.660701	0.625891	0.26682	0.534058	0.495804	0.574969						26	51.0133	29.4972	26.5342	23.2673	17.6702	23.2199	19.3673	21.6969				26	26.5333	8	10.5762	3.73926	0.0171007	*				26

	Respuesta WAY 161503 10-4 expresada en gramos de tensión												Respuesta WAY 161503 10-4 menos la respuesta basal														Respuesta WAY 161503 10-4 expresada como porcentaje a 100% KCl																						como % de 5-HT
	Respuestas	Cobayo 1	Cobayo 2	Cobayo 3	cobayo 4	Cobayo 5	Cobayo 6	Cobayo 7	Cobayo 8				Respuestas	Cobayo 1	Cobayo 2	Cobayo 3	cobayo 4	Cobayo 5	Cobayo 6	Cobayo 7	Cobayo 8						Respuestas	Cobayo 1	Cobayo 2	Cobayo 3	cobayo 4	Cobayo 5	Cobayo 6	Cobayo 7	Cobayo 8
	Basal KCl 80 mM	1.54	1.55	1.53	1.54	1.38	1.45	1.52	1.48				Basal KCl 80 mM	1.54	1.55	1.53	1.54	1.38	1.45	1.52	1.48						Basal KCl 80 mM	1.54	1.55	1.53	1.54	1.38	1.45	1.52	1.48
	Máx KCl 80 mM	4.9	6	4.33	4.7	4	5	4.8	4				Máx KCl 80 mM	4.9	6	4.33	4.7	4	5	4.8	4						Máx KCl 80 mM	4.9	6	4.33	4.7	4	5	4.8	4
	Diferencia	3.36	4.45	2.8	3.16	2.62	3.55	3.28	2.52				Diferencia	3.36	4.45	2.8	3.16	2.62	3.55	3.28	2.52						Diferencia	3.36	4.45	2.8	3.16	2.62	3.55	3.28	2.52				Promedio de las respuestas a WAY 161503 10-4 expresada como porcentaje a 100% KCl
	Basal WAY 161503	1.47063	1.44095	1.51557	1.62149	1.52206	1.52601	1.56853	1.5308				Basal WAY 161503	1.47063	1.44095	1.51557	1.62149	1.52206	1.52601	1.56853	1.5308						Basal WAY 161503	1.47063	1.44095	1.51557	1.62149	1.52206	1.52601	1.56853	1.5308
	Máx WAY 161503	1.77838	2	2.1	2.2	1.93	2.1	2.2	2.1				Máx WAY 161503	1.77838	2	2.1	2.2	1.93	2.1	2.2	2.1						Máx WAY 161503	1.77838	2	2.1	2.2	1.93	2.1	2.2	2.1									T
	Diferencia	0.30774	0.559047	0.584427	0.578507	0.407938	0.573994	0.631467	0.569196				Diferencia	0.30774	0.559047	0.584427	0.578507	0.407938	0.573994	0.631467	0.569196						Diferencia	0.30774	0.559047	0.584427	0.578507	0.407938	0.573994	0.631467	0.569196					PROMEDIO	n	DE	EE	WAY 161503 CC vs CS
T (min)	0	1.47063	1.44095	1.51557	1.62149	1.52206	1.52601	1.56853	1.5308			T (min)	0	0	0	0	0	0	0	0	0					T (min)	0	0	0	0	0	0	0	0	0				0	0	8	0	0	#DIV/0!					0
	2	1.56467	1.55905	1.54948	1.67864	1.59786	1.59573	1.61406	1.62372				2	0.0940318	0.118102	0.0339084	0.057149	0.0757978	0.0697198	0.0455287	0.0929137						2	2.79856	2.65398	1.21102	1.80851	2.89305	1.96394	1.38807	3.68705				2	2.30052	8	0.846967	0.299448	0.0698604					2
	4	1.65015	1.74802	1.55557	1.82151	1.70371	1.70837	1.68854	1.72836				4	0.179515	0.307065	0.04	0.200022	0.181651	0.182362	0.120011	0.19756						4	5.34271	6.90035	1.42857	6.3298	6.93323	5.13697	3.65887	7.83968				4	5.44627	8	2.07975	0.735302	0.200332					4
	6	1.67579	1.89761	1.65121	2.00725	1.81786	1.85202	1.82923	1.85298				6	0.20516	0.456661	0.135634	0.385756	0.295803	0.326017	0.260695	0.322172						6	6.10596	10.2621	4.84406	12.2075	11.2902	9.18358	7.94801	12.7846				6	9.32824	8	2.86293	1.0122	0.333951					6
	8	1.68434	1.98422	1.7275	2.09297	1.88216	1.9349	1.91024	1.9112				8	0.213709	0.54327	0.211928	0.471479	0.360096	0.408892	0.341704	0.380398						8	6.36037	12.2083	7.56884	14.9202	13.7441	11.5181	10.4178	15.0952				8	11.4791	8	3.23373	1.14329	0.246956					8
	10	1.70144	2.03146	1.84618	2.15012	1.9422	2.00926	1.99815	1.98199				10	0.230805	0.59051	0.330607	0.528628	0.420138	0.483249	0.429618	0.451186						10	6.8692	13.2699	11.8074	16.7287	16.0358	13.6126	13.0981	17.9042				10	13.6658	8	3.44533	1.21811	0.100906					10
	12	1.70144	2.03934	1.95638	2.15726	1.9735	2.05099	2.05682	2.02507				12	0.230805	0.598384	0.440809	0.535772	0.451443	0.524988	0.488291	0.494266						12	6.8692	13.4468	15.7432	16.9548	17.2306	14.7884	14.8869	19.6137				12	14.9417	8	3.76428	1.33087	0.0990384					12
	14	1.70144	2.05508	2.00725	2.15012	1.98837	2.07082	2.07868	2.0377				14	0.230805	0.614131	0.491672	0.528628	0.466309	0.54481	0.51015	0.506895						14	6.8692	13.8007	17.5597	16.7287	17.7981	15.3468	15.5534	20.1149				14	15.4714	8	3.95923	1.3998	0.0998037					14
	16	1.74418	1.99997	2.07506	2.16441	2.0058	2.07981	2.11974	2.04651				16	0.273547	0.559017	0.559489	0.542916	0.483742	0.553807	0.551202	0.515707						16	8.14128	12.5622	19.9817	17.1809	18.4634	15.6002	16.8049	20.4645				16	16.1499	8	4.09626	1.44825	0.0913753					16
	18	1.75273	1.9606	2.11745	2.16441	2.0087	2.08082	2.14093	2.03601				18	0.282095	0.519649	0.601874	0.542916	0.486634	0.554813	0.572395	0.505209						18	8.39569	11.6775	21.4955	17.1809	18.5738	15.6285	17.4511	20.048				18	16.3064	8	4.35247	1.53883	0.095888					18
	20	1.76983	1.93698	2.11745	2.16726	2.00528	2.07056	2.13736	2.02296				20	0.299192	0.496029	0.601874	0.545772	0.483217	0.544558	0.568823	0.492161						20	8.90452	11.1467	21.4955	17.2713	18.4434	15.3397	17.3422	19.5302				20	16.1842	8	4.24458	1.50069	0.109917					20
	22	1.77838	1.93698	2.1344	2.18584	2.0188	2.08574	2.16012	2.03026				22	0.30774	0.496029	0.618829	0.564347	0.496736	0.559735	0.591588	0.499458						22	9.15894	11.1467	22.101	17.8591	18.9594	15.7672	18.0362	19.8198				22	16.606	8	4.40201	1.55635	0.117535					22
	24	1.77838	1.85825	2.14288	2.19298	2.00302	2.0847	2.16793	2.01505				24	0.307744	0.417294	0.627306	0.57149	0.480959	0.558697	0.599398	0.484242						24	9.15905	9.37739	22.4038	18.0851	18.3572	15.7379	18.2743	19.216				24	16.3263	8	4.72534	1.67066	0.170294					24
	26	1.78692	1.87399	2.14288	2.16441	2.00195	2.08043	2.15364	2.01485				26	0.316289	0.433041	0.627306	0.542916	0.479888	0.554421	0.585111	0.484051						26	9.41335	9.73126	22.4038	17.1809	18.3163	15.6175	17.8387	19.2084				26	16.2138	8	4.53407	1.60304	0.227011					26

	Respuesta BW723C86 10-4 expresada en gramos de tensión												Respuesta BW723C86 10-4 menos la basal														Respuesta BW723C86 10-4 expresada como porcentaje a 100% KCl																						como % de 5-HT
	Respuestas	Cobayo 1	Cobayo 2	Cobayo 3	cobayo 4	Cobayo 5	Cobayo 6	Cobayo 7	Cobayo 8				Respuestas	Cobayo 1	Cobayo 2	Cobayo 3	cobayo 4	Cobayo 5	Cobayo 6	Cobayo 7	Cobayo 8						Respuestas	Cobayo 1	Cobayo 2	Cobayo 3	cobayo 4	Cobayo 5	Cobayo 6	Cobayo 7	Cobayo 8
	Basal KCl 80 mM	1.51	1.53	1.52	1.51	1.46	1.47	1.5	1.51				Basal KCl 80 mM	1.51	1.53	1.52	1.51	1.46	1.47	1.5	1.51						Basal KCl 80 mM	1.51	1.53	1.52	1.51	1.46	1.47	1.5	1.51
	Máx KCl 80 mM	5.4	4.8	5.3	6	5.8	5.52	5.5	5.8				Máx KCl 80 mM	5.4	4.8	5.3	6	5.8	5.52	5.5	5.8						Máx KCl 80 mM	5.4	4.8	5.3	6	5.8	5.52	5.5	5.8
	Diferencia	3.89	3.27	3.78	4.49	4.34	4.05	4	4.29				Diferencia	3.89	3.27	3.78	4.49	4.34	4.05	4	4.29						Diferencia	3.89	3.27	3.78	4.49	4.34	4.05	4	4.29				Promedio de las respuestas a BW723C86 10-4 expresada como porcentaje a 100% KCl
	Basal BW723C86	1.5817	1.53654	1.72252	1.58011	1.55927	1.57563	1.53465	1.5838				Basal BW723C86	1.5817	1.53654	1.72252	1.58011	1.55927	1.57563	1.53465	1.59828						Basal BW723C86	1.5817	1.53654	1.72252	1.58011	1.55927	1.57563	1.53465	1.59828
	Máx BW723C86	1.72	1.67	1.9	1.69	1.63102	1.64226	1.61	1.8				Máx BW723C86	1.72	1.67	1.9	1.69	1.63102	1.64226	1.61	1.8						Máx BW723C86	1.72	1.67	1.9	1.69	1.63102	1.64226	1.61	1.8									T
	Diferencia	0.138303	0.133464	0.177475	0.109892	0.0717501	0.0666295	0.075353	0.216203				Diferencia	0.138303	0.133464	0.177475	0.109892	0.0717501	0.0666295	0.075353	0.20172						Diferencia	0.138303	0.133464	0.177475	0.109892	0.0717501	0.0666295	0.075353	0.20172					PROMEDIO	n	DE	EE	BW723C86 CC vs CS
T (min)	0	1.5817	1.53654	1.72252	1.58011	1.55927	1.57563	1.53465	1.5838			T (min)	0	0	0	0	0	0	0	0	0					T (min)	0	0	0	0	0	0	0	0	0				0	0	8	0	0	#DIV/0!					0
	2	1.58333	1.55457	1.71327	1.5434	1.55343	1.5706	1.54696	1.57938				2	0.00163189	0.0180308	-0.00925224	-0.0367099	-0.00583233	-0.00502502	0.0123081	-0.00441345						2	0.0419509	0.551399	-0.244768	-0.817593	-0.134386	-0.124075	0.307702	-0.102878				2	-0.0653309	8	0.403333	0.1426	0.41282					2
	4	1.58833	1.5555	1.71975	1.57918	1.56061	1.58654	1.5661	1.59362				4	0.00662956	0.0189634	-0.00277567	-0.000925461	0.00133812	0.0109078	0.0314574	0.00982758						4	0.170426	0.57992	-0.0734305	-0.0206116	0.0308323	0.269328	0.786434	0.229081				4	0.246497	8	0.299887	0.106026	0.296289					4
	6	1.61372	1.56907	1.68778	1.58278	1.56063	1.58116	1.57469	1.5917				6	0.0320259	0.0325383	-0.0347473	0.00267355	0.00136165	0.00552953	0.0400455	0.0079002						6	0.823287	0.995054	-0.91924	0.0595446	0.0313745	0.136532	1.00114	0.184154				6	0.28898	8	0.644118	0.22773	0.435742					6
	8	1.63208	1.57923	1.72479	1.59265	1.56624	1.58858	1.58267	1.60471				8	0.0503846	0.0426935	0.00226166	0.0125451	0.00697584	0.0129543	0.0480274	0.0209096						8	1.29523	1.30561	0.0598322	0.279402	0.160734	0.319859	1.20069	0.487404				8	0.638596	8	0.5357	0.189399	0.121652					8
	10	1.61974	1.58327	1.79027	1.60797	1.57978	1.60813	1.59288	1.62606				10	0.0380434	0.0467349	0.0677469	0.0278666	0.0205094	0.0325016	0.0582351	0.0422658						10	0.977981	1.4292	1.79225	0.620638	0.472567	0.802508	1.45588	0.985216				10	1.06703	8	0.454432	0.160666	0.040398	*				10
	12	1.63718	1.59467	1.77722	1.61116	1.5896	1.61109	1.59061	1.62807				12	0.0554843	0.0581337	0.054691	0.0310543	0.0303291	0.0354632	0.0559599	0.0442719						12	1.42633	1.77779	1.44685	0.691634	0.698826	0.875634	1.399	1.03198				12	1.16851	8	0.400129	0.141467	0.0157445	*				12
	14	1.63626	1.60337	1.78667	1.63749	1.59266	1.61803	1.60207	1.63906				14	0.0545663	0.0668382	0.0641488	0.0573786	0.0333902	0.0424007	0.0674263	0.0552638						14	1.40273	2.04398	1.69706	1.27792	0.769359	1.04693	1.68566	1.2882				14	1.40148	8	0.402548	0.142322	0.019176	*				14
	16	1.59547	1.60182	1.81813	1.6343	1.59451	1.6244	1.59436	1.6436				16	0.0137691	0.0652838	0.0956064	0.0541909	0.0352435	0.0487748	0.0597132	0.0598021						16	0.353961	1.99645	2.52927	1.20692	0.812063	1.20432	1.49283	1.39399				16	1.37372	8	0.670775	0.237155	0.00923922	**				16
	18	1.62372	1.57944	1.81371	1.64304	1.60532	1.62378	1.59785	1.64287				18	0.0420212	0.0429008	0.0911859	0.0629313	0.0460569	0.0481485	0.0632052	0.0590714						18	1.08024	1.31195	2.41233	1.40159	1.06122	1.18885	1.58013	1.37696				18	1.42666	8	0.434488	0.153615	0.0106649	*				18
	20	1.63555	1.59394	1.8096	1.66361	1.61666	1.63436	1.60164	1.65231				20	0.0538524	0.0574083	0.0870738	0.0834971	0.0573893	0.0587274	0.0669958	0.0685153						20	1.38438	1.7556	2.30354	1.85962	1.32233	1.45006	1.67489	1.59709				20	1.66844	8	0.316409	0.111868	0.00468599	**				20
	22	1.64289	1.59436	1.80446	1.6633	1.61284	1.63021	1.60298	1.65037				22	0.0611959	0.0578228	0.0819337	0.0831886	0.0535738	0.0545775	0.0683351	0.0665719						22	1.57316	1.76828	2.16756	1.85275	1.23442	1.34759	1.70838	1.55179				22	1.65049	8	0.294249	0.104033	0.00714485	**				22
	24	1.64687	1.60068	1.83931	1.66546	1.62362	1.64226	1.60379	1.66153				24	0.0651736	0.0641439	0.116784	0.085348	0.0643567	0.0666295	0.0691443	0.0777344						24	1.67541	1.96159	3.08952	1.90085	1.48287	1.64517	1.72861	1.81199				24	1.912	8	0.499154	0.176478	0.00359964	**				24
	26	1.65207	1.60508	1.83118	1.65661	1.63102	1.64911	1.60617	1.67387				26	0.0703753	0.0685474	0.108653	0.0765047	0.0717501	0.0734825	0.0715232	0.0900768						26	1.80913	2.09625	2.87441	1.70389	1.65323	1.81438	1.78808	2.09969				26	1.97988	8	0.397183	0.140425	0.00241357	**				26

																																																	como % de 5-HT
[truncated: 17 more columns]

## Sheet: Antagonistas C
Registros de contracción de aorta cobayos control frente a 5-HT (100µM) y MDL 100907, RS-127445, RS-102221 (10 nM)
	VALORES ABSOLUTOS												VALORES EN FUNCIÓN DE LA BASAL														VALORES EN FUNCIÓN DE K+ 80 mM
	Respuesta 5-HT 10-4 expresada en gramos de tensión												Respuesta 5-HT 10-4 menos la respuesta basal														Respuesta 5-HT 10-4 expresada como porcentaje a 100% KCl
	Respuestas	Cobayo 1 200716	Cobayo 2 20716	Cobayo 3 210716	cobayo 4 210716	Cobayo 5	Cobayo 6	Cobayo 7	Cobayo 8				Respuestas	Cobayo 1	Cobayo 2	Cobayo 3	cobayo 4	Cobayo 5	Cobayo 6	Cobayo 7	Cobayo 8						Respuestas	Cobayo 1	Cobayo 2	Cobayo 3	cobayo 4	Cobayo 5	Cobayo 6	Cobayo 7	Cobayo 8
	Basal KCl 80 mM	1.5	1.46	1.52	1.41	1.45	1.52	1.44	1.42				Basal KCl 80 mM	1.5	1.46	1.52	1.41	1.45	1.52	1.44	1.42						Basal KCl 80 mM	1.5	1.46	1.52	1.41	1.45	1.52	1.44	1.42
	Máx KCl 80 mM	4.96	3.43	4.17	4.3	5.93	4.92	5.61	7.46				Máx KCl 80 mM	4.96	3.43	4.17	4.3	5.93	4.92	5.61	7.46						Máx KCl 80 mM	4.96	3.43	4.17	4.3	5.93	4.92	5.61	7.46
	Diferencia	3.46	1.97	2.65	2.89	4.48	3.4	4.17	6.04				Diferencia	3.46	1.97	2.65	2.89	4.48	3.4	4.17	6.04						Diferencia	3.46	1.97	2.65	2.89	4.48	3.4	4.17	6.04				Promedio de las respuestas a 5-HT 10-4 expresada como porcentaje a 100% KCl
	Basal 5-HT	1.50108	1.52519	1.61739	1.53032	1.49482	1.58035	1.69361	1.54751				Basal 5-HT	1.50108	1.52519	1.61739	1.53032	1.49482	1.58035	1.69361	1.54751						Basal 5-HT	1.50108	1.52519	1.61739	1.53032	1.49482	1.58035	1.69361	1.54751
	Máx 5-HT	3.53	2.76	2.96	2.67	3.59	3	3.58	4.16				Máx 5-HT	3.53	2.76	2.96	2.67	3.59	3	3.58	4.16						Máx 5-HT	3.53	2.76	2.96	2.67	3.59	3	3.58	4.16
	Diferencia	2.02892	1.23481	1.34261	1.13968	2.09518	1.41965	1.88639	2.61249				Diferencia	2.02892	1.23481	1.34261	1.13968	2.09518	1.41965	1.88639	2.61249						Diferencia	2.02892	1.23481	1.34261	1.13968	2.09518	1.41965	1.88639	2.61249					PROMEDIO	n	DE	EE
T (min)	0	1.50108	1.52519	1.61739	1.53032	1.49482	1.58035	1.69361	1.54751			T (min)	0	0	0	0	0	0	0	0	0					T (min)	0	0	0	0	0	0	0	0	0				0	0	8	0	0						0
	2	2.57403	2.057	2.05591	1.81151	2.57188	2.30946	3.16073	2.14644				2	1.07295	0.531808	0.438522	0.281192	1.07706	0.729115	1.46712	0.598925						2	31.0102	26.9953	16.548	9.72982	24.0415	21.4445	35.1828	9.91598				2	21.8585	8	9.33919	3.3019						2
	4	3.19845	2.46608	2.49443	2.06789	3.42252	2.64771	3.54759	2.66161				4	1.69738	0.94089	0.877045	0.537573	1.92769	1.06736	1.85397	1.1141						4	49.0571	47.7609	33.096	18.6011	43.0289	31.393	44.4598	18.4454				4	35.7303	8	12.362	4.37064						4
	6	3.42711	2.6788	2.76292	2.33254	3.54529	2.78301	3.52569	2.88025				6	1.92604	1.15361	1.14553	0.802224	2.05047	1.20266	1.83208	1.33274						6	55.6658	58.5591	43.2275	27.7586	45.7693	35.3724	43.9347	22.0652				6	41.5441	8	12.6654	4.4779						6
	8	3.52385	2.74426	2.89716	2.49795	3.53652	2.82811	3.33591	2.97721				8	2.02278	1.21907	1.27977	0.967631	2.0417	1.24776	1.6423	1.4297						8	58.4618	61.8816	48.2932	33.482	45.5736	36.6989	39.3837	23.6705				8	43.4307	8	12.7936	4.52324						8
	10	3.49747	2.68698	2.96875	2.5393	3.46636	2.84315	3.23373	2.99147				10	1.99639	1.1618	1.35136	1.00898	1.97154	1.2628	1.54011	1.44396						10	57.6993	58.9744	50.9949	34.9129	44.0076	37.1411	36.9331	23.9067				10	43.0712	8	12.1728	4.30372						10
	12	3.47988	2.68698	2.9419	2.61374	3.38744	2.85066	3.16803	2.98103				12	1.97881	1.1618	1.32452	1.08342	1.89262	1.27031	1.47442	1.43352						12	57.1909	58.9744	49.9818	37.4884	42.2459	37.3621	35.3578	23.7337				12	42.7919	8	11.9361	4.22003						12
	14	3.4447	2.66244	2.96875	2.65509	3.37867	2.8657	3.17533	3.00084				14	1.94363	1.13725	1.35136	1.12477	1.88385	1.28535	1.48172	1.45333						14	56.1742	57.7284	50.9949	38.9193	42.0502	37.8043	35.5328	24.0617				14	42.9082	8	11.4224	4.03844						14
	16	3.43591	2.71971	2.93296	2.64682	3.33482	2.90328	3.21183	2.97153				16	1.93483	1.19452	1.31557	1.1165	1.84	1.32293	1.51821	1.42402						16	55.92	60.6356	49.644	38.6331	41.0714	38.9097	36.408	23.5765				16	43.0998	8	11.8457	4.1881						16
	18	3.4535	2.68698	2.93296	2.65509	3.3699	2.94838	3.19723	2.98598				18	1.95242	1.1618	1.31557	1.12477	1.87508	1.36803	1.50362	1.43847						18	56.4284	58.9744	49.644	38.9193	41.8544	40.2362	36.058	23.8157				18	43.2413	8	11.4705	4.05544						18
	20	3.48868	2.70335	2.90611	2.63028	3.35236	2.97093	3.24832	2.96292				20	1.9876	1.17816	1.28872	1.09996	1.85754	1.39058	1.55471	1.4154						20	57.4451	59.805	48.6309	38.0608	41.4629	40.8994	37.2832	23.4339				20	43.3776	8	11.7614	4.1583						20
	22	3.49747	2.74426	2.83451	2.66336	3.41375	2.97845	3.27752	2.97054				22	1.99639	1.21907	1.21712	1.13304	1.91892	1.3981	1.58391	1.42303						22	57.6993	61.8816	45.9292	39.2054	42.8331	41.1205	37.9834	23.5601				22	43.7766	8	11.9366	4.22022						22
	24	3.54144	2.7688	2.87926	2.67028	3.38744	3.03858	3.23373	2.97899				24	2.04037	1.24361	1.26187	1.13996	1.89262	1.45823	1.54011	1.43148						24	58.9702	63.1275	47.6178	39.4448	42.2459	42.8891	36.9331	23.7				24	44.3661	8	12.4733	4.40996						24
	26	3.53265	2.7688	2.85241	2.69311	3.40498	2.98596	3.21913	2.9835				26	2.03157	1.24361	1.23502	1.16278	1.91016	1.40561	1.52551	1.43599						26	58.716	63.1275	46.6046	40.2348	42.6374	41.3415	36.5831	23.7746				26	44.1274	8	12.3996	4.38393						26

	Respuesta MDL 100907 10nM expresada en gramos de tensión												Respuesta MDL 100907 10nM menos la respuesta basal														Respuesta MDL 100907 10nM expresada como porcentaje a 100% KCl																						% contracción
	Respuestas	Cobayo 1	Cobayo 2	Cobayo 3	cobayo 4	Cobayo 5	Cobayo 6	Cobayo 7	Cobayo 8				Respuestas	Cobayo 1	Cobayo 2	Cobayo 3	cobayo 4	Cobayo 5	Cobayo 6	Cobayo 7	Cobayo 8						Respuestas	Cobayo 1	Cobayo 2	Cobayo 3	cobayo 4	Cobayo 5	Cobayo 6	Cobayo 7	Cobayo 8														% de inhibición
	Basal KCl 80 mM	1.43	1.45	1.53	1.44	1.51	1.54	1.48	1.52				Basal KCl 80 mM	1.43	1.45	1.53	1.44	1.51	1.54	1.48	1.52						Basal KCl 80 mM	1.43	1.45	1.53	1.44	1.51	1.54	1.48	1.52
	Máx KCl 80 mM	3.1	4.4	6	4.1	4	4.4	3.9	4.5				Máx KCl 80 mM	3.1	4.4	6	4.1	4	4.4	3.9	4.5						Máx KCl 80 mM	3.1	4.4	6	4.1	4	4.4	3.9	4.5
	Diferencia	1.67	2.95	4.47	2.66	2.49	2.86	2.42	2.98				Diferencia	1.67	2.95	4.47	2.66	2.49	2.86	2.42	2.98						Diferencia	1.67	2.95	4.47	2.66	2.49	2.86	2.42	2.98				Promedio de las respuestas a MDL 100907 10nM expresada como porcentaje a 100% KCl
	Basal MDL 100907	1.50074	1.55334	1.50575	1.50552	1.52971	1.5118	1.57066	1.43354				Basal MDL 100907	1.50074	1.55334	1.50575	1.50552	1.52971	1.5118	1.57066	1.43354						Basal MDL 100907	1.50074	1.55334	1.50575	1.50552	1.52971	1.5118	1.57066	1.43354
	Máx MDL 100907	1.70608	1.86836	1.91668	1.80561	1.80681	1.84684	1.80416	1.76117				Máx MDL 100907	1.70608	1.86836	1.91668	1.80561	1.80681	1.84684	1.80416	1.76117						Máx MDL 100907	1.70608	1.86836	1.91668	1.80561	1.80681	1.84684	1.80416	1.76117
	Diferencia	0.205343	0.31502	0.410933	0.300089	0.277099	0.335043	0.233508	0.327637				Diferencia	0.205343	0.31502	0.410933	0.300089	0.277099	0.335043	0.233508	0.327637						Diferencia	0.205343	0.31502	0.410933	0.300089	0.277099	0.335043	0.233508	0.327637					PROMEDIO	n	DE	EE
T (min)	0	1.50074	1.55334	1.50575	1.50552	1.52971	1.5118	1.57066	1.43354			T (min)	0	0	0	0	0	0	0	0	0					T (min)	0	0	0	0	0	0	0	0	0				0	0	8	0	0						0
	2	1.58734	1.59272	1.52575	1.54019	1.5417	1.5398	1.59906	1.45634				2	0.0866082	0.0393775	0.02	0.0346622	0.0119952	0.0279968	0.0284046	0.0228064						2	5.18612	1.33483	0.447427	1.30309	0.481736	0.97891	1.17374	0.765314				2	1.4589	8	1.54469	0.546131						2
	4	1.65033	1.61634	1.64531	1.62081	1.6271	1.63658	1.61445	1.54154				4	0.149596	0.063004	0.139562	0.115286	0.0973874	0.124779	0.0437967	0.108004						4	8.95784	2.13573	3.12219	4.33406	3.91114	4.3629	1.80978	3.62428				4	4.03224	8	2.20413	0.779278						4
	6	1.70545	1.6951	1.85466	1.74049	1.7415	1.78263	1.74886	1.67519				6	0.20471	0.141759	0.348905	0.234965	0.211792	0.270829	0.178201	0.24165						6	12.2581	4.80539	7.80549	8.83325	8.50568	9.46956	7.36367	8.10906				6	8.39378	8	2.09287	0.739941						6
	8	1.73694	1.77385	1.93994	1.80678	1.80668	1.85451	1.81404	1.74867				8	0.236204	0.220514	0.434193	0.301261	0.27697	0.342711	0.24338	0.31513						8	14.144	7.47505	9.71349	11.3256	11.1233	11.9829	10.057	10.5748				8	10.7995	8	1.91984	0.678768						8
	10	1.73694	1.82898	1.98646	1.84137	1.84056	1.89261	1.83792	1.79031				10	0.236204	0.275643	0.480714	0.335846	0.310854	0.380807	0.267263	0.356773						10	14.144	9.34382	10.7542	12.6258	12.4841	13.3149	11.0439	11.9722				10	11.9604	8	1.53349	0.54217						10
	12	1.73631	1.86836	1.98422	1.86903	1.8694	1.91441	1.86675	1.8154				12	0.235572	0.31502	0.478467	0.363508	0.339686	0.402613	0.296096	0.381859						12	14.1061	10.6786	10.704	13.6657	13.642	14.0774	12.2354	12.8141				12	12.7404	8	1.41321	0.499644						12
	14	1.74056	1.86261	1.9732	1.86763	1.84856	1.89018	1.84591	1.81275				14	0.239825	0.309269	0.467454	0.362105	0.318849	0.378384	0.275258	0.379212						14	14.3608	10.4837	10.4576	13.613	12.8052	13.2302	11.3743	12.7252				14	12.3812	8	1.45256	0.513557						14
	16	1.72332	1.88411	1.97096	1.84555	1.8459	1.89099	1.84325	1.80981				16	0.222584	0.330771	0.465207	0.340022	0.316187	0.379194	0.272597	0.376276						16	13.3284	11.2126	10.4073	12.7828	12.6983	13.2585	11.2643	12.6267				16	12.1974	8	1.08416	0.383309						16
	18	1.72119	1.86048	1.9632	1.83771	1.83806	1.88319	1.83542	1.78884				18	0.220457	0.307145	0.457454	0.332191	0.308352	0.371386	0.264761	0.355305						18	13.201	10.4117	10.2339	12.4884	12.3836	12.9855	10.9405	11.923				18	11.821	8	1.15346	0.40781						18
	20	1.71757	1.86836	1.9477	1.82701	1.82764	1.87107	1.825	1.78067				20	0.216837	0.31502	0.441947	0.321491	0.297935	0.359272	0.254344	0.347133						20	12.9842	10.6786	9.88695	12.0861	11.9652	12.562	10.5101	11.6488			0.266041	20	11.5402	8	1.07944	0.38164						20
	22	1.7082	1.86623	1.9632	1.82284	1.82232	1.87269	1.81967	1.78377				22	0.207469	0.312896	0.457454	0.31732	0.292606	0.360889	0.249016	0.350233						22	12.4233	10.6066	10.2339	11.9293	11.7513	12.6185	10.2899	11.7528			0.261571	22	11.4507	8	0.945741	0.33437						22
	24	1.70608	1.86836	1.91668	1.80561	1.80681	1.84684	1.80416	1.76117				24	0.205343	0.31502	0.410933	0.300089	0.277099	0.335043	0.233508	0.327637						24	12.296	10.6786	9.19313	11.2816	11.1285	11.7148	9.64909	10.9945			0.24494	24	10.867	8	1.02385	0.361985						24
	26	1.7082	1.85261	1.92444	1.80105	1.80152	1.8459	1.79887	1.75741				26	0.207469	0.299269	0.418686	0.295524	0.271808	0.334101	0.228218	0.323878						26	12.4233	10.1447	9.36658	11.1099	10.916	11.6819	9.43048	10.8684			0.243446	26	10.7427	8	1.05967	0.374651						26

	Respuesta RS 10221 10nM expresada en gramos de tensión												Respuesta RS 10221 10nM menos la respuesta basal														Respuesta RS 10221 10nM expresada como porcentaje a 100% KCl																						% respuesta con respecto a 5-HT 10-4M
	Respuestas	Cobayo 1	Cobayo 2	Cobayo 3	cobayo 4	Cobayo 5	Cobayo 6	Cobayo 7	Cobayo 8				Respuestas	Cobayo 1	Cobayo 2	Cobayo 3	cobayo 4	Cobayo 5	Cobayo 6	Cobayo 7	Cobayo 8						Respuestas	Cobayo 1	Cobayo 2	Cobayo 3	cobayo 4	Cobayo 5	Cobayo 6	Cobayo 7	Cobayo 8														% INHIBICIÓN
	Basal KCl 80 mM	1.55	1.48	1.45	1.48	1.51	1.5	1.55	1.48				Basal KCl 80 mM	1.55	1.48	1.45	1.48	1.51	1.5	1.55	1.48						Basal KCl 80 mM	1.55	1.48	1.45	1.48	1.51	1.5	1.55	1.48
	Máx KCl 80 mM	3.5	4.1	3.9	5.7	5	3.6	3.8	4.4				Máx KCl 80 mM	3.5	4.1	3.9	5.7	5	3.6	3.8	4.4						Máx KCl 80 mM	3.5	4.1	3.9	5.7	5	3.6	3.8	4.4
	Diferencia	1.95	2.62	2.45	4.22	3.49	2.1	2.25	2.92				Diferencia	1.95	2.62	2.45	4.22	3.49	2.1	2.25	2.92						Diferencia	1.95	2.62	2.45	4.22	3.49	2.1	2.25	2.92				Promedio de las respuestas a RS 10221 10nM expresada como porcentaje a 100% KCl
	Basal RS 10221	1.56155	1.58707	1.5834	1.57246	1.55881	1.48029	1.48218	1.56124				Basal RS 10221	1.56155	1.58707	1.5834	1.57246	1.55881	1.48029	1.48218	1.56124						Basal RS 10221	1.56155	1.58707	1.5834	1.57246	1.55881	1.48029	1.48218	1.56124
	Máx RS 10221	2.3926	2.36233	2.35268	2.40251	2.45262	2.31118	2.27371	2.37245				Máx RS 10221	2.3926	2.36233	2.35268	2.40251	2.45262	2.31118	2.27371	2.37245						Máx RS 10221	2.3926	2.36233	2.35268	2.40251	2.45262	2.31118	2.27371	2.37245
	Diferencia	0.831048	0.775257	0.76928	0.83005	0.893813	0.83089	0.791529	0.811209				Diferencia	0.831048	0.775257	0.76928	0.83005	0.893813	0.83089	0.791529	0.811209						Diferencia	0.831048	0.775257	0.76928	0.83005	0.893813	0.83089	0.791529	0.811209					PROMEDIO	n	DE	EE
T (min)	0	1.56155	1.58707	1.5834	1.57246	1.55881	1.48029	1.48218	1.56124			T (min)	0	0	0	0	0	0	0	0	0					T (min)	0	0	0	0	0	0	0	0	0				0	0	8	0	0						0
	2	1.59132	1.58707	1.60876	1.58873	1.60647	1.5041	1.49606	1.58009				2	0.0297639	0	0.0253609	0.0162686	0.0476623	0.0238111	0.0138765	0.0188438						2	1.52636	0	1.03514	0.385512	1.36568	1.13386	0.616733	0.645336				2	0.838577	8	0.5171	0.182822						2
	4	1.85344	1.71024	1.93845	1.77875	1.87311	1.73843	1.71036	1.8044				4	0.291882	0.123172	0.355052	0.206298	0.314297	0.25814	0.228174	0.243157						4	14.9683	4.70121	14.4919	4.88858	9.00565	12.2924	10.1411	8.3273				4	9.85205	8	3.92705	1.38842						4
	6	2.14052	2.01455	2.12443	2.09067	2.23648	2.02896	1.97776	2.08336				6	0.578969	0.427478	0.541032	0.518212	0.677664	0.548671	0.495574	0.522122						6	29.6907	16.316	22.0829	12.2799	19.4173	26.1272	22.0255	17.8809				6	20.7276	8	5.52477	1.9533						6
	8	2.35011	2.23915	2.27659	2.32046	2.48329	2.24155	2.17995	2.29075				8	0.788558	0.652085	0.693197	0.748002	0.924475	0.761264	0.697761	0.729513						8	40.4389	24.8887	28.2938	17.7252	26.4893	36.2506	31.0116	24.9833				8	28.7602	8	7.11103	2.51413						8
	10	2.47234	2.37682	2.4034	2.4555	2.58812	2.36687	2.31312	2.42				10	0.910785	0.789747	0.820001	0.883048	1.02931	0.886577	0.830932	0.858755						10	46.7069	30.143	33.4694	20.9253	29.493	42.218	36.9303	29.4094				10	33.6619	8	8.14305	2.879						10
	12	2.49424	2.39855	2.43721	2.48184	2.59368	2.38874	2.34041	2.44458				12	0.932689	0.811484	0.853816	0.90938	1.03487	0.908448	0.858226	0.883337						12	47.8302	30.9727	34.8496	21.5493	29.6524	43.2594	38.1434	30.2513				12	34.5635	8	8.36232	2.95653						12
	14	2.46285	2.4058	2.41185	2.46277	2.54392	2.36507	2.32802	2.42655				14	0.901294	0.818729	0.828455	0.890316	0.985112	0.884781	0.845833	0.865307						14	46.2202	31.2492	33.8145	21.0975	28.2267	42.1324	37.5926	29.6338				14	33.7459	8	8.05632	2.84834						14
	16	2.45686	2.39855	2.42876	2.45297	2.51884	2.35883	2.32797	2.4234				16	0.895301	0.811484	0.845362	0.880512	0.960028	0.878537	0.845786	0.862162						16	45.9129	30.9727	34.5046	20.8652	27.508	41.8351	37.5905	29.5261				16	33.5894	8	8.0972	2.86279						16
	18	2.44571	2.39855	2.42876	2.43994	2.49843	2.34991	2.32363	2.41677				18	0.884157	0.811484	0.845362	0.867487	0.939621	0.869622	0.841444	0.855533						18	45.3414	30.9727	34.5046	20.5566	26.9232	41.4106	37.3975	29.2991				18	33.3007	8	8.04895	2.84573						18
	20	2.42351	2.38406	2.4034	2.42145	2.4757	2.32926	2.30418	2.39672				20	0.86196	0.796993	0.820001	0.848993	0.916885	0.848966	0.821996	0.835481						20	44.2031	30.4196	33.4694	20.1183	26.2718	40.427	36.5331	28.6124				20	32.5068	8	7.82435	2.76633						20
	22	2.41517	2.41304	2.37804	2.42266	2.47483	2.32838	2.30579	2.39709				22	0.853619	0.825974	0.794641	0.8502	0.916017	0.84809	0.823605	0.835848						22	43.7753	31.5257	32.4343	20.1469	26.2469	40.3853	36.6047	28.6249				22	32.468	8	7.68877	2.71839						22
	24	2.3926	2.36233	2.35268	2.40251	2.45262	2.31118	2.27371	2.37245				24	0.831048	0.775257	0.76928	0.83005	0.893813	0.83089	0.791529	0.811209						24	42.6178	29.5899	31.3992	19.6694	25.6107	39.5662	35.1791	27.7811				24	31.4267	8	7.5052	2.65349						24
	26	2.36046	2.37682	2.30196	2.37741	2.43203	2.27737	2.27327	2.35532				26	0.798907	0.789747	0.718558	0.804948	0.873214	0.797075	0.791085	0.79408						26	40.9696	30.143	29.3289	19.0746	25.0204	37.9559	35.1593	27.1945				26	30.6058	8	7.16951	2.5348						26

	Respuesta RS 127445 10nM expresada en gramos de tensión												Respuesta RS 127445 1010nM menos la respuesta basal														Respuesta RS 127445 10nM expresada como porcentaje a 100% KCl																						como % de 5-HT
	Respuestas	Cobayo 1	Cobayo 2	Cobayo 3	cobayo 4	Cobayo 5	Cobayo 6	Cobayo 7	Cobayo 8				Respuestas	Cobayo 1	Cobayo 2	Cobayo 3	cobayo 4	Cobayo 5	Cobayo 6	Cobayo 7	Cobayo 8						Respuestas	Cobayo 1	Cobayo 2	Cobayo 3	cobayo 4	Cobayo 5	Cobayo 6	Cobayo 7	Cobayo 8														% INHIBICIÓN
	Basal KCl 80 mM	1.51	1.46	1.42	1.42	1.45	1.5	1.51	1.53				Basal KCl 80 mM	1.51	1.46	1.42	1.42	1.45	1.5	1.51	1.53						Basal KCl 80 mM	1.51	1.46	1.42	1.42	1.45	1.5	1.51	1.53
	Máx KCl 80 mM	4.3	4.29	5.8	3.6	4.24	5.55	5.7	4.8				Máx KCl 80 mM	4.3	4.29	5.8	3.6	4.24	5.55	5.7	4.8						Máx KCl 80 mM	4.3	4.29	5.8	3.6	4.24	5.55	5.7	4.8
	Diferencia	2.79	2.83	4.38	2.18	2.79	4.05	4.19	3.27				Diferencia	2.79	2.83	4.38	2.18	2.79	4.05	4.19	3.27						Diferencia	2.79	2.83	4.38	2.18	2.79	4.05	4.19	3.27				Promedio de las respuestas a RS 127445 10nM expresada como porcentaje a 100% KCl
	Basal RS 127445	1.54681	1.53636	1.54912	1.5441	1.53767	1.53125	1.48042	1.5552				Basal RS 127445	1.54681	1.53636	1.54912	1.5441	1.53767	1.53125	1.48042	1.5552						Basal RS 127445	1.54681	1.53636	1.54912	1.5441	1.53767	1.53125	1.48042	1.5552
	Máx RS 127445	2.75752	2.86901	3.42328	2.54174	2.78085	2.92099	2.59874	2.71923				Máx RS 127445	2.75752	2.86901	3.42328	2.54174	2.78085	2.92099	2.59874	2.71923						Máx RS 127445	2.75752	2.86901	3.42328	2.54174	2.78085	2.92099	2.59874	2.71923
	Diferencia	1.21071	1.33265	1.87417	0.997641	1.24318	1.38973	1.11832	1.16403				Diferencia	1.21071	1.33265	1.87417	0.997641	1.24318	1.38973	1.11832	1.16403						Diferencia	1.21071	1.33265	1.87417	0.997641	1.24318	1.38973	1.11832	1.16403					PROMEDIO	n	DE	EE
T (min)	0	1.54681	1.53636	1.54912	1.5441	1.53767	1.53125	1.48042	1.5552			T (min)	0	0	0	0	0	0	0	0	0					T (min)	0	0	0	0	0	0	0	0	0				0	0	8	0	0						0
	2	1.83273	1.89252	2.09558	1.8041	1.89832	1.88309	1.91119	1.93617				2	0.285921	0.356157	0.546467	0.259999	0.360653	0.351842	0.430771	0.380967						2	10.2481	12.5851	12.4764	11.9266	12.9266	8.68745	10.2809	11.6504				2	11.3477	8	1.4711	0.520112						2
	4	2.10766	2.52056	2.88096	1.88986	2.41972	2.01292	2.29709	2.48068				4	0.560849	0.984199	1.33185	0.345758	0.882056	0.481671	0.816671	0.925481						4	20.1021	34.7773	30.4075	15.8605	31.6149	11.8931	19.491	28.3022				4	24.0561	8	8.29828	2.93389						4
	6	2.30448	2.62613	3.40139	2.30368	2.5117	2.56345	2.4176	2.53116				6	0.757667	1.08977	1.85227	0.759585	0.974029	1.0322	0.937185	0.975963						6	27.1565	38.5076	42.2893	34.8434	34.9114	25.4864	22.3672	29.8459				6	31.926	8	6.84578	2.42035						6
	8	2.59975	2.81527	3.64226	2.33829	2.7016	2.76276	2.50423	2.75213				8	1.05294	1.2789	2.09314	0.79419	1.16393	1.23151	1.02382	1.19693						8	37.7399	45.1909	47.7886	36.4307	41.7181	30.4077	24.4347	36.6033				8	37.5392	8	7.61383	2.6919						8
	10	2.64035	2.91526	3.73715	2.44444	2.80667	2.85376	2.56724	2.78761				10	1.09354	1.3789	2.18803	0.900338	1.269	1.32251	1.08682	1.23241						10	39.195	48.7243	49.955	41.2999	45.484	32.6546	25.9384	37.6885				10	40.1175	8	8.14637	2.88018						10
	12	2.68722	2.92305	3.65686	2.53289	2.81934	2.95748	2.56724	2.78761				12	1.14041	1.38668	2.10774	0.988795	1.28167	1.42622	1.08682	1.23241						12	40.8748	48.9994	48.1219	45.3576	45.9381	35.2154	25.9384	37.6885				12	41.0168	8	7.83197	2.76902						12
	14	2.64035	2.89599	3.56197	2.54174	2.78981	2.96901	2.57511	2.71068				14	1.09354	1.35963	2.01285	0.997641	1.25214	1.43776	1.0947	1.15548						14	39.195	48.0433	45.9555	45.7633	44.8796	35.5003	26.1264	35.3357				14	40.0999	8	7.48559	2.64655						14
	16	2.65597	2.8816	3.48898	2.54174	2.77917	2.93669	2.57511	2.71068				16	1.10916	1.34524	1.93986	0.997641	1.2415	1.40544	1.0947	1.15548						16	39.7549	47.5349	44.2891	45.7633	44.4984	34.7023	26.1264	35.3357				16	39.7506	8	7.27505	2.57212						16
	18	2.70284	2.87239	3.44518	2.55059	2.77697	2.92745	2.57511	2.71068				18	1.15603	1.33603	1.89607	1.00649	1.23931	1.39619	1.0947	1.15548						18	41.4347	47.2096	43.2892	46.1691	44.4196	34.4739	26.1264	35.3357				18	39.8073	8	7.23996	2.55971						18
	20	2.69503	2.87038	3.42328	2.55943	2.77424	2.92226	2.59086	2.69358				20	1.14822	1.33402	1.87417	1.01533	1.23657	1.391	1.11045	1.13838						20	41.1547	47.1384	42.7892	46.5749	44.3215	34.3457	26.5023	34.8129				20	39.705	8	7.19467	2.5437						20
	22	2.75752	2.86901	3.42328	2.54174	2.78085	2.92099	2.59874	2.71923				22	1.21071	1.33265	1.87417	0.997641	1.24318	1.38973	1.11832	1.16403						22	43.3944	47.09	42.7892	45.7633	44.5584	34.3144	26.6903	35.5971				22	40.0247	8	7.09548	2.50863						22
	24	2.70284	2.88868	3.46708	2.55059	2.79123	2.92933	2.63024	2.73632				24	1.15603	1.35232	1.91796	1.00649	1.25356	1.39808	1.14982	1.18112						24	41.4347	47.7852	43.7891	46.1691	44.9305	34.5204	27.4421	36.12				24	40.2739	8	6.98544	2.46973						24
	26	2.66378	2.87978	3.51087	2.55289	2.77856	2.94101	2.69086	2.71068				26	1.11697	1.34342	1.96176	1.00879	1.24089	1.40976	1.21045	1.15548						26	40.0349	47.4707	44.789	46.275	44.4763	34.8088	28.8889	35.3357				26	40.2599	8	6.65239	2.35197						26

																																																	como % de 5-HT
																																																	% DE INHIBICION
[truncated: 22 more columns]

## Sheet: Antagonistas S
Registros de contracción de aorta cobayos control frente a
	VALORES ABSOLUTOS												VALORES EN FUNCIÓN DE LA BASAL														VALORES EN FUNCIÓN DE K+ 80 mM
	Respuesta 5-HT 10-4 expresada en gramos de tensión												Respuesta 5-HT 10-4 menos la respuesta basal														Respuesta 5-HT 10-4 expresada como porcentaje a 100% KCl
	Respuestas	Cobayo 1 200716	Cobayo 2 20716	Cobayo 3 210716	cobayo 4 210716	Cobayo 5	Cobayo 6	Cobayo 7	Cobayo 8				Respuestas	Cobayo 1	Cobayo 2	Cobayo 3	cobayo 4	Cobayo 5	Cobayo 6	Cobayo 7	Cobayo 8						Respuestas	Cobayo 1	Cobayo 2	Cobayo 3	cobayo 4	Cobayo 5	Cobayo 6	Cobayo 7	Cobayo 8
	Basal KCl 80 mM	1.51	1.46	1.51	1.51	1.48	1.5	1.45	1.45				Basal KCl 80 mM	1.51	1.46	1.51	1.51	1.48	1.5	1.45	1.45						Basal KCl 80 mM	1.51	1.46	1.51	1.51	1.48	1.5	1.45	1.45
	Máx KCl 80 mM	4.7	4.3	5.23	4.17	4.46	4.96	5.1	4				Máx KCl 80 mM	4.7	4.3	5.23	4.17	4.46	4.96	5.1	4						Máx KCl 80 mM	4.7	4.3	5.23	4.17	4.46	4.96	5.1	4
	Diferencia	3.19	2.84	3.72	2.66	2.98	3.46	3.65	2.55				Diferencia	3.19	2.84	3.72	2.66	2.98	3.46	3.65	2.55						Diferencia	3.19	2.84	3.72	2.66	2.98	3.46	3.65	2.55				Promedio de las respuestas a 5-HT 10-4 expresada como porcentaje a 100% KCl
	Basal 5-HT	1.53999	1.55117	1.58655	1.57745	1.55291	1.50108	1.52789	1.56702				Basal 5-HT	1.53999	1.55117	1.58655	1.57745	1.55291	1.50108	1.52789	1.56702						Basal 5-HT	1.53999	1.55117	1.58655	1.57745	1.55291	1.50108	1.52789	1.56702
	Máx 5-HT	3.19	3.48	3.91	3.17	3	3.53	3.49	3.45				Máx 5-HT	3.19	3.48	3.91	3.17	3	3.53	3.49	3.45						Máx 5-HT	3.19	3.48	3.91	3.17	3	3.53	3.49	3.45
	Diferencia	1.65001	1.92883	2.32345	1.59255	1.44709	2.02892	1.96211	1.88298				Diferencia	1.65001	1.92883	2.32345	1.59255	1.44709	2.02892	1.96211	1.88298						Diferencia	1.65001	1.92883	2.32345	1.59255	1.44709	2.02892	1.96211	1.88298					PROMEDIO	n	DE	EE
T (min)	0	1.53999	1.55117	1.58655	1.57745	1.55291	1.50108	1.52789	1.56702			T (min)	0	0	0	0	0	0	0	0	0					T (min)	0	0	0	0	0	0	0	0	0				0	0	8	0	0						0
	2	2.29565	2.08772	2.76966	1.75239	2.04227	2.57403	2.07095	2.16301				2	0.75566	0.536546	1.1831	0.174945	0.489357	1.07295	0.543055	0.595988						2	23.6884	18.8925	31.8039	6.57687	16.4214	31.0102	14.8782	23.3721				2	20.8304	8	8.45543	2.98944						2
	4	3.01503	2.81677	3.51069	2.19462	2.49315	3.19845	2.70682	2.75381				4	1.47504	1.26561	1.92414	0.617169	0.940234	1.69738	1.17893	1.18679						4	46.2395	44.5636	51.7242	23.2019	31.5515	49.0571	32.2995	46.5407				4	40.6472	8	10.2227	3.61428						4
	6	3.11553	3.10309	3.68543	2.53248	2.71971	3.42711	3.05756	3.01018				6	1.57554	1.55192	2.09887	0.955034	1.1668	1.92604	1.52966	1.44316						6	49.3901	54.645	56.4214	35.9035	39.1542	55.6658	41.9086	56.5943				6	48.7104	8	8.5128	3.00973						6
	8	3.09217	3.18507	3.57993	2.684	2.77571	3.52385	3.18358	3.05618				8	1.55218	1.6339	1.99338	1.10656	1.22279	2.02278	1.65569	1.48916						8	48.6577	57.5317	53.5854	41.5998	41.0333	58.4618	45.3613	58.3983				8	50.5786	8	7.40001	2.6163						8
	10	3.03734	3.22554	3.53612	2.79903	2.82449	3.49747	3.20989	3.0963				10	1.49735	1.67437	1.94957	1.22158	1.27158	1.99639	1.682	1.52928						10	46.9388	58.9566	52.4078	45.9241	42.6705	57.6993	46.0823	59.9716				10	51.3314	8	6.82017	2.4113						10
	12	3.01714	3.2316	3.49122	2.79505	2.8242	3.47988	3.18155	3.08552				12	1.47715	1.68043	1.90467	1.21761	1.27129	1.97881	1.65366	1.5185						12	46.3057	59.1702	51.2009	45.7747	42.6607	57.1909	45.3058	59.549				12	50.8947	8	6.86007	2.4254						12
	14	3.01151	3.23641	3.54647	2.79965	2.82735	3.4447	3.17366	3.10247				14	1.47152	1.68524	1.95991	1.22221	1.27444	1.94363	1.64577	1.53545						14	46.1291	59.3395	52.6859	45.9477	42.7663	56.1742	45.0895	60.2138				14	51.0432	8	6.92841	2.44956						14
	16	3.03006	3.2841	3.55427	2.8007	2.82999	3.43591	3.23601	3.12976				16	1.49007	1.73293	1.96771	1.22325	1.27708	1.93483	1.70812	1.56274						16	46.7106	61.0185	52.8955	45.987	42.855	55.92	46.7978	61.284				16	51.6836	8	7.14866	2.52743						16
	18	3.05331	3.30355	3.70003	2.81963	2.85308	3.4535	3.29634	3.16907				18	1.51332	1.75238	2.11348	1.24218	1.30017	1.95242	1.76845	1.60205						18	47.4394	61.7034	56.8139	46.6986	43.6297	56.4284	48.4506	62.8255				18	52.9987	8	7.34571	2.5971						18
	20	3.10133	3.34705	3.74566	2.85623	2.87465	3.48868	3.34573	3.2059				20	1.56134	1.79588	2.15911	1.27878	1.32173	1.9876	1.81784	1.63887						20	48.9447	63.2351	58.0405	48.0745	44.3535	57.4451	49.8039	64.2696				20	54.2709	8	7.46122	2.63794						20
	22	3.13362	3.40561	3.76464	2.90318	2.88208	3.49747	3.39665	3.23888				22	1.59363	1.85444	2.17809	1.32573	1.32917	1.99639	1.86876	1.67186						22	49.9569	65.2971	58.5508	49.8396	44.603	57.6993	51.1988	65.563				22	55.3386	8	7.66433	2.70975						22
	24	3.15346	3.4512	3.82159	2.98317	2.91651	3.54144	3.4257	3.29312				24	1.61347	1.90003	2.23504	1.40573	1.3636	2.04037	1.89781	1.7261						24	50.5789	66.9024	60.0816	52.8469	45.7584	58.9702	51.9948	67.6901				24	56.8529	8	7.88712	2.78852						24
	26	3.11589	3.41021	3.85152	3.03786	2.93239	3.53265	3.46457	3.30799				26	1.5759	1.85904	2.26497	1.46042	1.37947	2.03157	1.93668	1.74097						26	49.4011	65.4591	60.8863	54.9029	46.291	58.716	53.0597	68.2735				26	57.1237	8	7.64312	2.70225						26

	Respuesta MDL 100907 10nM expresada en gramos de tensión												Respuesta MDL 100907 10nM menos la respuesta basal														Respuesta MDL 100907 10nM expresada como porcentaje a 100% KCl
	Respuestas	Cobayo 1	Cobayo 2	Cobayo 3	cobayo 4	Cobayo 5	Cobayo 6	Cobayo 7	Cobayo 8				Respuestas	Cobayo 1	Cobayo 2	Cobayo 3	cobayo 4	Cobayo 5	Cobayo 6	Cobayo 7	Cobayo 8						Respuestas	Cobayo 1	Cobayo 2	Cobayo 3	cobayo 4	Cobayo 5	Cobayo 6	Cobayo 7	Cobayo 8
	Basal KCl 80 mM	1.4	1.5	1.44	1.45	1.48	1.48	1.43	1.52				Basal KCl 80 mM	1.4	1.5	1.44	1.45	1.48	1.48	1.43	1.52						Basal KCl 80 mM	1.4	1.5	1.44	1.45	1.48	1.48	1.43	1.52
	Máx KCl 80 mM	3.8	4.2	5.1	7	5.89	4.33	7.5	4.9				Máx KCl 80 mM	3.8	4.2	5.1	7	5.89	4.33	7.5	4.9						Máx KCl 80 mM	3.8	4.2	5.1	7	5.89	4.33	7.5	4.9
	Diferencia	2.4	2.7	3.66	5.55	4.41	2.85	6.07	3.38				Diferencia	2.4	2.7	3.66	5.55	4.41	2.85	6.07	3.38						Diferencia	2.4	2.7	3.66	5.55	4.41	2.85	6.07	3.38				Promedio de las respuestas a MDL 100907 10nM expresada como porcentaje a 100% KCl
	Basal MDL 100907	1.50395	1.57477	1.50006	1.55074	1.47626	1.52718	1.55802	1.51952				Basal MDL 100907	1.50395	1.57477	1.50006	1.55074	1.47626	1.52718	1.55802	1.51952						Basal MDL 100907	1.50395	1.57477	1.50006	1.55074	1.47626	1.52718	1.55802	1.51952
	Máx MDL 100907	1.76377	1.87404	1.92447	1.85409	2.36496	1.98464	2.68693	2.18476				Máx MDL 100907	1.76377	1.87404	1.92447	1.85409	2.36496	1.98464	2.68693	2.18476						Máx MDL 100907	1.76377	1.87404	1.92447	1.85409	2.36496	1.98464	2.68693	2.18476									T
	Diferencia	0.259825	0.299269	0.424406	0.303352	0.888707	0.457454	1.12892	0.665238				Diferencia	0.259825	0.299269	0.424406	0.303352	0.888707	0.457454	1.12892	0.665238						Diferencia	0.259825	0.299269	0.424406	0.303352	0.888707	0.457454	1.12892	0.665238					PROMEDIO	n	DE	EE	MDL CC vs CS
T (min)	0	1.50395	1.57477	1.50006	1.55074	1.47626	1.52718	1.55802	1.51952			T (min)	0	0	0	0	0	0	0	0	0					T (min)	0	0	0	0	0	0	0	0	0				0	0	8	0	0	#DIV/0!					0
	2	1.59056	1.61415	1.5235	1.57607	1.45245	1.52718	1.61602	1.54075				2	0.0866082	0.0393775	0.023439	0.0253269	-0.0238047	0	0.0579993	0.0212248						2	3.60867	1.45843	0.64041	0.45634	-0.539788	0	0.955507	0.627953				2	0.90094	8	1.24631	0.440638	0.219909					2
	4	1.65354	1.63778	1.59382	1.62838	1.66669	1.66675	2.1763	1.67614				4	0.149596	0.063004	0.093756	0.0776373	0.190437	0.139562	0.61828	0.15662						4	6.23317	2.33348	2.56164	1.39887	4.31831	4.89692	10.1858	4.63373				4	4.57024	8	2.76637	0.978059	0.336795					4
	6	1.70866	1.71653	1.71882	1.71467	2.09518	1.87609	2.69403	1.92688				6	0.20471	0.141759	0.218764	0.16393	0.618921	0.348905	1.13601	0.407355						6	8.52959	5.25034	5.97716	2.95369	14.0345	12.2423	18.7151	12.0519				6	9.96933	8	5.23745	1.85172	0.22132					6
	8	1.74015	1.79529	1.81258	1.78267	2.34116	1.96138	2.88551	2.10988				8	0.236204	0.220514	0.31252	0.231931	0.864903	0.434193	1.3275	0.590356						8	9.84184	8.16719	8.5388	4.17894	19.6123	15.2348	21.8698	17.4662				8	13.1137	8	6.30506	2.22918	0.168752					8
	10	1.74015	1.85042	1.87508	1.82188	2.40464	2.0079	2.8997	2.18103				10	0.236204	0.275643	0.375024	0.271142	0.928382	0.480714	1.34168	0.661506						10	9.84184	10.209	10.2466	4.88545	21.0517	16.8672	22.1035	19.5712				10	14.347	8	6.35288	2.24608	0.159576					10
	12	1.74952	1.86979	1.92978	1.8497	2.42844	2.01565	2.80041	2.21289				12	0.245572	0.29502	0.429715	0.298954	0.952187	0.488467	1.24239	0.693366						12	10.2321	10.9267	11.7408	5.38656	21.5915	17.1392	20.4677	20.5138				12	14.7498	8	5.97837	2.11367	0.185274					12
	14	1.76377	1.87404	1.92447	1.85409	2.36496	1.98464	2.68693	2.18476				14	0.259825	0.299269	0.424406	0.303352	0.888707	0.457454	1.12892	0.665238						14	10.826	11.084	11.5958	5.4658	20.1521	16.051	18.5983	19.6816				14	14.1818	8	5.24275	1.85359	0.182535					14
	16	1.71653	1.90554	1.98447	1.86885	2.33322	1.99239	2.61601	2.15536				16	0.212584	0.330771	0.484406	0.318106	0.856968	0.465207	1.05799	0.635836						16	8.85766	12.2508	13.2351	5.73163	19.4324	16.3231	17.4299	18.8117				16	14.009	8	4.90303	1.73348	0.162412					16
	18	1.72441	1.88192	2.00009	1.86881	2.29355	1.98464	2.57346	2.13593				18	0.220457	0.307145	0.500032	0.318063	0.817293	0.457454	1.01544	0.616405						18	9.18572	11.3757	13.6621	5.73087	18.5327	16.051	16.7289	18.2368				18	13.688	8	4.59701	1.62529	0.141979					18
	20	1.70079	1.88979	2.00791	1.86616	2.23007	1.96913	2.538	2.11618				20	0.196837	0.31502	0.507845	0.315419	0.753814	0.441947	0.97998	0.596656						20	8.20153	11.6674	13.8755	5.68323	17.0933	15.5069	16.1447	17.6526			0.243743	20	13.2281	8	4.36318	1.54262	0.153073					20
	22	1.66142	1.89767	2.03916	1.86608	2.20627	1.98464	2.53091	2.10864				22	0.157469	0.322896	0.539097	0.315339	0.73001	0.457454	0.972888	0.589118						22	6.56123	11.9591	14.7294	5.68179	16.5535	16.051	16.0278	17.4295			0.237162	22	13.1242	8	4.62431	1.63494	0.166484					22
	24	1.66929	1.88979	2.03916	1.86608	2.15866	1.93812	2.48835	2.10044				24	0.165343	0.31502	0.539097	0.315339	0.6824	0.410933	0.930335	0.580921						24	6.88929	11.6674	14.7294	5.68178	15.4739	14.4187	15.3268	17.187			0.222887	24	12.6718	8	4.24062	1.49929	0.130742					24
	26	1.66142	1.87404	2.03916	1.85821	2.10311	1.94587	2.48453	2.08291				26	0.157469	0.299269	0.539097	0.307464	0.626856	0.418686	0.926511	0.563387						26	6.56123	11.084	14.7294	5.53989	14.2144	14.6907	15.2638	16.6683			0.216092	26	12.344	8	4.19599	1.48351	0.156519					26

	Respuesta RS 10221 10nM expresada en gramos de tensión												Respuesta RS 10221 10nM menos la respuesta basal														Respuesta RS 10221 10nM expresada como porcentaje a 100% KCl																						como % de 5-HT
	Respuestas	Cobayo 1	Cobayo 2	Cobayo 3	cobayo 4	Cobayo 5	Cobayo 6	Cobayo 7	Cobayo 8				Respuestas	Cobayo 1	Cobayo 2	Cobayo 3	cobayo 4	Cobayo 5	Cobayo 6	Cobayo 7	Cobayo 8						Respuestas	Cobayo 1	Cobayo 2	Cobayo 3	cobayo 4	Cobayo 5	Cobayo 6	Cobayo 7	Cobayo 8
	Basal KCl 80 mM	1.47	1.4	1.51	1.49	1.52	1.45	1.45	1.45				Basal KCl 80 mM	1.47	1.4	1.51	1.49	1.52	1.45	1.45	1.45						Basal KCl 80 mM	1.47	1.4	1.51	1.49	1.52	1.45	1.45	1.45
	Máx KCl 80 mM	5	4.8	5.2	3.8	5.26	6.9	5	5.38				Máx KCl 80 mM	5	4.8	5.2	3.8	5.26	6.9	5	5.38						Máx KCl 80 mM	5	4.8	5.2	3.8	5.26	6.9	5	5.38
	Diferencia	3.53	3.4	3.69	2.31	3.74	5.45	3.55	3.93				Diferencia	3.53	3.4	3.69	2.31	3.74	5.45	3.55	3.93						Diferencia	3.53	3.4	3.69	2.31	3.74	5.45	3.55	3.93				Promedio de las respuestas a RS 10221 10nM expresada como porcentaje a 100% KCl
	Basal RS 10221	1.56622	1.57448	1.51865	1.5469	1.58707	1.5834	1.51788	1.47163				Basal RS 10221	1.56622	1.57448	1.51865	1.5469	1.58707	1.5834	1.51788	1.53668						Basal RS 10221	1.56622	1.57448	1.51865	1.5469	1.58707	1.5834	1.51788	1.53668
	Máx RS 10221	2.87517	2.37133	3.14265	2.53159	2.39855	2.42876	2.71645	2.47994				Máx RS 10221	2.87517	2.37133	3.14265	2.53159	2.39855	2.42876	2.71645	2.47994						Máx RS 10221	2.87517	2.37133	3.14265	2.53159	2.39855	2.42876	2.71645	2.47994									T
	Diferencia	1.30895	0.796848	1.624	0.98469	0.811484	0.845362	1.19858	1.00831				Diferencia	1.30895	0.796848	1.624	0.98469	0.811484	0.845362	1.19858	0.943256						Diferencia	1.30895	0.796848	1.624	0.98469	0.811484	0.845362	1.19858	0.943256					PROMEDIO	n	DE	EE	RS10 CC vs CS
T (min)	0	1.56622	1.57448	1.51865	1.5469	1.58707	1.5834	1.51788	1.47163			T (min)	0	0	0	0	0	0	0	0	0					T (min)	0	0	0	0	0	0	0	0	0				0	0	8	0	0	#DIV/0!					0
	2	1.77212	1.60839	1.60136	1.57035	1.58707	1.60876	1.65972	1.53668				2	0.205902	0.0339084	0.0827035	0.023445	0	0.0253609	0.141843	0.0650521						2	5.83291	0.997306	2.24129	1.01494	0	0.465337	3.99558	1.65527				2	2.02533	8	1.97037	0.69663	0.0608268					2
	4	2.26481	1.65078	1.65399	1.68757	1.71024	1.93845	2.15617	2.00831				4	0.698595	0.0762939	0.135333	0.14067	0.123172	0.355052	0.638295	0.53668						4	19.7902	2.24394	3.66756	6.08961	3.29336	6.51472	17.9801	13.656				4	9.15444	8	6.9678	2.46349	0.404361					4
	6	2.65456	1.85423	1.7818	2.13303	2.01455	2.12443	2.6739	2.39049				6	1.08834	0.279744	0.263147	0.586125	0.427478	0.541032	1.15602	0.918861						6	30.8311	8.22778	7.13137	25.3734	11.4299	9.92719	32.564	23.3807				6	18.6082	8	10.5497	3.72987	0.311266					6
	8	2.8531	2.15093	1.9848	2.44563	2.23915	2.27659	2.97177	2.56939				8	1.28689	0.576443	0.466147	0.898725	0.652085	0.693197	1.45389	1.09775						8	36.4557	16.9542	12.6327	38.9058	17.4354	12.7192	40.9547	27.9327				8	25.4988	8	12.0208	4.24999	0.259836					8
	10	2.91193	2.31199	2.28554	2.5863	2.37682	2.4034	2.98595	2.61818				10	1.34571	0.737508	0.766887	1.0394	0.789747	0.820001	1.46808	1.14654						10	38.1222	21.6914	20.7828	44.9955	21.1162	15.0459	41.3543	29.1741				10	29.0353	8	11.1453	3.94047	0.179592					10
	12	2.91929	2.44762	2.70658	2.60974	2.39855	2.43721	2.92922	2.58565				12	1.35307	0.873142	1.18792	1.06284	0.811484	0.853816	1.41134	1.11402						12	38.3306	25.6806	32.193	46.0104	21.6974	15.6663	39.7561	28.3465				12	30.9601	8	10.1004	3.57102	0.224972					12
	14	2.91929	2.42219	3.00732	2.57067	2.4058	2.41185	2.78737	2.52873				14	1.35307	0.847711	1.48866	1.02377	0.818729	0.828455	1.2695	1.0571						14	38.3306	24.9327	40.3432	44.3188	21.8911	15.201	35.7605	26.8981				14	30.9595	8	10.1931	3.60379	0.276917					14
	16	2.87517	2.37133	3.14265	2.53159	2.39855	2.42876	2.71645	2.47994				16	1.30895	0.796848	1.624	0.98469	0.811484	0.845362	1.19858	1.00831						16	37.0806	23.4367	44.0107	42.6273	21.6974	15.5112	33.7627	25.6567				16	30.4729	8	10.4133	3.68164	0.257425					16
	18	2.80163	2.32894	3.1652	2.49252	2.39855	2.42876	2.6739	2.5206				18	1.23541	0.754462	1.64655	0.945615	0.811484	0.845362	1.15602	1.04897						18	34.9975	22.1901	44.622	40.9357	21.6974	15.5112	32.564	26.6912				18	29.9011	8	10.1113	3.57487	0.234587					18
	20	2.80163	2.29504	3.12009	2.47689	2.38406	2.4034	2.63844	2.51247				20	1.23541	0.720554	1.60144	0.929985	0.796993	0.820001	1.12056	1.04083						20	34.9975	21.1928	43.3995	40.2591	21.31	15.0459	31.5651	26.4843				20	29.2818	8	9.9797	3.52836	0.24189					20
	22	2.80898	2.24417	2.9998	2.47689	2.41304	2.37804	2.63135	2.52873				22	1.24276	0.669691	1.48114	0.929985	0.825974	0.794641	1.11347	1.0571						22	35.2058	19.6968	40.1394	40.2591	22.0849	14.5806	31.3653	26.8981				22	28.7787	8	9.57135	3.38398	0.20483					22
	24	2.83104	2.19331	3.04491	2.49252	2.36233	2.35268	2.60298	2.55312				24	1.26482	0.618829	1.52625	0.945615	0.775257	0.76928	1.0851	1.08149						24	35.8307	18.2008	41.3619	40.9357	20.7288	14.1152	30.5662	27.5189				24	28.6573	8	10.3664	3.66508	0.275159					24
	26	2.81634	2.15093	3.03739	2.45344	2.37682	2.30196	2.59588	2.54499				26	1.25012	0.576443	1.51874	0.90654	0.789747	0.718558	1.07801	1.07336						26	35.4141	16.9542	41.1582	39.2442	21.1162	13.1845	30.3664	27.312				26	28.0937	8	10.3471	3.65824	0.290696					26

	Respuesta RS 127445 10nM expresada en gramos de tensión												Respuesta RS 127445 1010nM menos la respuesta basal														Respuesta RS 127445 10nM expresada como porcentaje a 100% KCl																						como % de 5-HT
	Respuestas	Cobayo 1	Cobayo 2	Cobayo 3	cobayo 4	Cobayo 5	Cobayo 6	Cobayo 7	Cobayo 8				Respuestas	Cobayo 1	Cobayo 2	Cobayo 3	cobayo 4	Cobayo 5	Cobayo 6	Cobayo 7	Cobayo 8						Respuestas	Cobayo 1	Cobayo 2	Cobayo 3	cobayo 4	Cobayo 5	Cobayo 6	Cobayo 7	Cobayo 8
	Basal KCl 80 mM	1.5	1.5	1.55	1.45	1.32	1.53	1.52	1.49				Basal KCl 80 mM	1.5	1.5	1.55	1.45	1.32	1.53	1.52	1.49						Basal KCl 80 mM	1.5	1.5	1.55	1.45	1.32	1.53	1.52	1.49
	Máx KCl 80 mM	3.9	4.75	3.2	4.86	4.45	3.4	4.2	4.8				Máx KCl 80 mM	3.9	4.75	3.2	4.86	4.45	3.4	4.2	4.8						Máx KCl 80 mM	3.9	4.75	3.2	4.86	4.45	3.4	4.2	4.8
	Diferencia	2.4	3.25	1.65	3.41	3.13	1.87	2.68	3.31				Diferencia	2.4	3.25	1.65	3.41	3.13	1.87	2.68	3.31						Diferencia	2.4	3.25	1.65	3.41	3.13	1.87	2.68	3.31				Promedio de las respuestas a RS 127445 10nM expresada como porcentaje a 100% KCl
	Basal RS 127445	1.55087	1.58177	1.50157	1.52789	1.42416	1.48346	1.56491	1.48215				Basal RS 127445	1.55087	1.58177	1.50157	1.52789	1.42416	1.48346	1.56491	1.48215						Basal RS 127445	1.55087	1.58177	1.50157	1.52789	1.42416	1.48346	1.56491	1.48215
	Máx RS 127445	2.55966	3.49239	2.44718	3.46457	3.41441	2.39747	2.70916	3.09759				Máx RS 127445	2.55966	3.49239	2.44718	3.46457	3.41441	2.39747	2.70916	3.09759						Máx RS 127445	2.55966	3.49239	2.44718	3.46457	3.41441	2.39747	2.70916	3.09759									T
	Diferencia	1.00879	1.91061	0.945609	1.93668	1.99025	0.914017	1.14425	1.61544				Diferencia	1.00879	1.91061	0.945609	1.93668	1.99025	0.914017	1.14425	1.61544						Diferencia	1.00879	1.91061	0.945609	1.93668	1.99025	0.914017	1.14425	1.61544					PROMEDIO	n	DE	EE	RS 12 CC vs CS
T (min)	0	1.55087	1.58177	1.50157	1.52789	1.42416	1.48346	1.56491	1.48215			T (min)	0	0	0	0	0	0	0	0	0					T (min)	0	0	0	0	0	0	0	0	0				0	0	8	0	0	#DIV/0!					0
	2	1.60086	1.99381	1.54232	2.07095	2.26705	1.51458	1.94901	1.84155				2	0.0499991	0.412041	0.0407479	0.543055	0.842887	0.0311222	0.384094	0.359395						2	2.0833	12.6782	2.46957	15.9254	26.9293	1.66429	14.3319	10.8579				2	10.8675	8	8.71149	3.07998	0.440004					2
	4	1.78662	2.7197	1.72895	2.70682	2.77459	1.70165	2.35313	2.57127				4	0.235758	1.13793	0.227381	1.17893	1.35043	0.218192	0.788221	1.08912						4	9.82326	35.0133	13.7806	34.5728	43.1447	11.668	29.4112	32.9039				4	26.2897	8	12.67	4.47952	0.341454					4
	6	2.14045	3.1492	2.07594	3.05756	2.98947	2.04521	2.54578	3.08319				6	0.589585	1.56743	0.574361	1.52966	1.56531	0.561749	0.980867	1.60104						6	24.5661	48.2285	34.8098	44.8582	50.0099	30.0401	36.5995	48.3697				6	39.6852	8	9.53697	3.37183	0.0413114					6
	8	2.33506	3.3459	2.26605	3.18358	3.07569	2.23308	2.64037	3.25905				8	0.78419	1.76413	0.764476	1.65569	1.65153	0.749619	1.07546	1.7769						8	32.6746	54.2809	46.3319	48.5538	52.7645	40.0866	40.129	53.6827				8	46.063	8	7.80989	2.76121	0.0221154					8
	10	2.4412	3.4185	2.37546	3.20989	3.07641	2.34411	2.70022	3.31308				10	0.890338	1.83673	0.873884	1.682	1.65225	0.860656	1.13531	1.83093						10	37.0974	56.5148	52.9626	49.3256	52.7876	46.0244	42.3622	55.3151				10	49.0487	8	6.77256	2.39446	0.0158985					10
	12	2.52966	3.46273	2.44167	3.18155	3.05833	2.39921	2.70743	3.2868				12	0.978795	1.88095	0.9401	1.65366	1.63416	0.915753	1.14252	1.80465						12	40.7831	57.8755	56.9758	48.4945	52.2097	48.9707	42.6314	54.5211				12	50.3077	8	6.29993	2.22736	0.0101973					12
	14	2.53851	3.43767	2.44516	3.17366	3.09269	2.40001	2.70059	3.20586				14	0.987641	1.8559	0.943582	1.64577	1.66853	0.916553	1.13567	1.72371						14	41.1517	57.1045	57.1868	48.2629	53.3077	49.0135	42.3759	52.0758				14	50.0599	8	6.06813	2.14541	0.00555716					14
	16	2.53851	3.43681	2.44791	3.23601	3.16842	2.38914	2.69332	3.1512				16	0.987641	1.85504	0.946337	1.70812	1.74426	0.905685	1.1284	1.66905						16	41.1517	57.0782	57.3537	50.0915	55.7271	48.4323	42.1046	50.4244				16	50.2954	8	6.31953	2.23429	0.00395513					16
	18	2.54735	3.49164	2.45105	3.29634	3.21629	2.40443	2.69716	3.08529				18	0.996486	1.90986	0.949479	1.76845	1.79213	0.920976	1.13225	1.60314						18	41.5203	58.7651	57.5442	51.8606	57.2565	49.25	42.2481	48.4332				18	50.8598	8	6.75026	2.38658	0.00348897					18
	20	2.5562	3.55771	2.45212	3.34573	3.29142	2.40161	2.70488	3.02401				20	1.00533	1.97593	0.950546	1.81784	1.86725	0.918153	1.13997	1.54186						20	41.8888	60.7979	57.6089	53.3092	59.6567	49.0991	42.5361	46.5818				20	51.4348	8	7.52348	2.65995	0.00329393					20
	22	2.55851	3.52205	2.44791	3.39665	3.34833	2.38914	2.703	3.04829				22	1.00764	1.94028	0.946337	1.86876	1.92417	0.905685	1.13809	1.56614						22	41.985	59.7008	57.3537	54.8023	61.4751	48.4323	42.466	47.3154				22	51.6913	8	7.65976	2.70813	0.00347318					22
	24	2.55735	3.49421	2.44381	3.4257	3.42804	2.39356	2.7054	3.04503				24	1.00649	1.91243	0.942234	1.89781	2.00388	0.910108	1.14049	1.56288						24	41.9369	58.8442	57.1051	55.6542	64.0216	48.6689	42.5554	47.2169				24	52.0004	8	8.06418	2.85112	0.00384845					24
	26	2.55966	3.49239	2.44718	3.46457	3.41441	2.39747	2.70916	3.09759				26	1.00879	1.91061	0.945609	1.93668	1.99025	0.914017	1.14425	1.61544						26	42.0331	58.7881	57.3097	56.7941	63.5863	48.8779	42.6957	48.8048				26	52.3612	8	7.895	2.7913	0.00255204					26

																																																	como % de 5-HT
[truncated: 17 more columns]

## Sheet: Hoja1
		inerSTAT-a v2.0				Instituto Nacional de Enfermedades		INSTRUCTIONS
			Mario H. Vargas --Jun-02---			Respiratorias (México)		To perform 1-way or 2-factors analysis of variance (ANOVA) plus multiple comparison tests, just introduce
								number of values (n), mean, and standard deviation (SD) or standard error of the mean (SEM).
				Group 1	Group 2	Group 3	Group 4	Group 5	Group 6	Group 7	Group 8
			name =	5-HT	2a	2b	2c	5_HTs	2as	2bs	2cs
		Put d for SD	n =	8	8	8	8	8	8	8	8
		or e for SEM	mean =	1022.52	364.091	20.3785	271.851	1227.48	549.69	28.7525	324.625
		d	SD =	280.633	51.7355	12.2395	85.821	177.799	166.912	7.58672	73.0354
			data ok?-->	ok	ok	ok	ok	ok	ok	ok	ok
			Bartlett's test for homogeneity of variances
			Bc=	83.7227
			p=	2.39264e-15
			Reject	that variances are homogenous
				(thus, ANOVA might be not valid ! )
									Effect	Levels	Factor name
				R E S U L T S					F
				1-way ANOVA					F
			F=	80.46	d.f.:	7
			p =	6.92295e-27		56
										R E S U L T S
			Reject	that groups have no differences						2-factors ANOVA
			(thus, at least one pair of groups
			will reach statistically significant
			difference)
				b	<---- Which test should follow 1-way ANOVA?
				a - Student's t-test (all groups comparisons)
			SELECTED-->	b - TUKEY'S TEST (ALL GROUPS COMPARISONS)
				c - Dunnett's test (Group 1 vs all groups)
		R E S U L T S
		TUKEY'S		Q values from pairwise means.
		TEST
			Names	5-HT	2a	2b	2c	5_HTs	2as	2bs	2cs
			5-HT		13.4309	20.4421	15.3125	-4.18096	9.64499	20.2713	14.236
		P	2a	p<0.01		7.01119	1.88154	-17.6119	-3.78594	6.84037	0.805027
			2b	p<0.01	p<0.01		-5.12965	-24.6231	-10.7971	-0.170817	-6.20616
		v	2c	p<0.01	n.s.	p<0.05		-19.4934	-5.66748	4.95883	-1.07652
		a	5_HTs	n.s.	p<0.01	p<0.01	p<0.01		13.826	24.4523	18.4169
		l	2as	p<0.01	n.s.	p<0.01	p<0.01	p<0.01		10.6263	4.59097
		u	2bs	p<0.01	p<0.01	n.s.	p<0.05	p<0.01	p<0.01		-6.03535
		e	2cs	p<0.01	n.s.	p<0.01	n.s.	p<0.01	p<0.05	p<0.01
		2

## Sheet: Hoja2
	CONTROLES						SENSIBILIZADOS							AGONISTAS ANIMALES CONTROLES								AGONISTAS ANIMALES SENSIBILIZADOS									ANGONISTAS ANIMALES CONTROLES								ANGONISTAS ANIMALES SENSIBILIZADOS
	Respuesta 5-HT 10-4 expresada en gramos de tensión						Respuesta 5-HT 10-4 expresada en gramos de tensión							Promedio de las respuestas a 5-HT 10-4 expresada como porcentaje a 100% KCl								Promedio de las respuestas a 5-HT 10-4 expresada como porcentaje a 100% KCl					T Student				Promedio de las respuestas a 5-HT 10-4 expresada como porcentaje a 100% KCl								Promedio de las respuestas a 5-HT 10-4 expresada como porcentaje a 100% KCl
	MINUTO	PROMEDIO	n	DE	EE			PROMEDIO	n	DE	EE				PROMEDIO	n	DE	EE					PROMEDIO	n	DE	EE	5-HT CC vs CS					PROMEDIO	n	DE	EE					PROMEDIO	n	DE	EE
	0	0	8	0	0		0	0	9	0	0			0	0	8	0	0				0	0	8	0	0	#DIV/0!				0	0	8	0	0				0	0	8	0	0
	2	23.5646	8	9.71193	3.43368		2	19.1886	9	8.56293	2.85431			2	21.8585	8	9.33919	3.3019				2	20.8304	8	8.45543	2.98944	0.411457				2	21.8585	8	9.33919	3.3019				2	20.8304	8	8.45543	2.98944
	4	38.1996	8	14.3162	5.06156		4	42.5917	9	18.3184	6.10612			4	35.7303	8	12.362	4.37064				4	40.6472	8	10.2227	3.61428	0.192273				4	35.7303	8	12.362	4.37064				4	40.6472	8	10.2227	3.61428
	6	44.3268	8	14.0384	4.96331		6	55.3372	9	24.7328	8.24428			6	41.5441	8	12.6654	4.4779				6	48.7104	8	8.5128	3.00973	0.106767				6	41.5441	8	12.6654	4.4779				6	48.7104	8	8.5128	3.00973
	8	46.2535	8	12.7464	4.50652		8	59.7308	9	26.2595	8.75316			8	43.4307	8	12.7936	4.52324				8	50.5786	8	7.40001	2.6163	0.107287				8	43.4307	8	12.7936	4.52324				8	50.5786	8	7.40001	2.6163
	10	45.809	8	11.0569	3.90919		10	60.576	9	25.5555	8.51849			10	43.0712	8	12.1728	4.30372				10	51.3314	8	6.82017	2.4113	0.0773773				10	43.0712	8	12.1728	4.30372				10	51.3314	8	6.82017	2.4113
	12	45.5145	8	9.75507	3.44894		12	60.0925	9	24.4127	8.13757			12	42.7919	8	11.9361	4.22003				12	50.8947	8	6.86007	2.4254	0.0769539				12	42.7919	8	11.9361	4.22003				12	50.8947	8	6.86007	2.4254
	14	45.6006	8	8.52407	3.01372		14	59.0758	9	22.9499	7.64996			14	42.9082	8	11.4224	4.03844				14	51.0432	8	6.92841	2.44956	0.0715491				14	42.9082	8	11.4224	4.03844				14	51.0432	8	6.92841	2.44956
	16	45.8888	8	9.5159	3.36438		16	59.3757	9	22.555	7.51834			16	43.0998	8	11.8457	4.1881				16	51.6836	8	7.14866	2.52743	0.0638496				16	43.0998	8	11.8457	4.1881				16	51.6836	8	7.14866	2.52743
	18	46.0164	8	8.95991	3.16781		18	59.7177	9	22.2355	7.41183			18	43.2413	8	11.4705	4.05544				18	52.9987	8	7.34571	2.5971	0.045001	*			18	43.2413	8	11.4705	4.05544				18	52.9987	8	7.34571	2.5971
	20	46.2268	8	9.8675	3.48869		20	60.4297	9	22.0253	7.34176			20	43.3776	8	11.7614	4.1583				20	54.2709	8	7.46122	2.63794	0.0340199	*			20	43.3776	8	11.7614	4.1583				20	54.2709	8	7.46122	2.63794
	22	46.6646	8	10.456	3.69676		22	61.3897	9	22.3248	7.44161			22	43.7766	8	11.9366	4.22022				22	55.3386	8	7.66433	2.70975	0.0300219	*			22	43.7766	8	11.9366	4.22022				22	55.3386	8	7.66433	2.70975
	24	47.3183	8	10.7843	3.81283		24	62.1361	9	22.7518	7.58393			24	44.3661	8	12.4733	4.40996				24	56.8529	8	7.88712	2.78852	0.0262177	*			24	44.3661	8	12.4733	4.40996				24	56.8529	8	7.88712	2.78852
	26	47.035	8	10.5884	3.74355		26	62.8524	9	23.1062	7.70205			26	44.1274	8	12.3996	4.38393				26	57.1237	8	7.64312	2.70225	0.0259108	*			26	44.1274	8	12.3996	4.38393				26	57.1237	8	7.64312	2.70225
	Respuesta 5-HT 10-5 expresada en gramos de tensión						Respuesta 5-HT 10-5 expresada en gramos de tensión							Promedio de las respuestas a TCB-2 10-4 expresada como porcentaje a 100% KCl								Promedio de las respuestas a TCB-2 10-4 expresada como porcentaje a 100% KCl									Promedio de las respuestas a MDL 100907 10nM expresada como porcentaje a 100% KCl								Promedio de las respuestas a MDL 100907 10nM expresada como porcentaje a 100% KCl
	MINUTO	PROMEDIO	n	DE	EE			PROMEDIO	n	DE	EE				PROMEDIO	n	DE	EE					PROMEDIO	n	DE	EE	TCB-2 CC vs CS	T				PROMEDIO	n	DE	EE					PROMEDIO	n	DE	EE	MDL CC vs CS
	0	0	4	0	0		0	0	9	0	0			0	0	8	0	0				0	0	8	0	0	#DIV/0!				0	0	8	0	0				0	0	8	0	0	#DIV/0!
	2	4.3528	4	1.74041	0.870205		2	2.4704	9	2.3348	0.778267			2	3.55646	8	1.63194	0.576979				2	4.10464	8	3.24995	1.14903	0.334114				2	1.4589	8	1.54469	0.546131				2	0.90094	8	1.24631	0.440638	0.0211191
	4	5.74765	4	2.96238	1.48119		4	6.07351	9	5.38892	1.79631			4	7.13149	8	2.29177	0.810262				4	10.9939	8	5.06147	1.7895	0.036775	*			4	4.03224	8	2.20413	0.779278				4	4.57024	8	2.76637	0.978059	0.338369
	6	6.74885	4	4.40835	2.20417		6	9.21074	9	7.56861	2.52287			6	10.9646	8	2.93609	1.03806				6	16.8848	8	5.19595	1.83705	0.0206165	*			6	8.39378	8	2.09287	0.739941				6	9.96933	8	5.23745	1.85172	0.223796
	8	7.54243	4	6.27094	3.13547		8	12.2489	9	11.623	3.87433			8	13.8548	8	3.18823	1.12721				8	20.8362	8	7.51533	2.65707	0.044728	*			8	10.7995	8	1.91984	0.678768				8	13.1137	8	6.30506	2.22918	0.174688
	10	8.88078	4	8.22225	4.11113		10	14.5612	9	14.0759	4.69196			10	15.9064	8	2.96289	1.04754				10	24.1926	8	7.879	2.78565	0.0316034	*			10	11.9604	8	1.53349	0.54217				10	14.347	8	6.35288	2.24608	0.168362
	12	9.5757	4	10.4747	5.23734		12	15.5615	9	15.9716	5.32388			12	16.9626	8	2.90036	1.02543				12	25.742	8	8.70777	3.07866	0.0326329	*			12	12.7404	8	1.41321	0.499644				12	14.7498	8	5.97837	2.11367	0.187535
	14	10.1672	4	11.8061	5.90305		14	15.9697	9	16.9386	5.64622			14	17.599	8	2.70352	0.955839				14	26.4675	8	8.74939	3.09338	0.0279264	*			14	12.3812	8	1.45256	0.513557				14	14.1818	8	5.24275	1.85359	0.195436
	16	10.88	4	11.7308	5.86538		16	16.1163	9	17.3248	5.77493			16	17.8552	8	2.41357	0.853325				16	26.7144	8	9.12864	3.22746	0.028346	*			16	12.1974	8	1.08416	0.383309				16	14.009	8	4.90303	1.73348	0.175143
	18	11.2533	4	12.5819	6.29096		18	16.036	9	17.5525	5.85084			18	17.5657	8	2.41716	0.854594				18	26.9711	8	8.53475	3.01749	0.0172895	*			18	11.821	8	1.15346	0.40781				18	13.688	8	4.59701	1.62529	0.15784
	20	12.0471	4	13.3804	6.6902		20	15.9934	9	17.2898	5.76327			20	17.5356	8	2.48102	0.877173				20	26.3761	8	9.01108	3.1859	0.0260419	*			20	11.5402	8	1.07944	0.38164				20	13.2281	8	4.36318	1.54262	0.176144
	22	12.373	4	13.0897	6.54485		22	15.9602	9	17.9226	5.97421			22	17.4888	8	2.72825	0.964582				22	26.2014	8	9.21247	3.2571	0.0289372	*			22	11.4507	8	0.945741	0.33437				22	13.1242	8	4.62431	1.63494	0.186389
	24	11.9179	4	13.4048	6.70242		24	16.5374	9	18.6262	6.20874			24	17.0433	8	3.34406	1.1823				24	26.0938	8	9.7747	3.45588	0.0303575	*			24	10.867	8	1.02385	0.361985				24	12.6718	8	4.24062	1.49929	0.162587
	26	12.4575	4	13.3144	6.65721		26	16.5244	9	18.8505	6.28352			26	17.1632	8	3.96586	1.40214				26	26.5333	8	10.5762	3.73926	0.0322384	*			26	10.7427	8	1.05967	0.374651				26	12.344	8	4.19599	1.48351	0.188982
	Respuesta 5-HT 10-6 expresada en gramos de tensión						Respuesta 5-HT 10-6 expresada en gramos de tensión							Promedio de las respuestas a WAY 161503 10-4 expresada como porcentaje a 100% KCl								Promedio de las respuestas a WAY 161503 10-4 expresada como porcentaje a 100% KCl									Promedio de las respuestas a RS 10221 10nM expresada como porcentaje a 100% KCl								Promedio de las respuestas a RS 10221 10nM expresada como porcentaje a 100% KCl
	MINUTO	PROMEDIO	n	DE	EE			PROMEDIO	n	DE	EE				PROMEDIO	n	DE	EE					PROMEDIO	n	DE	EE	WAY 161503 CC vs CS					PROMEDIO	n	DE	EE					PROMEDIO	n	DE	EE	RS10 CC vs CS
	0	0	4	0	0		0	0	9	0	0			0	0	8	0	0				0	0	8	0	0	#DIV/0!				0	0	8	0	0				0	0	8	0	0	0
	2	0.407804	4	0.323086	0.161543		2	0.806456	9	1.16045	0.386815			2	3.92035	8	2.49365	0.881639				2	2.30052	8	0.846967	0.299448	0.0698604				2	0.838577	8	0.5171	0.182822				2	2.02533	8	1.97037	0.69663	0.0590892
	4	1.17644	4	1.63219	0.816096		4	1.93549	9	1.87435	0.624783			4	6.49753	8	2.83406	1.00199				4	5.44627	8	2.07975	0.735302	0.200332				4	9.85205	8	3.92705	1.38842				4	9.15444	8	6.9678	2.46349	0.385907
	6	1.34708	4	1.23167	0.615837		6	2.01105	9	2.07029	0.690097			6	8.75279	8	3.29386	1.16456				6	9.32824	8	2.86293	1.0122	0.333951				6	20.7276	8	5.52477	1.9533				6	18.6082	8	10.5497	3.72987	0.306041
	8	1.5327	4	1.04213	0.521063		8	2.70255	9	2.56024	0.853412			8	10.4118	8	3.90353	1.38011				8	11.4791	8	3.23373	1.14329	0.246956				8	28.7602	8	7.11103	2.51413				8	25.4988	8	12.0208	4.24999	0.269682
	10	1.77007	4	0.957886	0.478943		10	3.75459	9	2.94425	0.981416			10	11.2613	8	3.79148	1.34049				10	13.6658	8	3.44533	1.21811	0.100906				10	33.6619	8	8.14305	2.879				10	29.0353	8	11.1453	3.94047	0.203623
	12	1.70578	4	1.04038	0.52019		12	4.52922	9	4.44664	1.48221			12	11.9546	8	4.1679	1.47358				12	14.9417	8	3.76428	1.33087	0.0990384				12	34.5635	8	8.36232	2.95653				12	30.9601	8	10.1004	3.57102	0.25092
	14	1.73963	4	1.5553	0.777651		14	4.75754	9	5.15055	1.71685			14	12.2188	8	4.26099	1.50649				14	15.4714	8	3.95923	1.3998	0.0998037				14	33.7459	8	8.05632	2.84834				14	30.9595	8	10.1931	3.60379	0.297233
	16	1.78853	4	0.56315	0.281575		16	4.9014	9	5.63664	1.87888			16	12.5321	8	3.96114	1.40047				16	16.1499	8	4.09626	1.44825	0.0913753				16	33.5894	8	8.0972	2.86279				16	30.4729	8	10.4133	3.68164	0.274849
	18	1.60303	4	0.568369	0.284184		18	5.073	9	6.01876	2.00625			18	12.5543	8	4.19639	1.48365				18	16.3064	8	4.35247	1.53883	0.095888				18	33.3007	8	8.04895	2.84573				18	29.9011	8	10.1113	3.57487	0.254556
	20	1.63021	4	0.738111	0.369056		20	5.13992	9	6.20167	2.06722			20	12.6658	8	3.72265	1.31615				20	16.1842	8	4.24458	1.50069	0.109917				20	32.5068	8	7.82435	2.76633				20	29.2818	8	9.9797	3.52836	0.261501
	22	1.04679	4	0.554408	0.277204		22	4.98037	9	6.35872	2.11957			22	12.9996	8	4.06731	1.43801				22	16.606	8	4.40201	1.55635	0.117535				22	32.468	8	7.68877	2.71839				22	28.7787	8	9.57135	3.38398	0.232946
	24	1.3019	4	0.605182	0.302591		24	4.84144	9	6.17624	2.05875			24	13.2505	8	4.27054	1.50987				24	16.3263	8	4.72534	1.67066	0.170294				24	31.4267	8	7.5052	2.65349				24	28.6573	8	10.3664	3.66508	0.29576
	26	1.09521	4	1.23543	0.617716		26	5.04067	9	6.3097	2.10323			26	13.8131	8	4.38355	1.54982				26	16.2138	8	4.53407	1.60304	0.227011				26	30.6058	8	7.16951	2.5348				26	28.0937	8	10.3471	3.65824	0.312508
	Respuesta 5-HT 10-7 expresada en gramos de tensión						Respuesta 5-HT 10-7 expresada en gramos de tensión							Promedio de las respuestas a BW723C86 10-4 expresada como porcentaje a 100% KCl								Promedio de las respuestas a BW723C86 10-4 expresada como porcentaje a 100% KCl									Promedio de las respuestas a RS 127445 10nM expresada como porcentaje a 100% KCl								Promedio de las respuestas a RS 127445 10nM expresada como porcentaje a 100% KCl
	MINUTO	PROMEDIO	n	DE	EE			PROMEDIO	n	DE	EE				PROMEDIO	n	DE	EE					PROMEDIO	n	DE	EE	BW723C86 CC vs CS					PROMEDIO	n	DE	EE					PROMEDIO	n	DE	EE	RS 12 CC vs CS
	0	0	4	0	0		0	0	9	0	0			0	0	8	0	0				0	0	8	0	0	#DIV/0!				0	0	8	0	0				0	0	8	0	0
	2	0.134586	4	0.825281	0.41264		2	0.496369	9	0.793472	0.264491			2	-0.140145	8	0.852079	0.301255				2	-0.0653309	8	0.403333	0.1426	0.420282				2	11.3477	8	1.4711	0.520112				2	10.8675	8	8.71149	3.07998
	4	0.394605	4	0.643452	0.321726		4	1.13043	9	1.14834	0.382781			4	0.0342688	8	1.05433	0.372762				4	0.246497	8	0.299887	0.106026	0.29646				4	24.0561	8	8.29828	2.93389				4	26.2897	8	12.67	4.47952
	6	0.683925	4	0.722382	0.361191		6	2.05834	9	2.20422	0.734739			6	0.225147	8	0.886498	0.313424				6	0.28898	8	0.644118	0.22773	0.423249				6	31.926	8	6.84578	2.42035				6	39.6852	8	9.53697	3.37183
	8	1.19857	4	0.947104	0.473552		8	2.68806	9	2.74341	0.91447			8	0.116123	8	1.08846	0.38483				8	0.638596	8	0.5357	0.189399	0.0871231				8	37.5392	8	7.61383	2.6919				8	46.063	8	7.80989	2.76121
	10	1.10315	4	0.480209	0.240105		10	3.28394	9	2.87941	0.959804			10	0.303689	8	1.0534	0.372432				10	1.06703	8	0.454432	0.160666	0.0587422				10	40.1175	8	8.14637	2.88018				10	49.0487	8	6.77256	2.39446
	12	1.48051	4	0.829129	0.414565		12	3.55737	9	2.96037	0.986788			12	0.311472	8	0.932167	0.329571				12	1.16851	8	0.400129	0.141467	0.0208037				12	41.0168	8	7.83197	2.76902				12	50.3077	8	6.29993	2.22736
	14	1.0674	4	0.987417	0.493708		14	4.10364	9	2.96556	0.98852			14	0.496973	8	1.04421	0.369184				14	1.40148	8	0.402548	0.142322	0.0358774				14	40.0999	8	7.48559	2.64655				14	50.0599	8	6.06813	2.14541
	16	0.707794	4	1.08812	0.544061		16	4.20672	9	3.08253	1.02751			16	0.227489	8	1.01487	0.358811				16	1.37372	8	0.670775	0.237155	0.0208322				16	39.7506	8	7.27505	2.57212				16	50.2954	8	6.31953	2.23429
	18	0.31295	4	0.633048	0.316524		18	4.28984	9	3.34236	1.11412			18	0.329901	8	1.11542	0.394361				18	1.42666	8	0.434488	0.153615	0.0207343				18	39.8073	8	7.23996	2.55971				18	50.8598	8	6.75026	2.38658
	20	0.790847	4	1.26723	0.633613		20	4.28417	9	3.25713	1.08571			20	0.368066	8	1.18044	0.417347				20	1.66844	8	0.316409	0.111868	0.00920707				20	39.705	8	7.19467	2.5437				20	51.4348	8	7.52348	2.65995
	22	0.221188	4	1.24485	0.622423		22	4.39524	9	3.47205	1.15735			22	0.546722	8	1.07706	0.380799				22	1.65049	8	0.294249	0.104033	0.0177614				22	40.0247	8	7.09548	2.50863				22	51.6913	8	7.65976	2.70813
	24	0.523458	4	1.03533	0.517665		24	4.04119	9	3.64105	1.21368			24	0.462702	8	1.20521	0.426105				24	1.912	8	0.499154	0.176478	0.0111551				24	40.2739	8	6.98544	2.46973				24	52.0004	8	8.06418	2.85112
	26	0.347409	4	1.01588	0.507938		26	3.66764	9	3.62421	1.20807			26	0.399886	8	1.27627	0.451229				26	1.97988	8	0.397183	0.140425	0.0090815				26	40.2599	8	6.65239	2.35197				26	52.3612	8	7.895	2.7913
